# Supplementary material
Source: HighWire-hosted journal article supplement (doi:10.1101/rna.077602.120)
Supplement: Supplemental_Material.docx [file Supplemental_Material.docx]

**
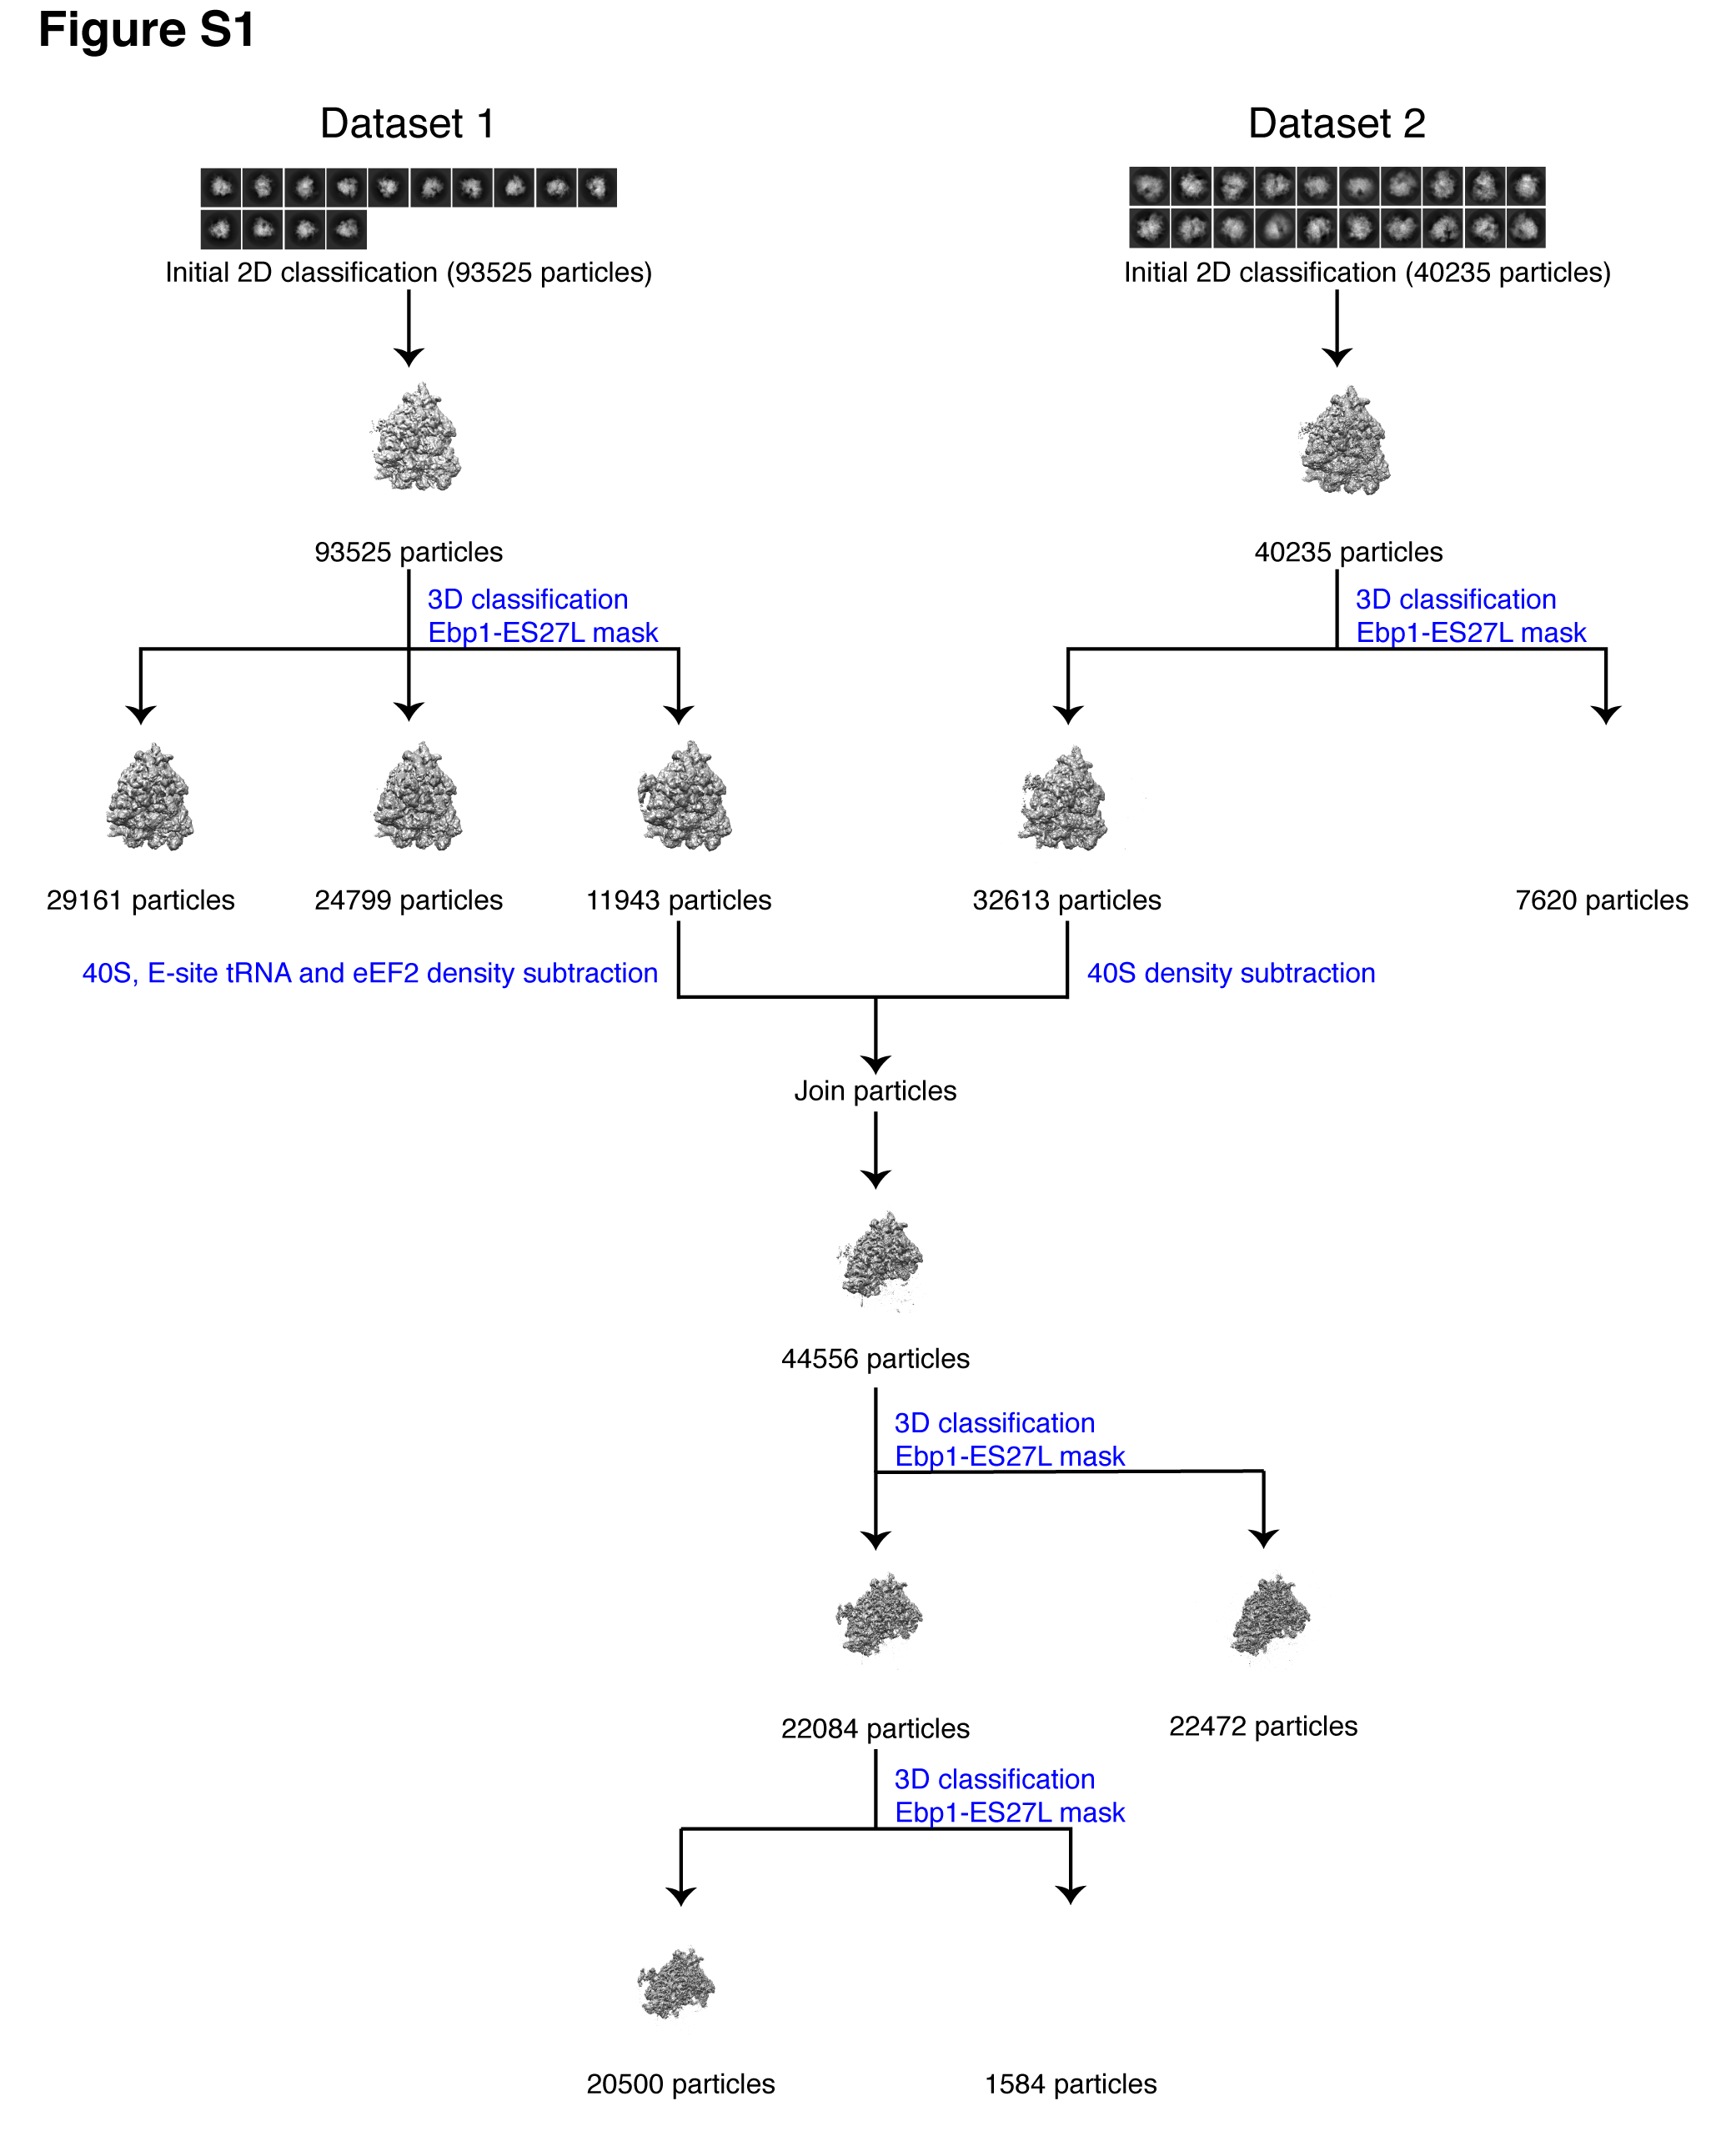
**

**Supplemental figure S1:** Overview of cryo-EM data processing scheme.


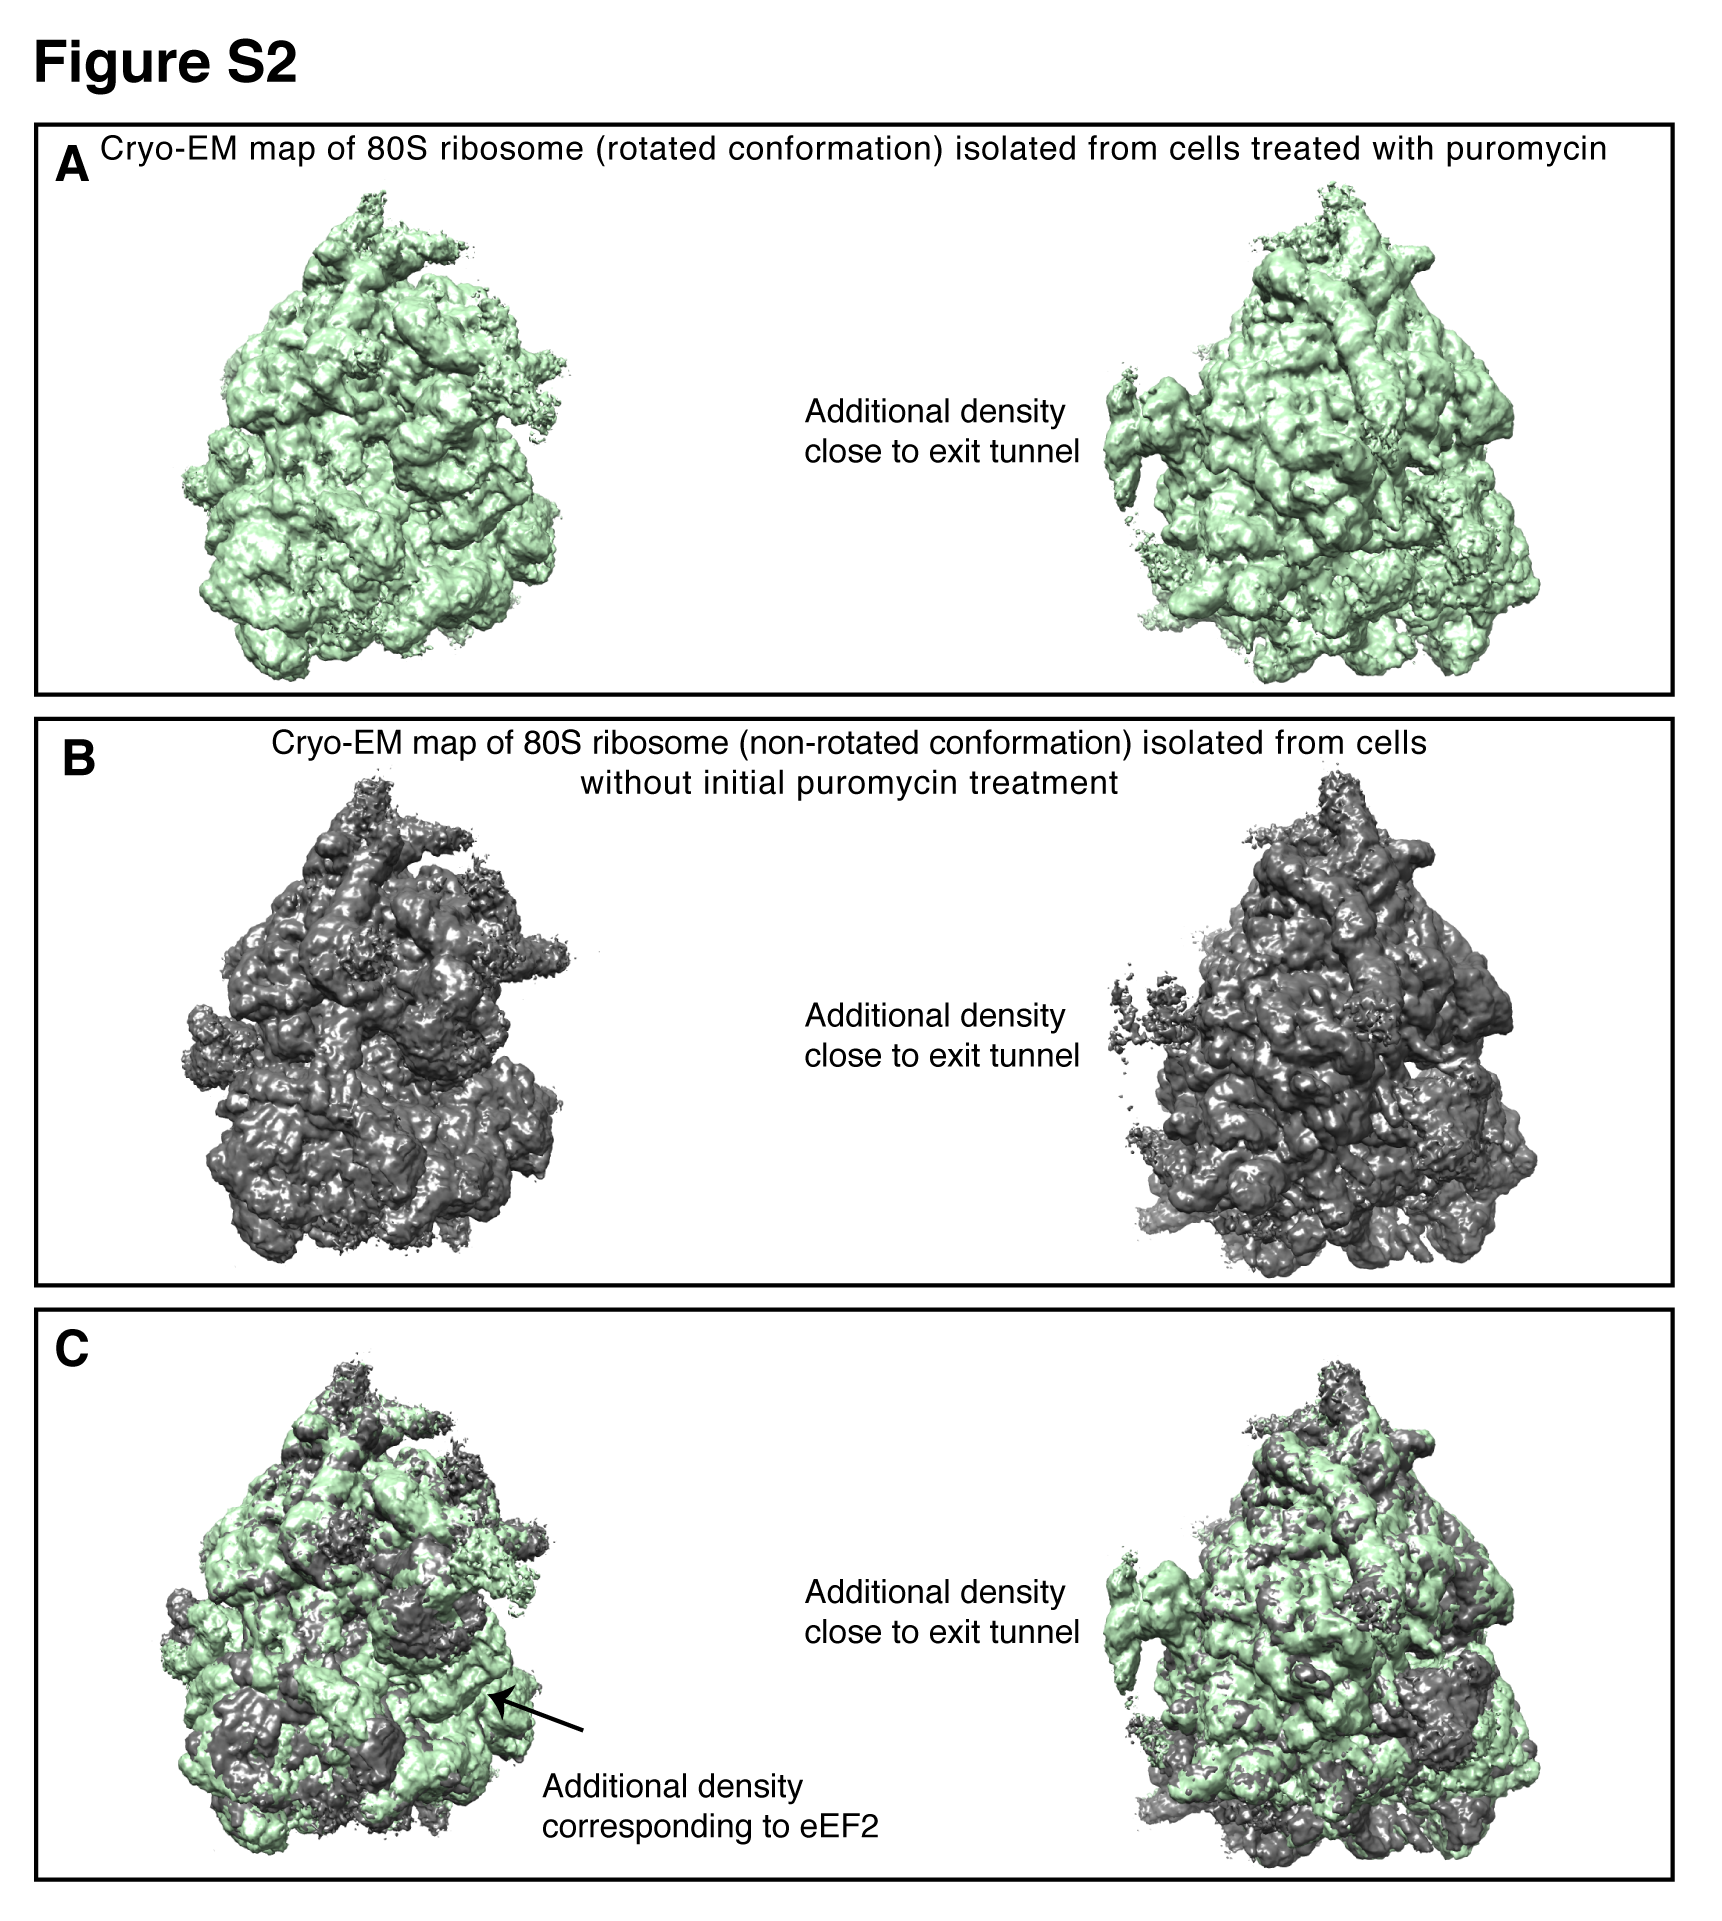


**Supplemental figure S2:** Cryo-EM maps obtained from the individual datasets. (A) Cryo-EM map of human 80S ribosome in rotated conformation that were isolated from cells treated with puromycin. (B) Cryo-EM map of human 80S ribosome in non-rotated POST conformation that were isolated from cells without initial puromycin treatment. (C) Superposition of the maps obtained from two different methods. Additional density close to exit tunnel and the density belonging to eEF2 are indicated.


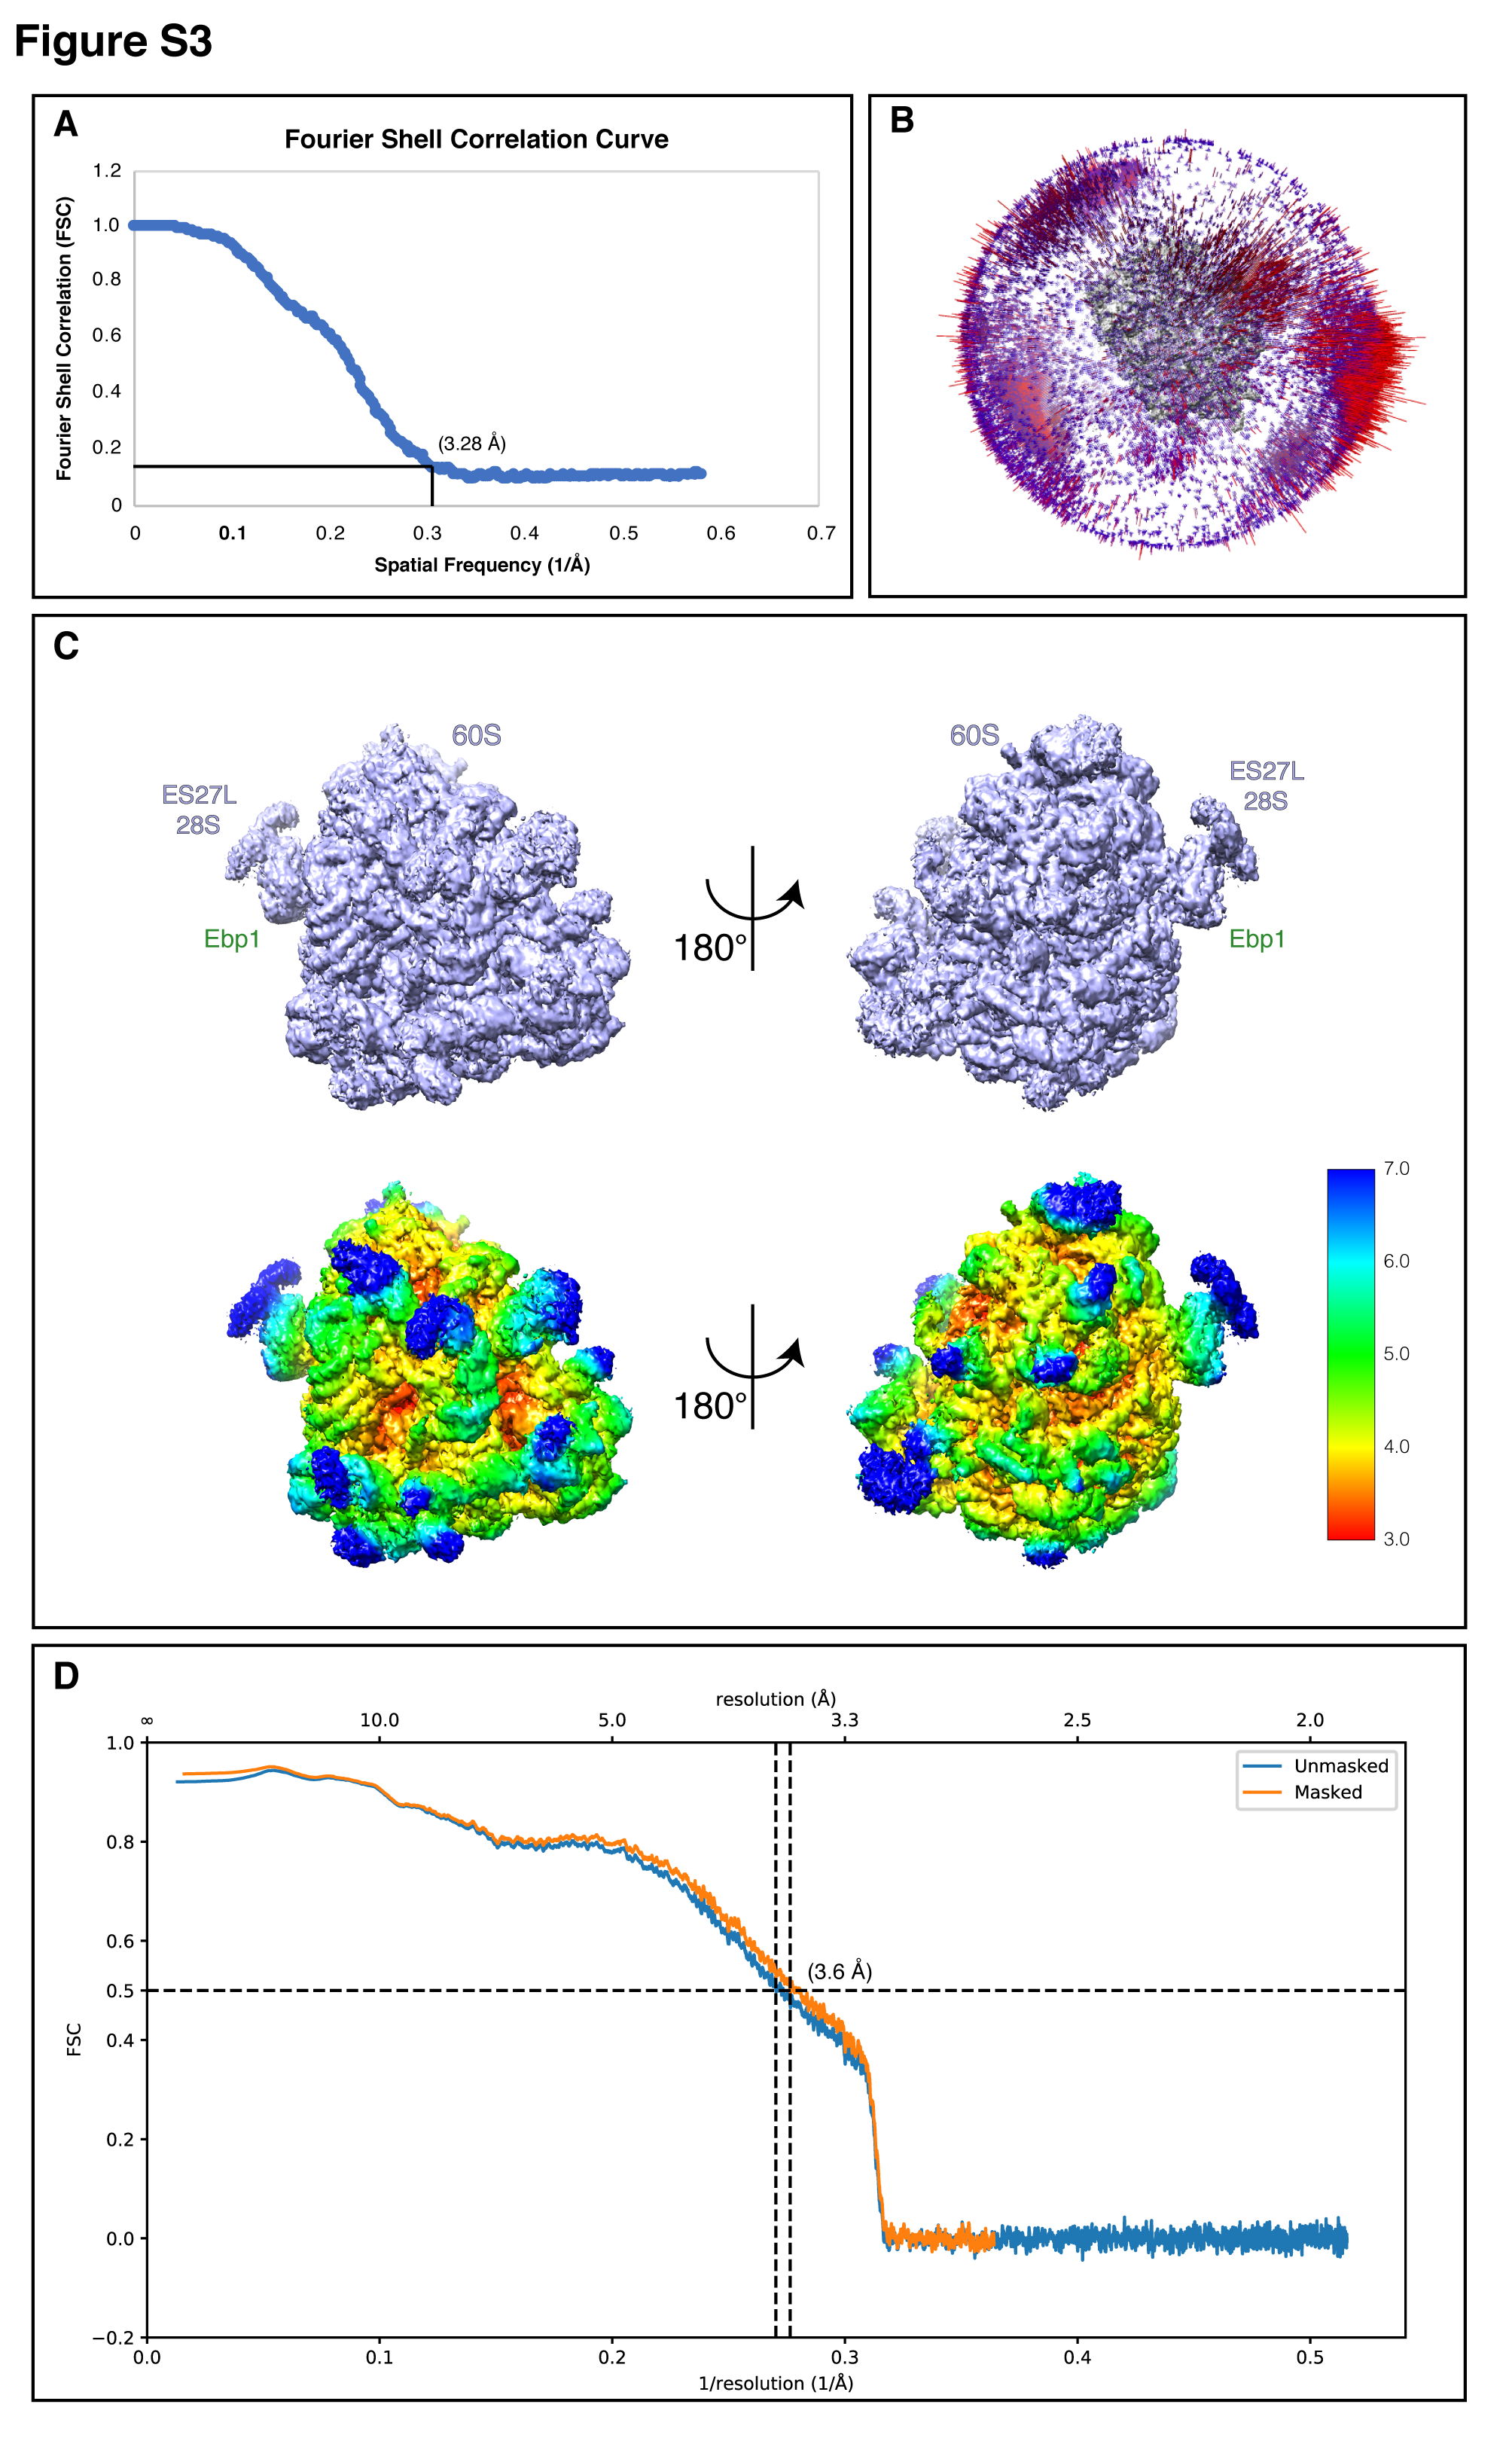


**Supplemental figure S3:** Cryo-EM refinement data for human Ebp1–ribosome complex. (A) Gold standard FSC curves for the postprocessed map of the human Ebp1–ribosome complex. Resolution at FSC 0.143 cut-off is indicated. (B) Angular distribution of the particles used for the final reconstruction of the human Ebp1–ribosome complex. (C) Local resolution estimation in the cryo-EM map of the human Ebp1–ribosome complex. (D) Map to model FSC curves of the refined 60S–Ebp1 complex with the unmasked and masked maps. Resolution at FSC=0.5 is indicated.


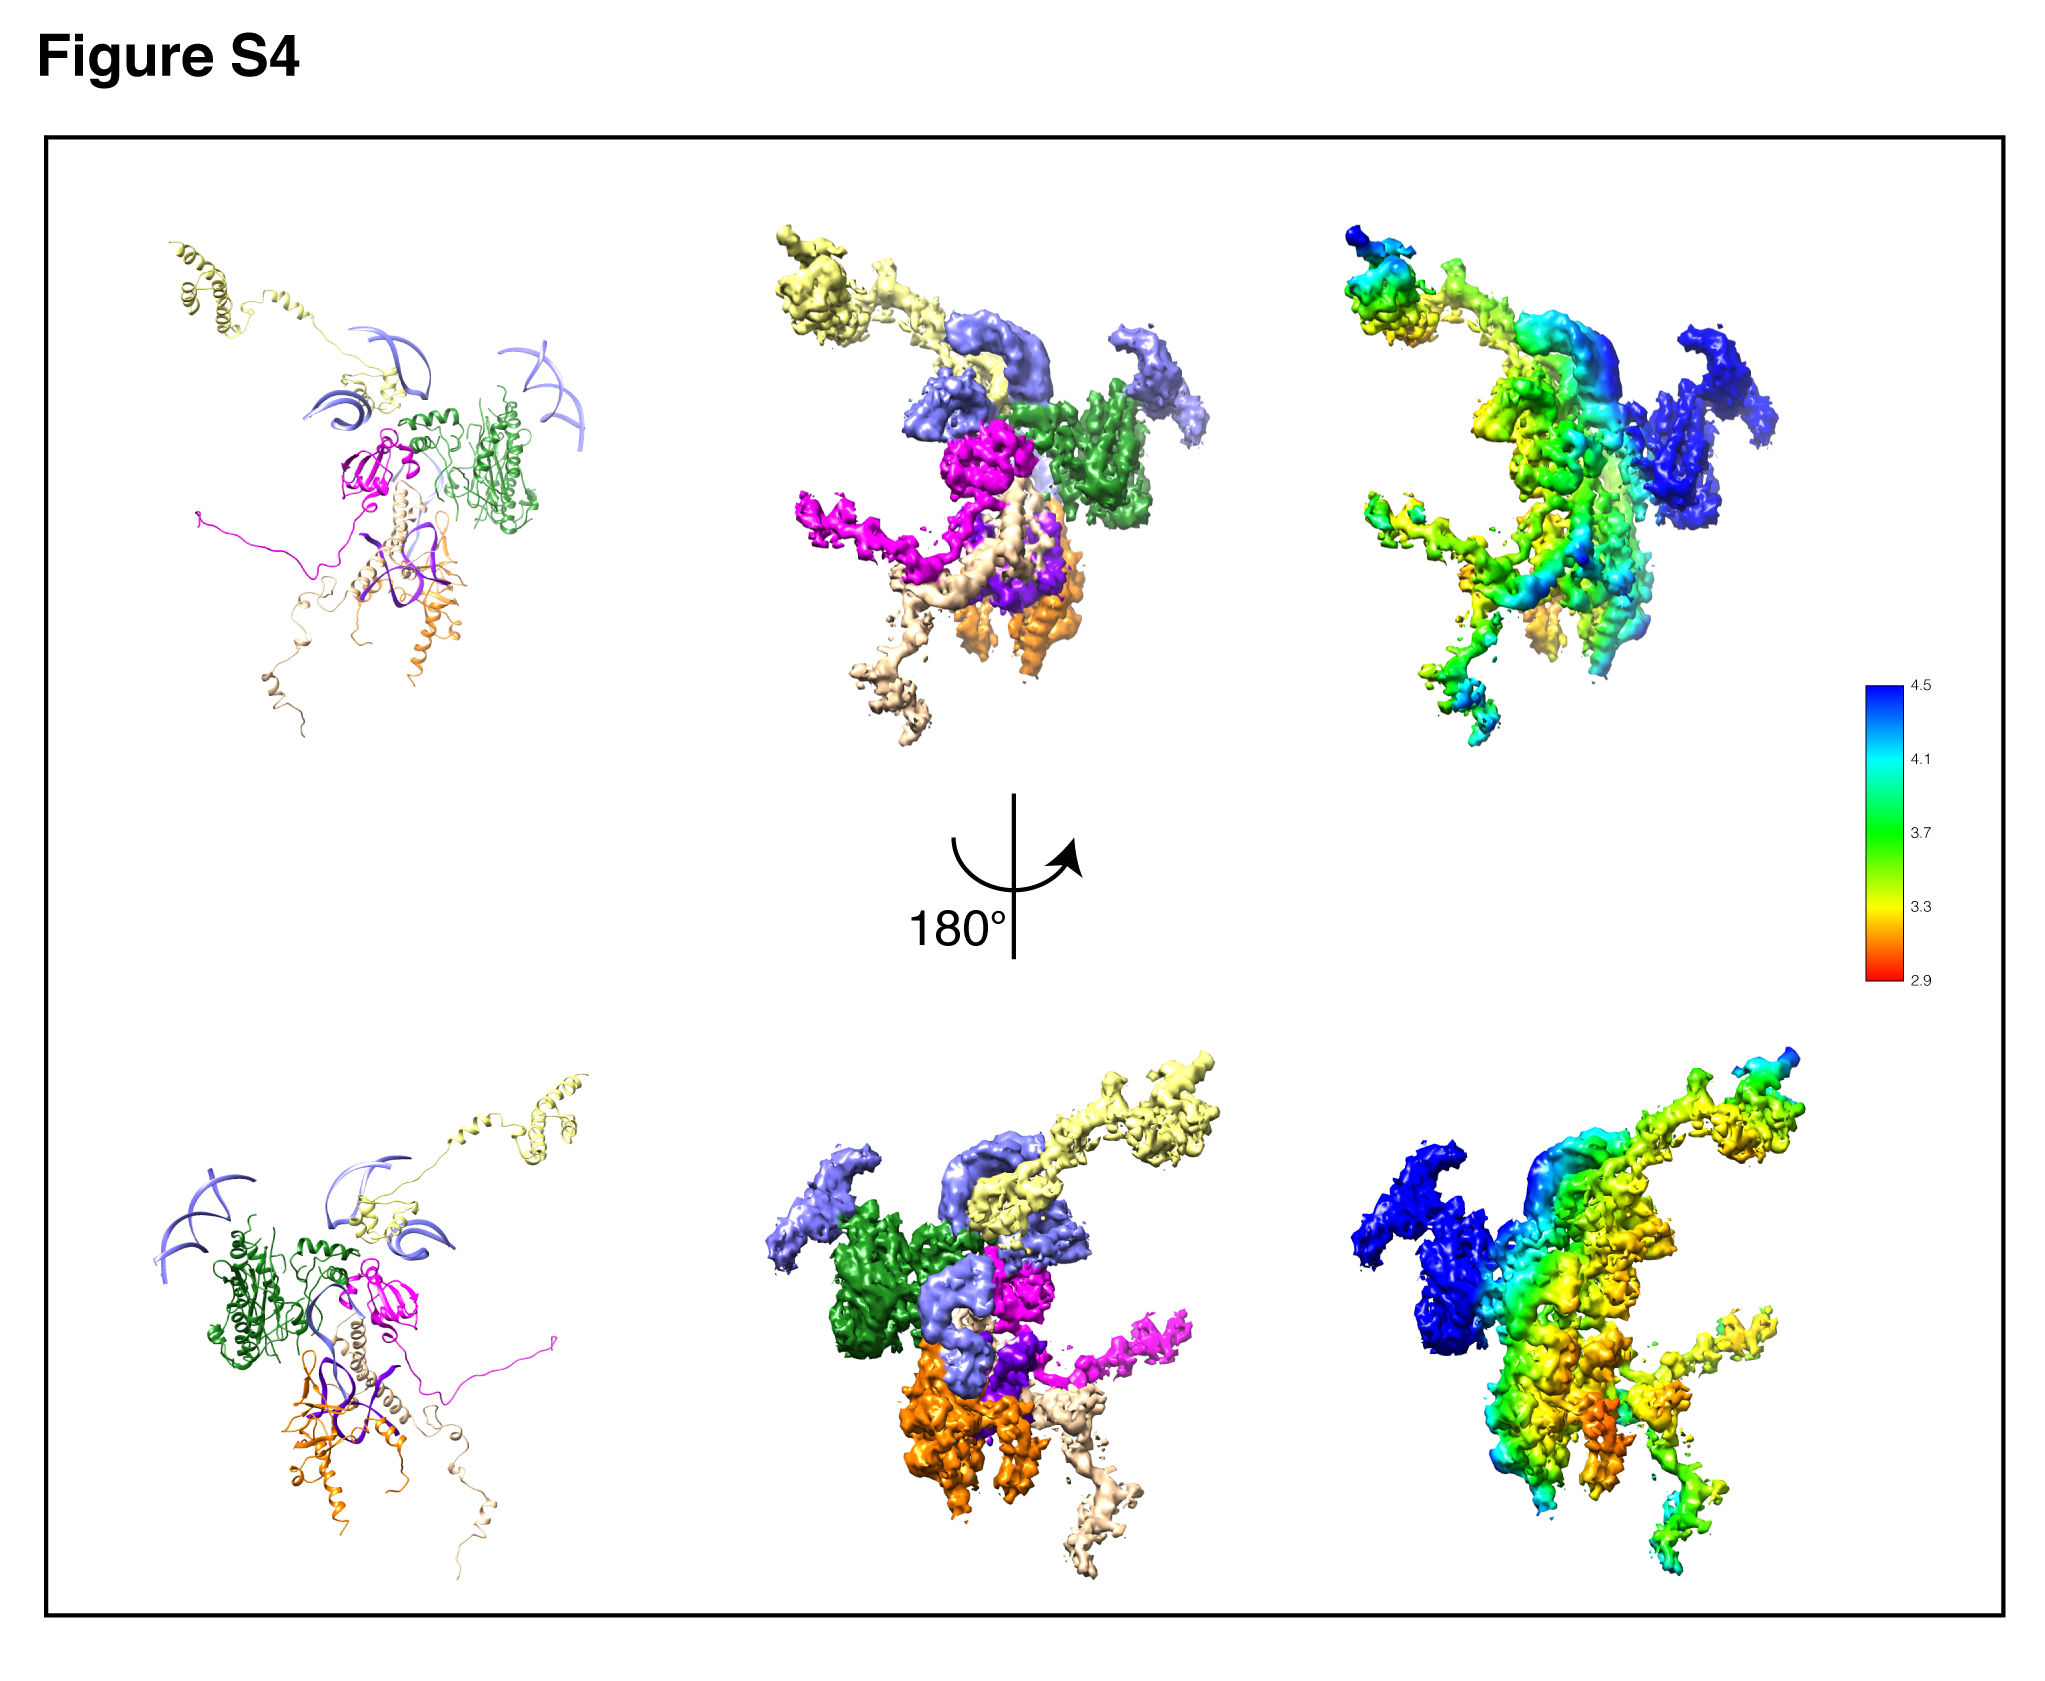


**Supplemental figure S4:** Local resolution estimation at the Ebp1 binding site in the cryo-EM map of human Ebp1–monosome complex. Proteins and rRNAs are colored as in Figure 1 (Left and middle (surface) panels) along with the local resolution estimate (right).


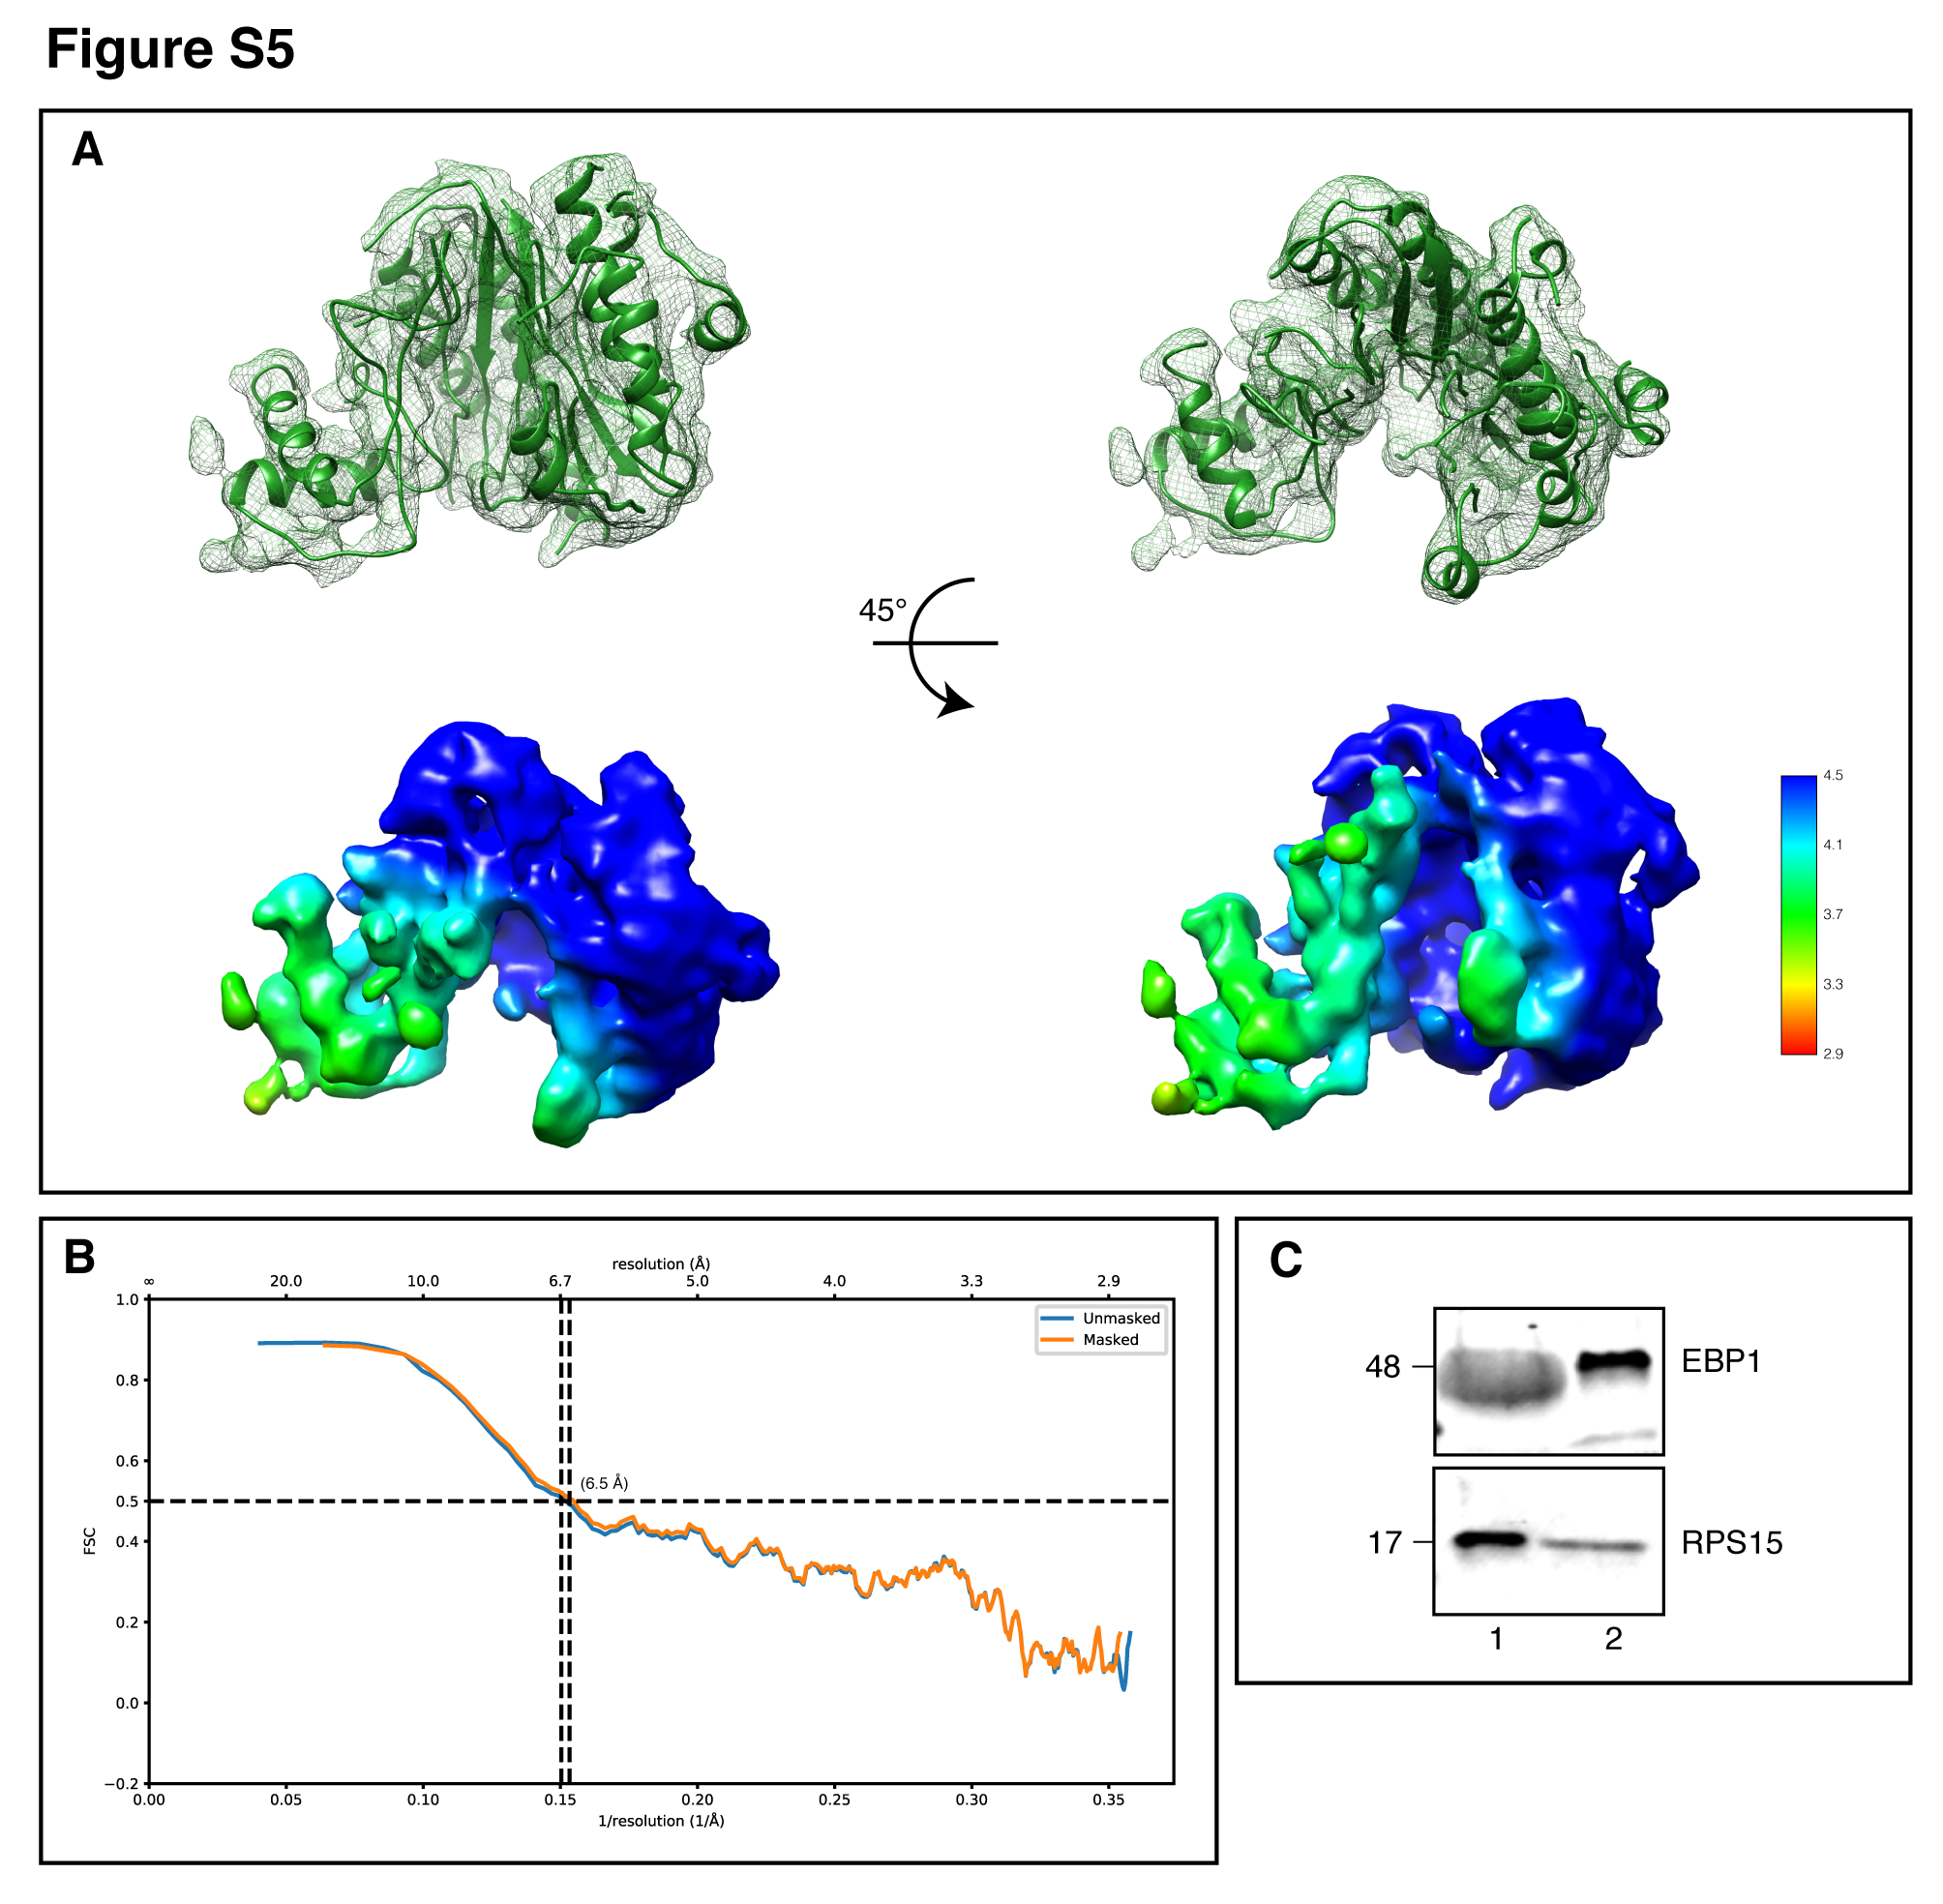


**Supplemental figure S5:** Quality offit of the Ebp1 atomic model in the cryo-EM map. (A) Fit of the Ebp1 in the cryo-EM map and the local resolution estimate are displayed in two orientations. (B) Local map to model FSC curve of the Ebp1 atomic model and the corresponding cryo-EM map region. Resolution at FSC=0.5 is indicated. (C) Western blot analysis of the ribosome samples purified using the modified protocols of Khatter *et al* (1) or Bhaskar *et al.* (2). The bands corresponding to Ebp1 and RPS15/uS19 (loading control) in the purified samples are shown.

**
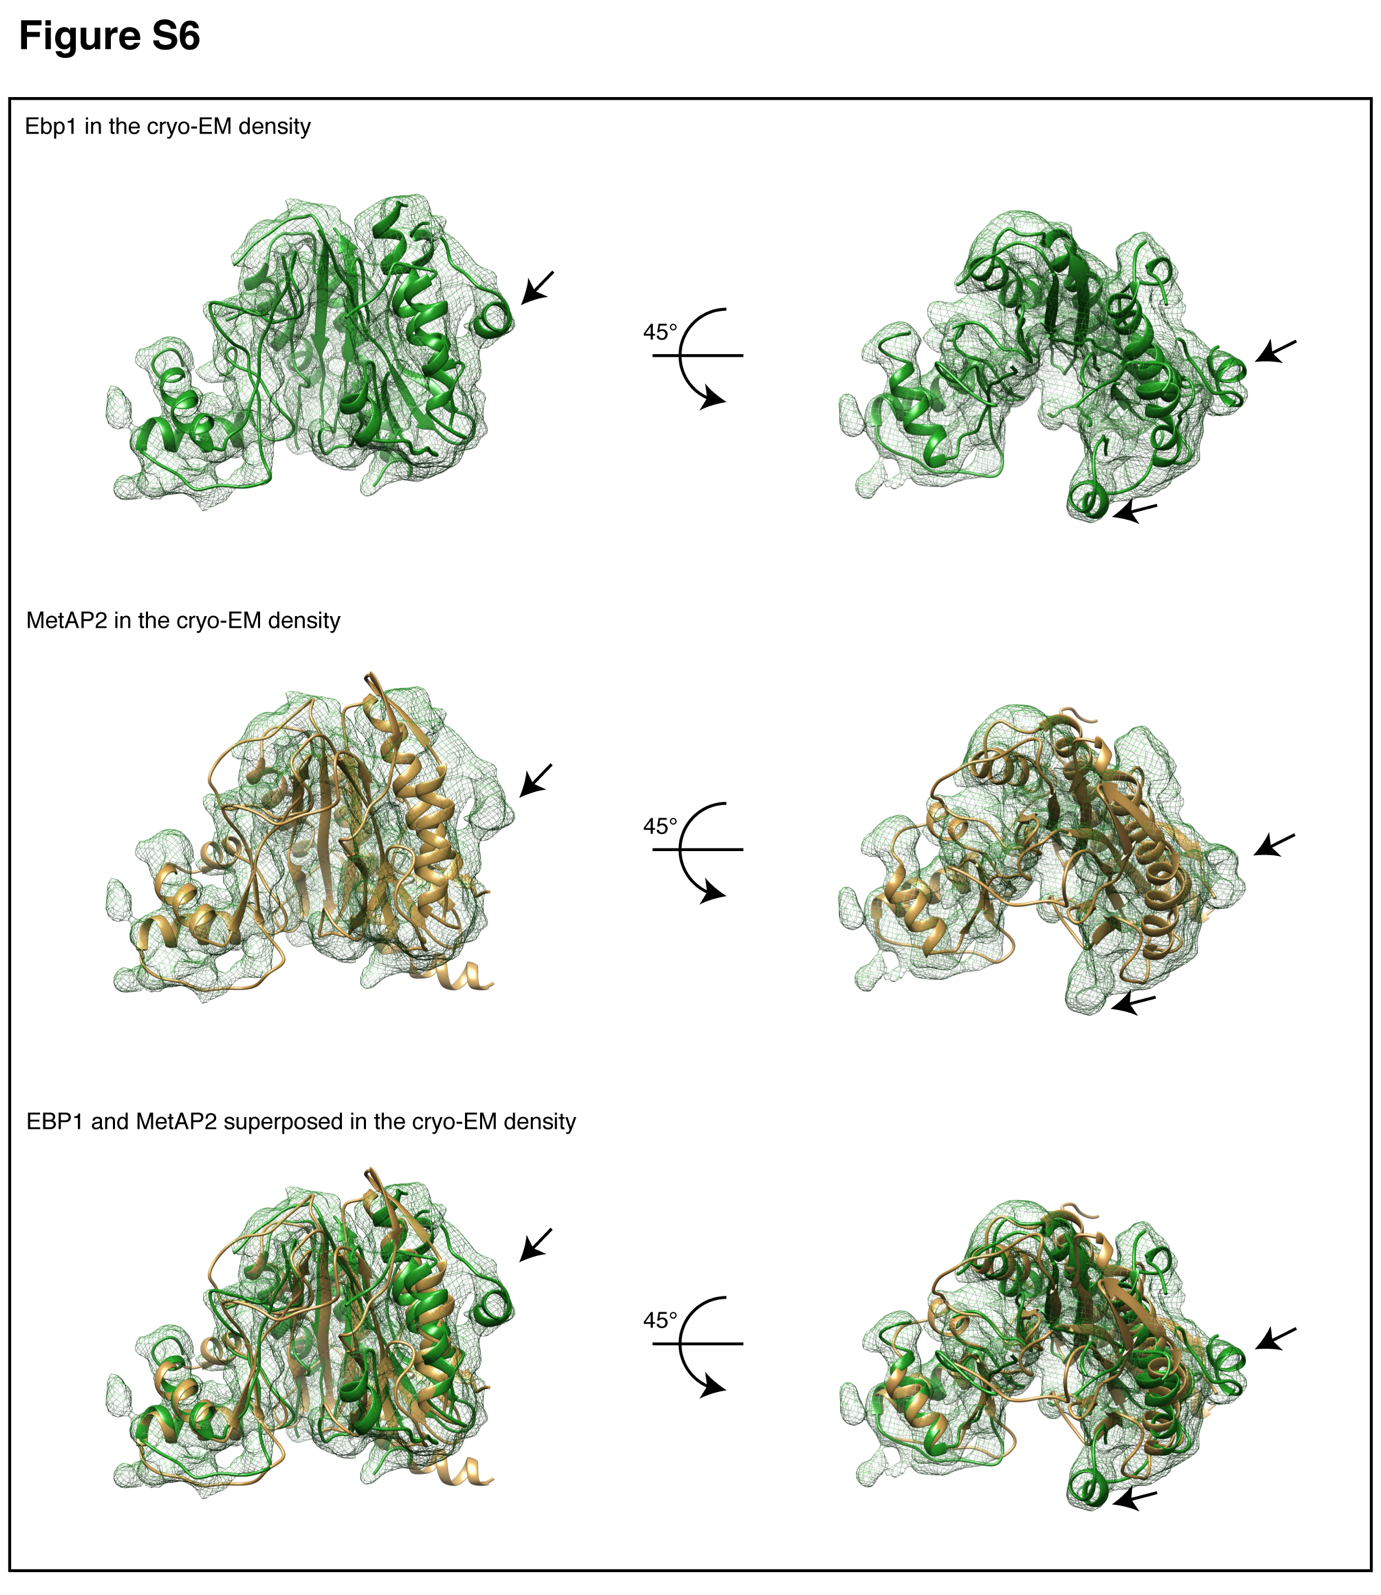
**

**Supplemental figure S6:** Comparison of the Ebp1 (green) and MetAP2 (brown) (PDB: 1KQ0) models docked in to the cryo-EM map is shown. The unique regions in the map density corresponding to Ebp1 are highlighted with arrows.


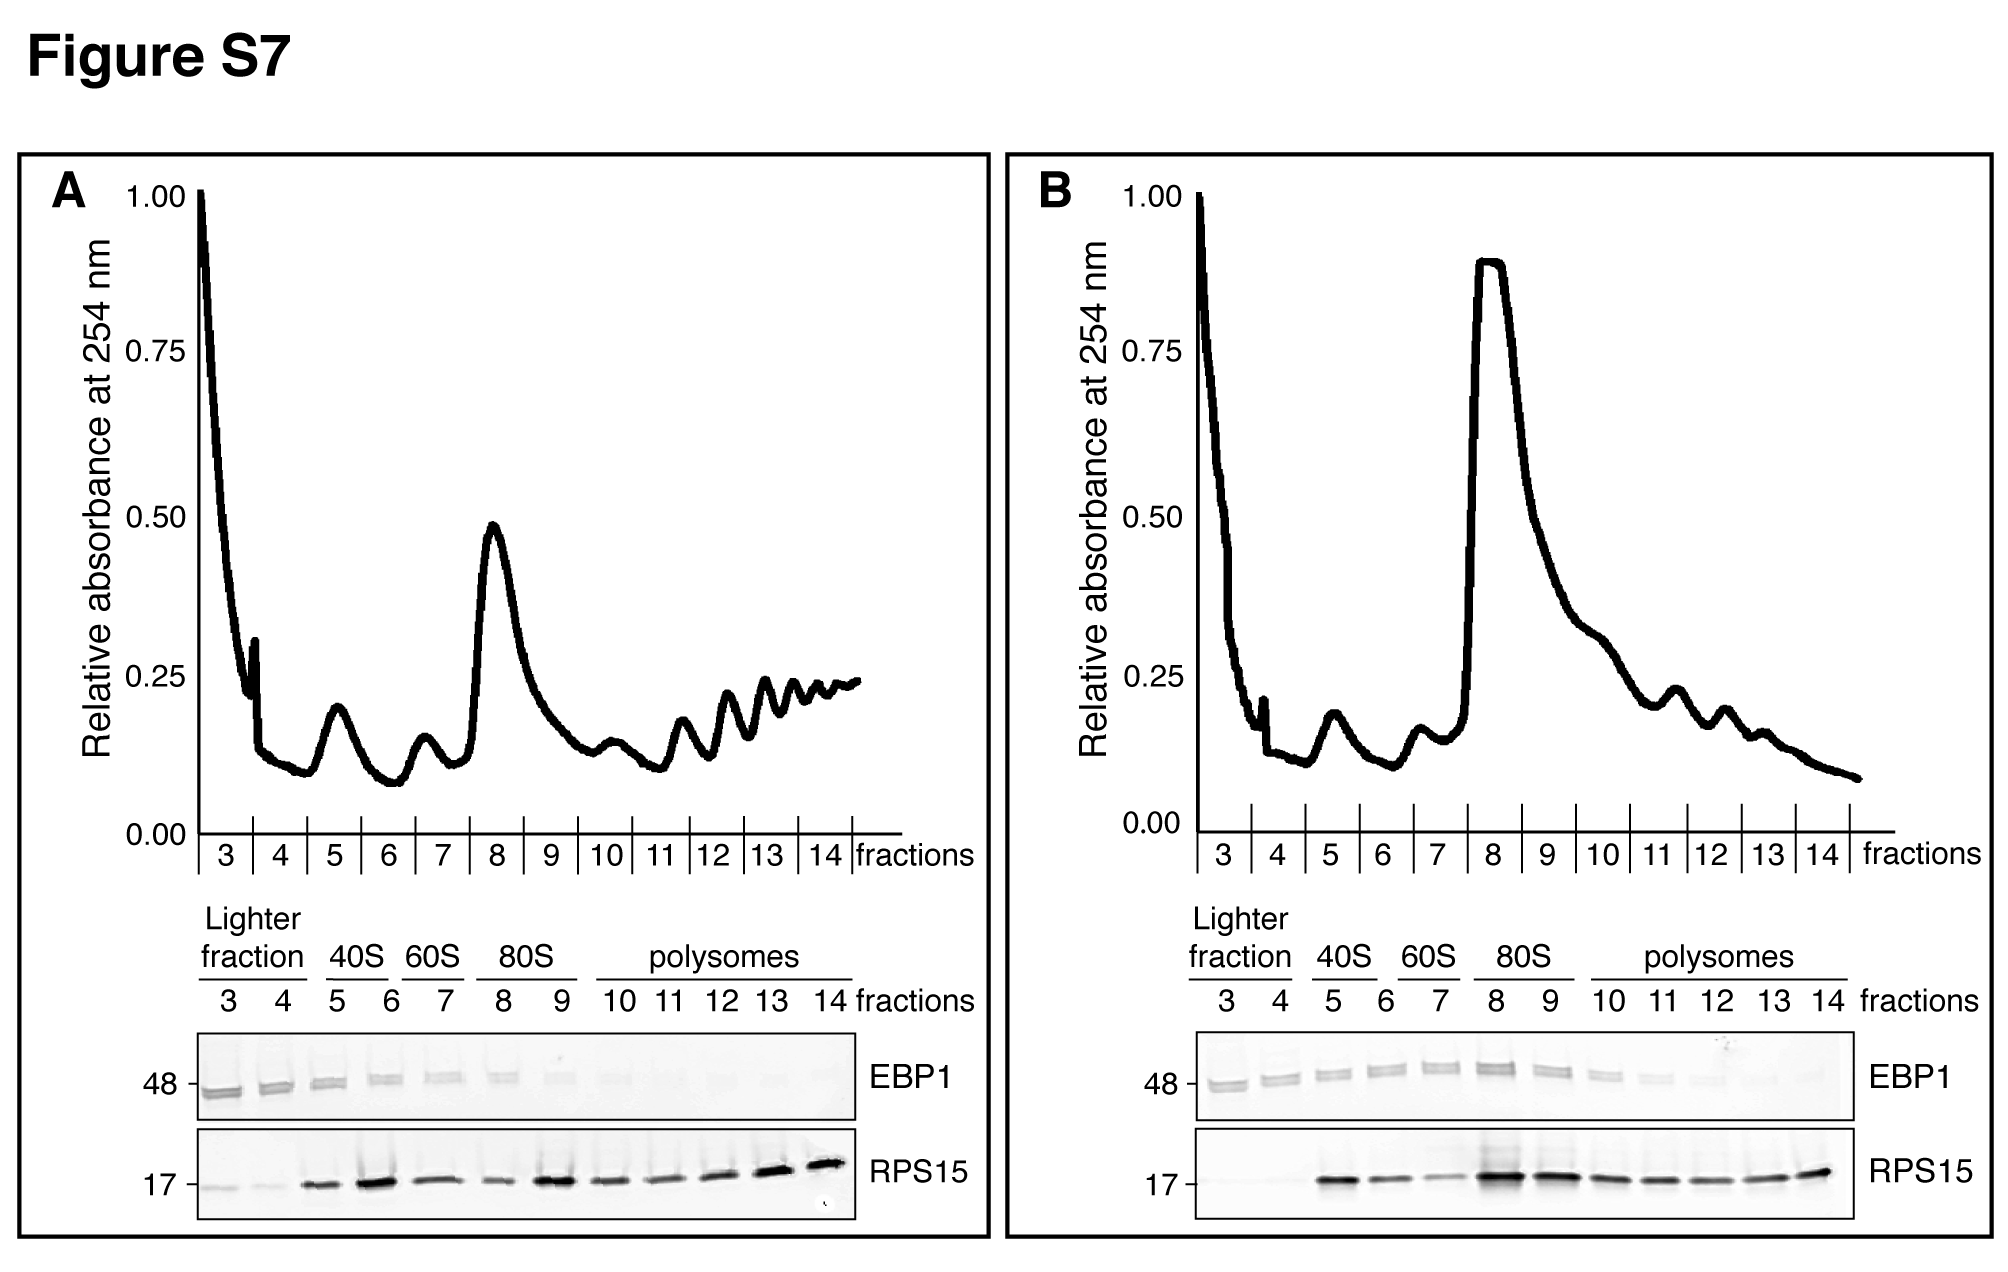


**Supplemental figure S7:** Ebp1 co-purifies preferentially with 80S ribosomes that lack nascent polypeptide chains. (A–B) Polysome profiles and subsequent western blot analysis for Ebp1 and RPS15 (uS19) from control (A) or puromycin–treated (B) cells are shown.

**
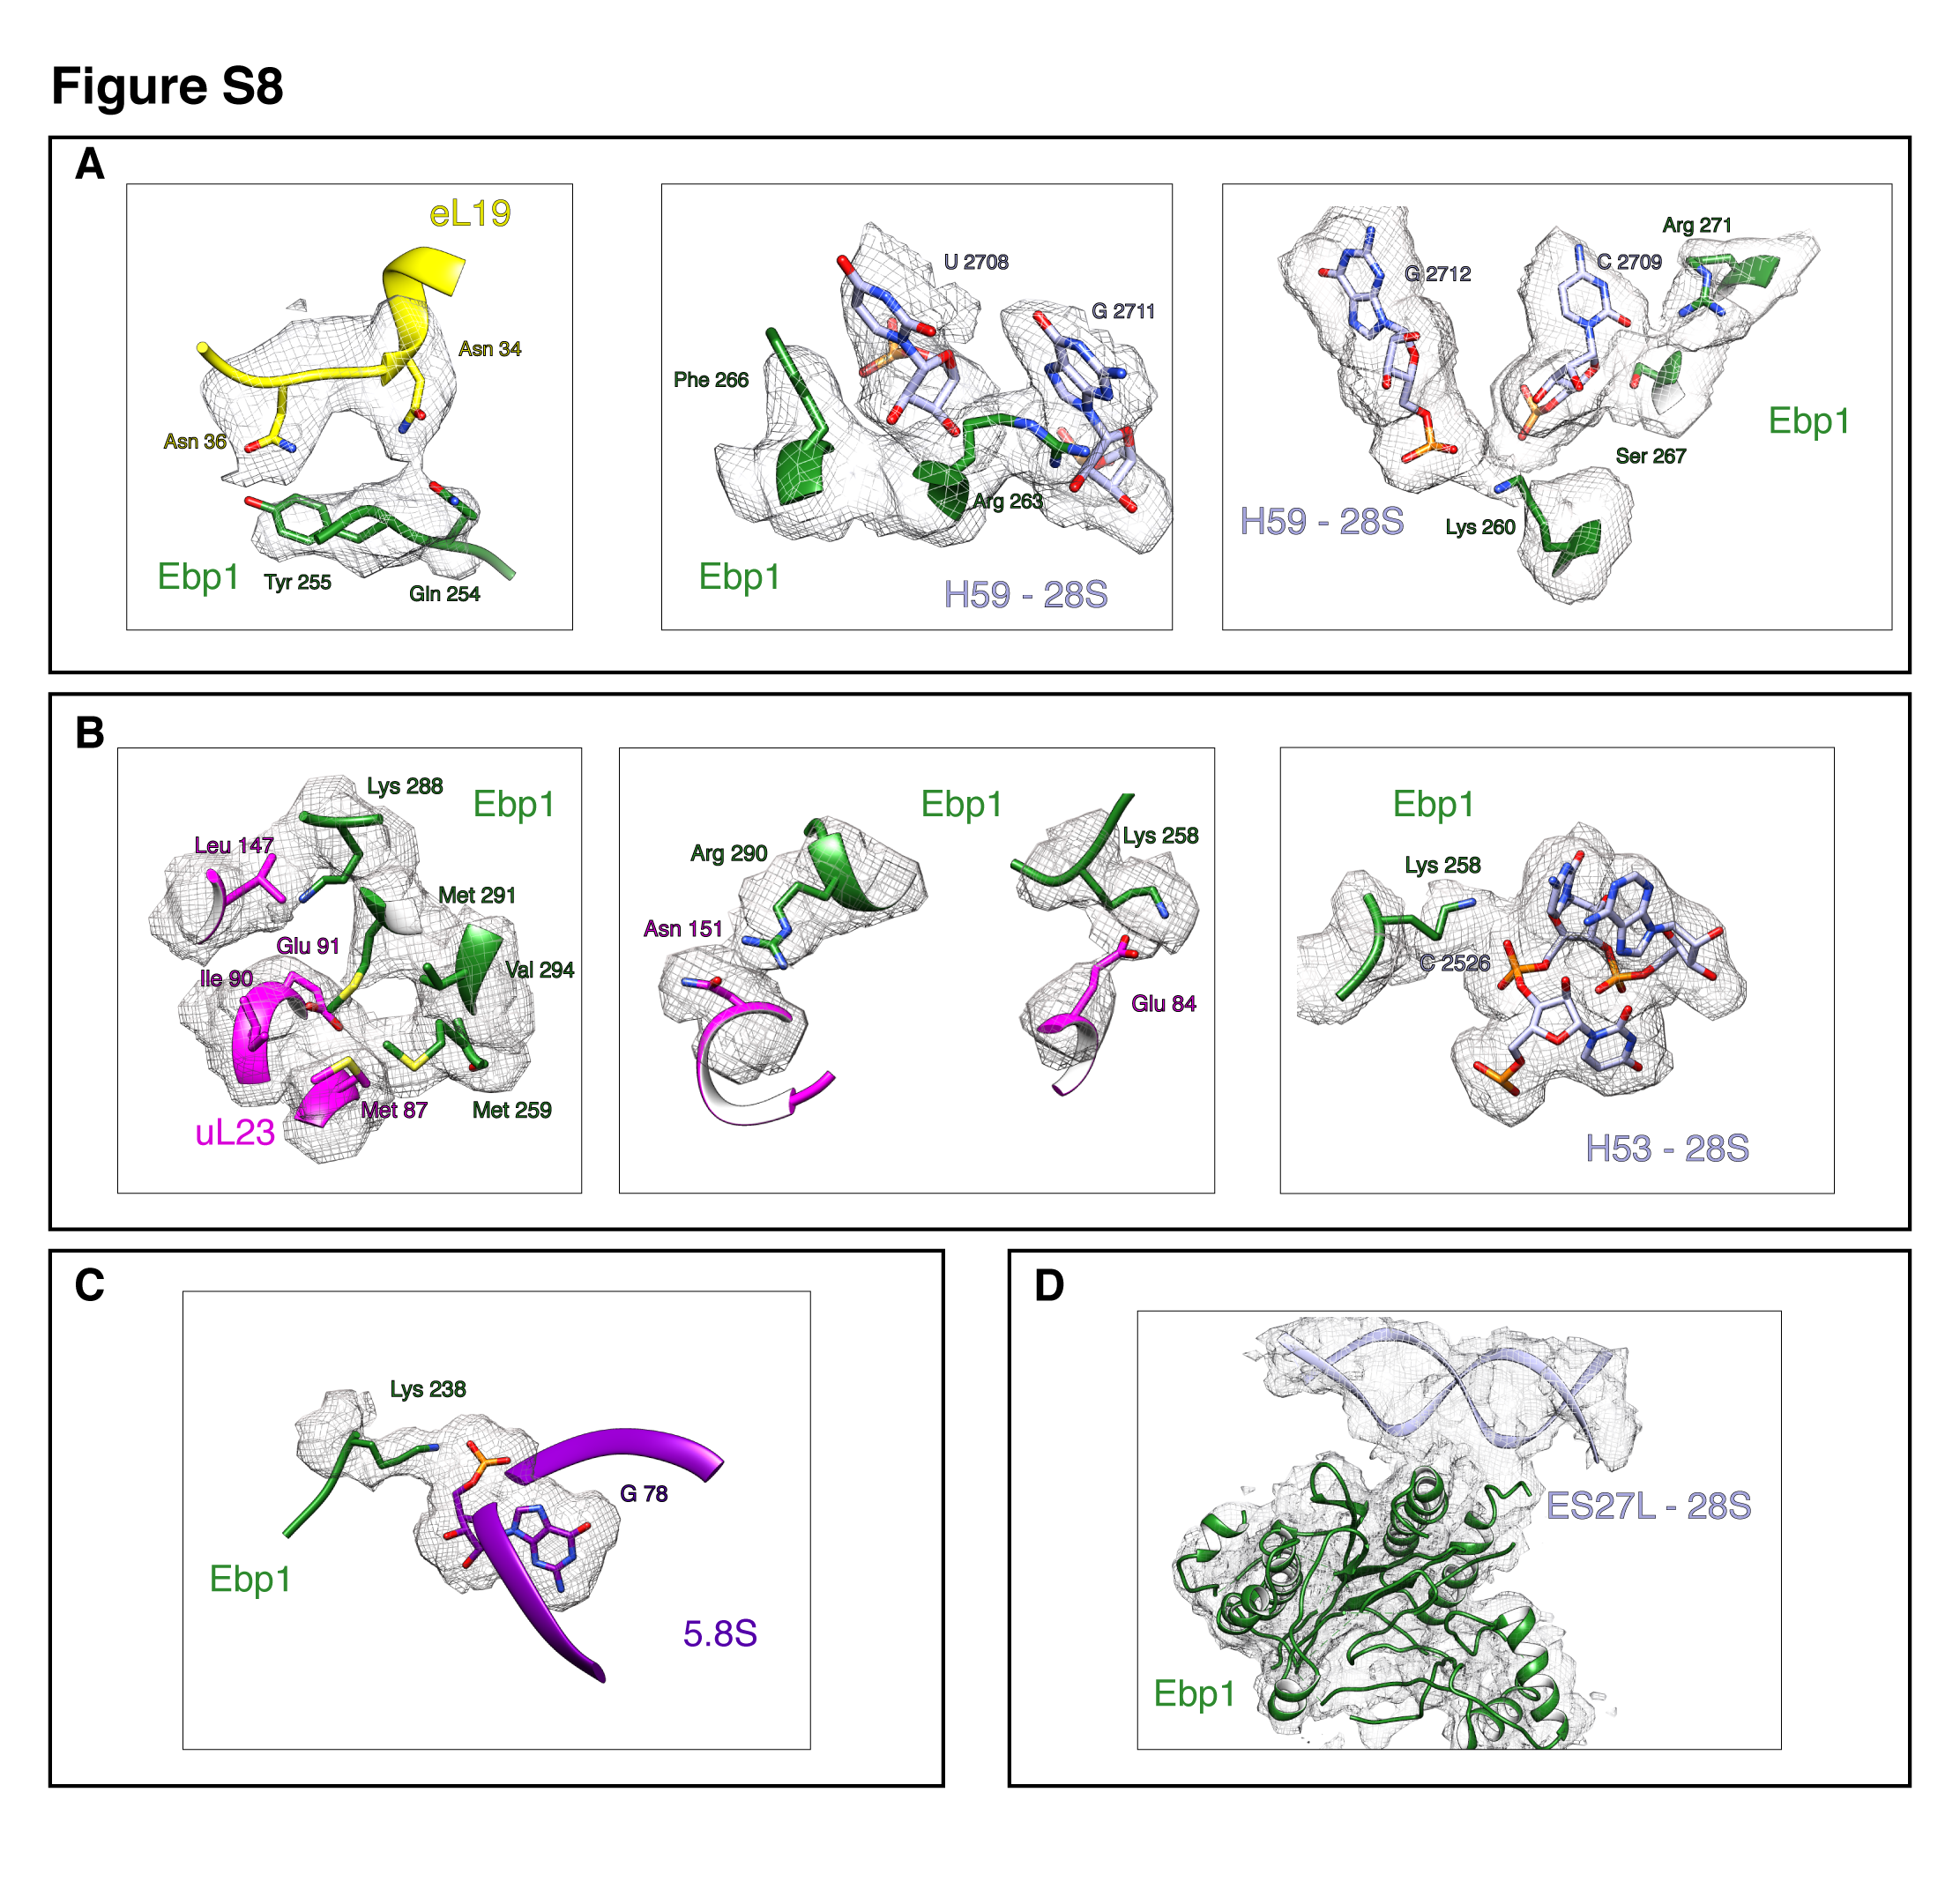
**

**Supplemental figure S8:** Cryo-EM map features at the interface of Ebp1–ribosome complex. (A) Cryo-EM map features of Ebp1 (green)–eL19 (yellow) and H59 of 28S rRNA (light blue) interface. (B) Cryo-EM map features of Ebp1 (green)–uL23 (magenta) and H53 of 28S rRNA (light blue) interface. (C) Cryo-EM map features of Ebp1 (green)–5.8S rRNA (purple) interface. (D) Interaction interface and the corresponding cryo-EM map features between Ebp1 (green) and ES27L (light blue) are shown.


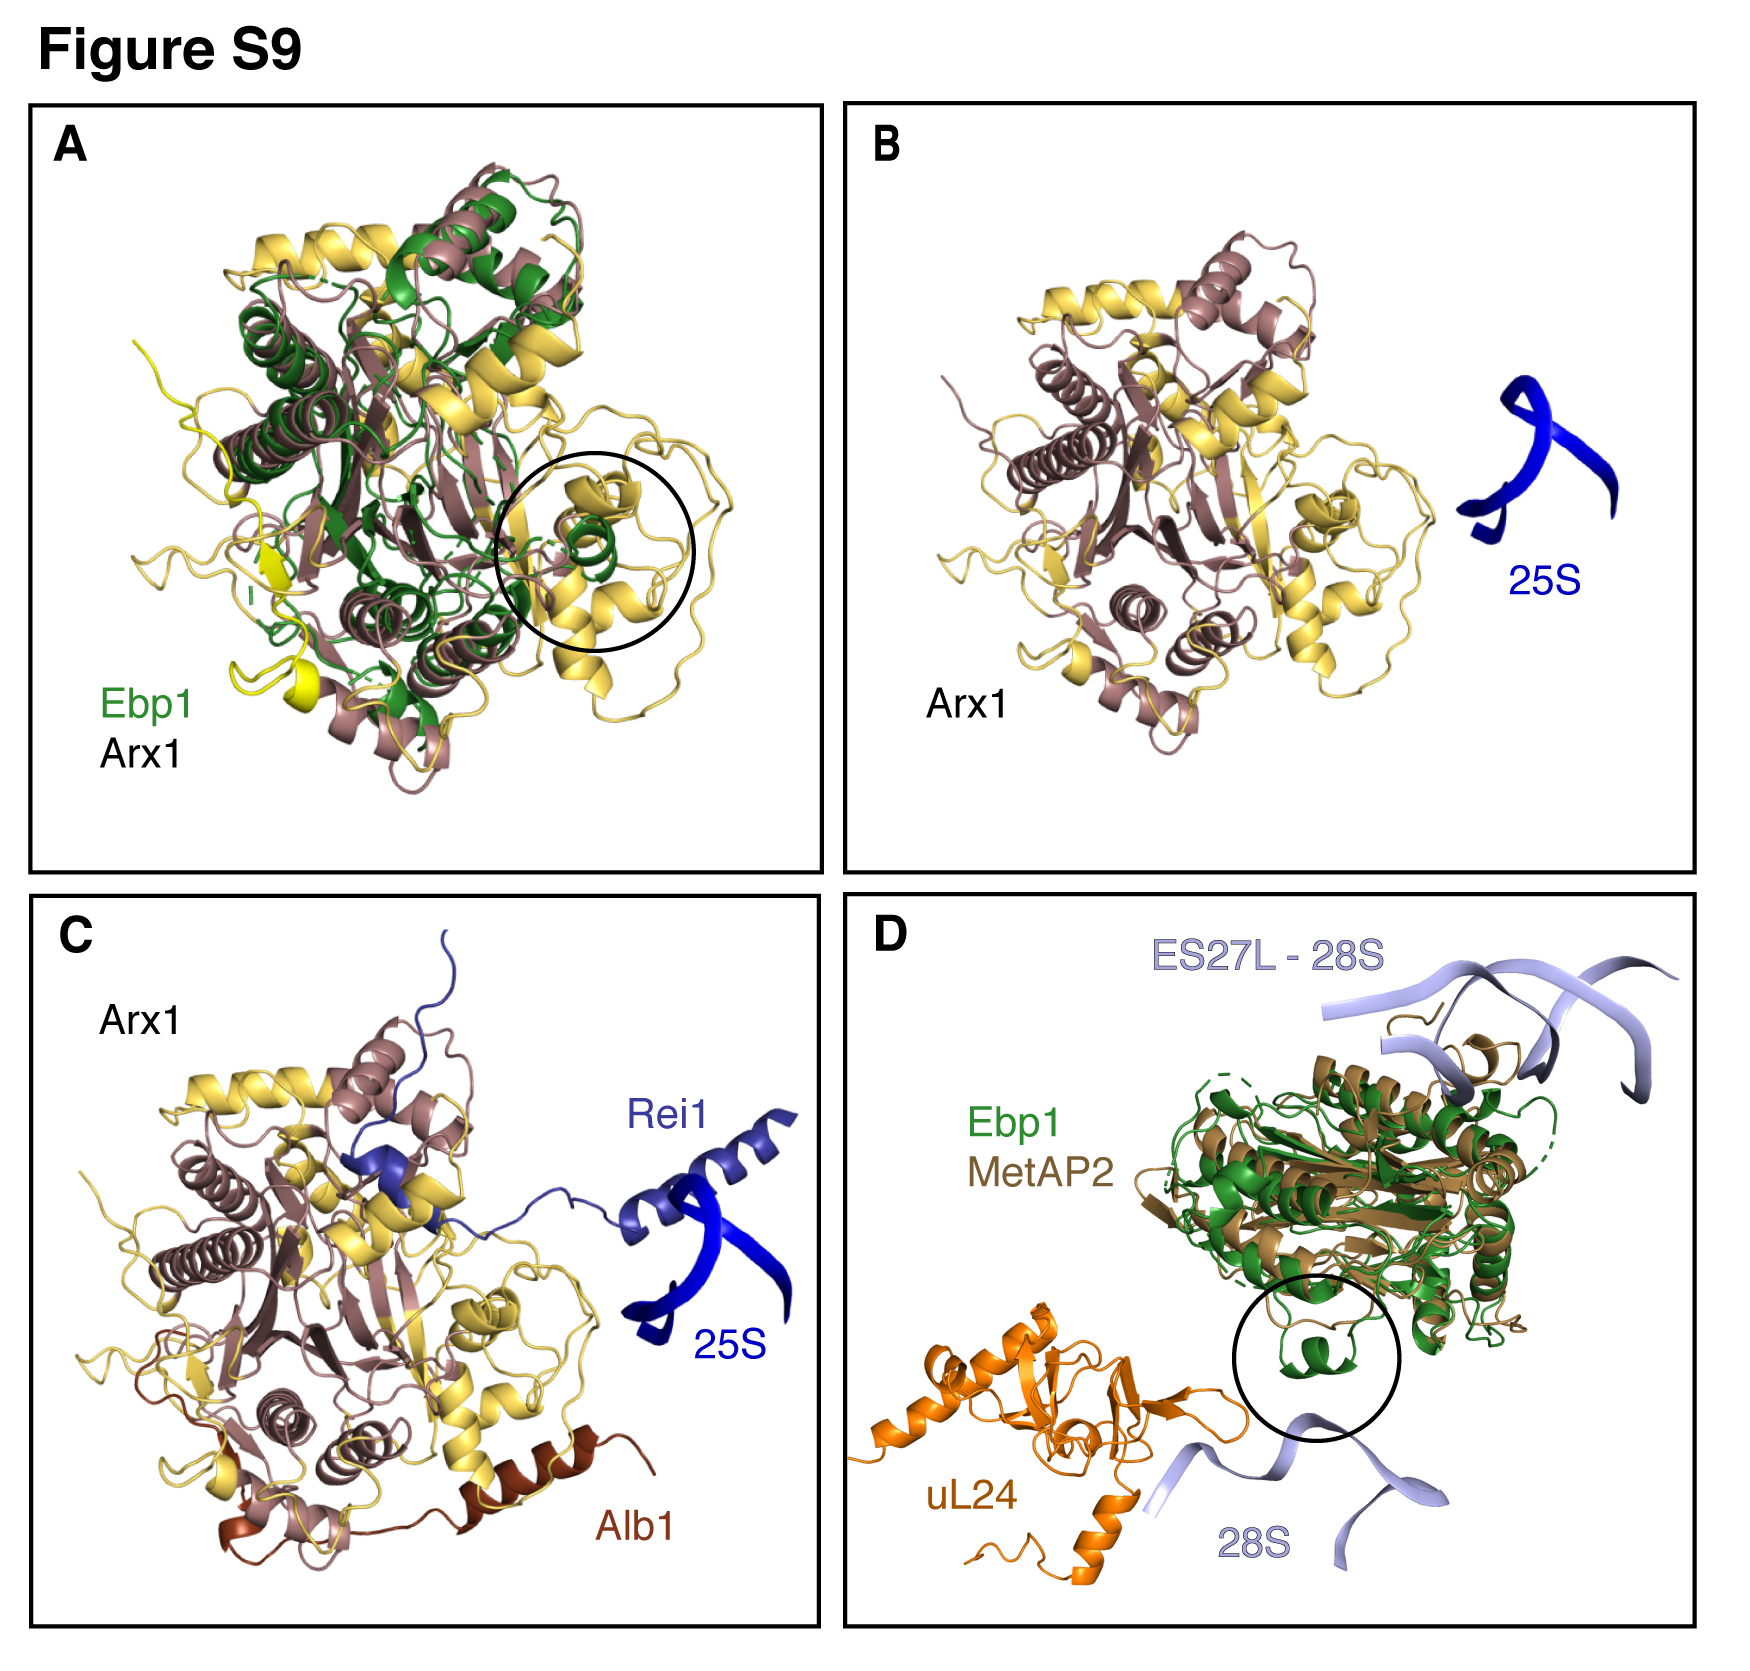


**Supplemental figure S9:** Comparison of human Ebp1–ribosome complex with yeast Arx1–60S complex and human MetAP2. (A) Superposition of human Ebp1 (green) on yeast Arx1 (dark beige and yellow-orange). Structurally aligned regions of Arx1 (PDB: 5APN) are show in dark beige while additional insertion regions of Arx1 are shown in yellow-orange. (B) Interaction of insertion region of yeast Arx1 (dark beige and yellow-orange) with 25S rRNA region 379-381 (blue) (PDB: 5APN) that is a structural equivalent of the Ebp1 helix5 interaction with 28S rRNA region 389-391. (C) Interaction of insertion region of yeast Arx1 (dark beige and yellow-orange) with 25S rRNA region 379-381 (blue), Rei1 (dark blue) and Alb1 (dark brown) (PDB: 5APN). (D) Superposition of MetAP2 (brown) (PDB: 1KQ0) on Ebp1 (as shown in Fig. 4A) proteins.

**
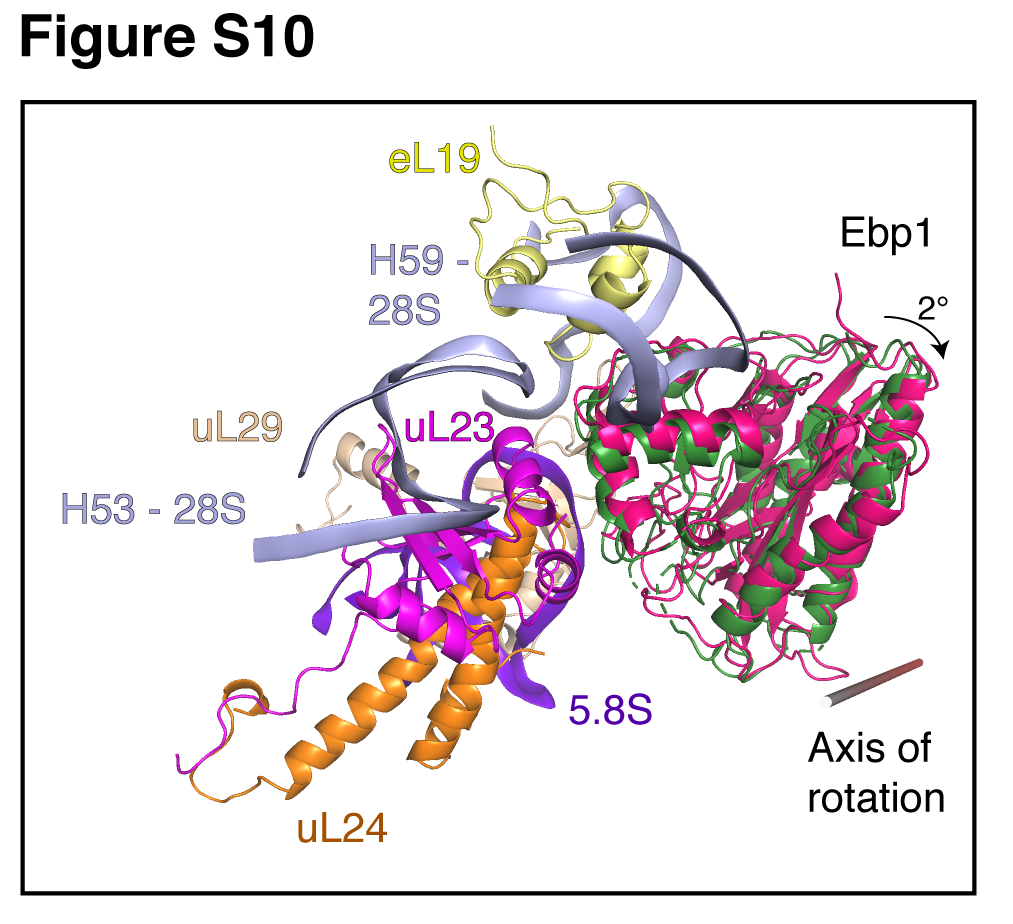
**

**Supplemental figure S10:** Conformationchange in Ebp1 observed in the structure reported in this study (green) and by Liang et al. (hot pink). eL19 (yellow), uL23 (magenta), uL24 (orange) and uL29 (wheat) proteins are represented as cartoons. Fragment of 5.8S rRNA (purple) and H53 and H59 of the 28S rRNA (light blue) are shown as cartoons. The axis of rotation and the angle of rotation are indicated.


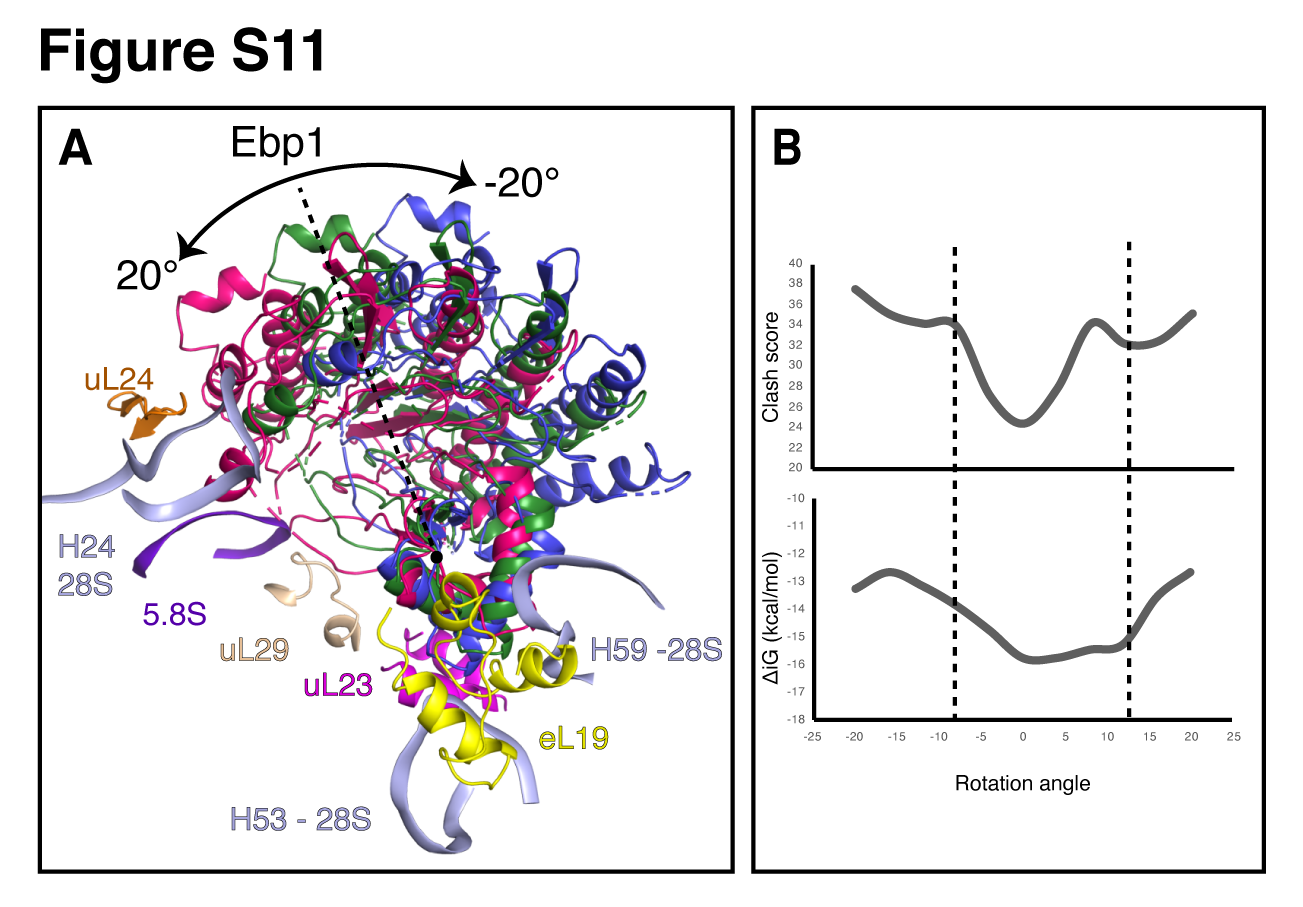


**Supplemental figure S11:** Evaluating the effect of Ebp1 rotation on ribosome binding. (A) Generation of multiple Ebp1 atomic models that are rotated around the observed rotation axis (as in Fig. 3) (represented as a black dot) with respect to the ribosome. For clarity, rotation in the positive and negative directions by 20o are shown in magenta and blue, respectively. The conformations of Ebp1 observed by cryo-EM is displayed in green (as in Fig. 3). (B) Clash scores and solvation free energy gain calculated for atomic models containing different conformations of Ebp1.

**Supplemental movie S1:** Morphing of two conformations of Ebp1 (shown in green and light pink) with respect to the ribosome. Ribosomal proteins and RNAs are shown in colors as in Figure 3.

**Supplementary table S1:** Cryo-EM data collection, processing and model validation

| **Data collection** |  |
| --- | --- |
| Microscope | Titan Krios |
| Camera | Gatan K2 Summit |
| Voltage (kV) | 300 |
| Magnification (calibrated) | 58140 |
| Defocus range (μm) | 0.5 - 2.5 |
| Pixel size (Å) | 0.86 |
| Total micrographs | Dataset-1 : 6645 |
|  | Dataset-2 : 973 |
| **Reconstruction** |  |
|  |  |
| Final particles | 20500 |
| Resolution global FSC (Å) | 3.28 |
|  |  |
| **Model** |  |
| Nonhydrogen atoms | 136812 |
| Protein residues | 6433 |
| RNA residues | 3956 |
|  |  |
| **Validation** |  |
| MapCC_mask (global) | 0.83 |
| *R.m.s. deviation* |  |
| Bond lengths (Å) | 0.007 |
| Bond angles (°) | 0.763 |
| Clashscore | 21.58 |
| *Ramachandran plot* |  |
| Favored (%) | 89.04 |
| Allowed (%) | 10.89 |
| Rotamer outliers (%) | 0.06 |

**Supplementary table S2:** List of proteins detected by mass spectrometry in the purified samples, using the protocols of Khatter *et al.* or Bhaskar *et al*. with modifications. The row showing the presence of Ebp1 in the samples is highlighted.

**Supplementary table S3:** Analysis of Ebp1–60S interface observed in various reported structures. The residues of Ebp1 that are involved in interaction with more than one RNA and/or polypeptide are indicated by bold, italics fonts and underlined. Residues involved in polar interactions are indicated in red color. * Helix 59 of 28S rRNA is unmodelled in the PDB ID 6LSR structure. Hence fewer number of interactions between Ebp1 and 28S rRNA are listed here.

**Supplementary table S4:** Angle of rotation of Ebp1 with respect to 60S in comparison to PDB:6SX0. * The axis of rotation is slightly inclined in comparison with axis of rotation observed in other structures.

| **PDB ID** | **Angle (°)** |
| --- | --- |
| 7BHP(This study) | 8.48 |
| 6ZMO | 9.26 |
| 6Z6L | 9.32 |
| 6SWA | 8.53 |
| 6LSR* | 9.36 |
