# Supplementary material
Source: HighWire-hosted journal article supplement (doi:10.1101/rna.077602.120)
Supplement: Supplemental_Table_S2.xlsx [file Supplemental_Table_S2.xlsx]

## Sheet: Samples Report With Clusters fo
									Total Spectrum Count	Total Spectrum Count	Total Spectrum Count	Total Spectrum Count
201111_desojess_508_1993_swp_human									MASCOT swp human con	MASCOT swp human con	MQ human con	MQ human con
#	Visible?	Starred?	Identified Proteins (920)	Accession Number	Alternate ID	Molecular Weight	Protein Grouping Ambiguity	Taxonomy	S01 (Khatter et al)	S02 (Bhaskar et al)	S01 MQ (Khatter et al)	S02 MQ (Bhaskar et al)
1	TRUE	Empty	Cluster of Heat shock 70 kDa protein 1A OS=Homo sapiens GN=HSPA1A PE=1 SV=1 (P0DMV8)	P0DMV8 [3]	HSPA1A	70 kDa	TRUE	unknown	1695	243	6396	914
1.1	TRUE	Empty	Heat shock 70 kDa protein 1A OS=Homo sapiens GN=HSPA1A PE=1 SV=1	P0DMV8 (+1)	HSPA1A	70 kDa	TRUE	unknown	1692	242	5967	880
1.2	TRUE	Empty	Heat shock 70 kDa protein 6 OS=Homo sapiens GN=HSPA6 PE=1 SV=2	P17066	HSPA6	71 kDa	TRUE	unknown	0	33	1684	0
2	TRUE	Empty	Cluster of Heat shock protein HSP 90-alpha OS=Homo sapiens GN=HSP90AA1 PE=1 SV=5 (P07900)	P07900 [6]	HSP90AA1	85 kDa	TRUE	unknown	751	5	3509	4
2.1	TRUE	Empty	Heat shock protein HSP 90-alpha OS=Homo sapiens GN=HSP90AA1 PE=1 SV=5	P07900	HSP90AA1	85 kDa	TRUE	unknown	576	2	2323	4
2.2	TRUE	Empty	Heat shock protein HSP 90-beta OS=Homo sapiens GN=HSP90AB1 PE=1 SV=4	P08238	HSP90AB1	83 kDa	TRUE	unknown	472	3	2003	4
2.3	TRUE	Empty	Putative heat shock protein HSP 90-beta 2 OS=Homo sapiens GN=HSP90AB2P PE=1 SV=2	Q58FF8	HSP90AB2P	44 kDa	TRUE	unknown	121	0	449	0
2.4	TRUE	Empty	Putative heat shock protein HSP 90-beta 4 OS=Homo sapiens GN=HSP90AB4P PE=5 SV=1	Q58FF6	HSP90AB4P	58 kDa	TRUE	unknown	0	2	365	0
2.5	TRUE	Empty	Heat shock protein HSP 90-alpha A2 OS=Homo sapiens GN=HSP90AA2P PE=1 SV=2	Q14568	HSP90AA2P	39 kDa	TRUE	unknown	88	0	0	0
2.6	TRUE	Empty	Putative heat shock protein HSP 90-alpha A4 OS=Homo sapiens GN=HSP90AA4P PE=5 SV=1	Q58FG1	HSP90AA4P	48 kDa	TRUE	unknown	0	0	0	0
3	TRUE	Empty	40S ribosomal protein S3 OS=Homo sapiens GN=RPS3 PE=1 SV=2	P23396	RPS3	27 kDa		unknown	149	400	577	1781
4	TRUE	Empty	60S ribosomal protein L5 OS=Homo sapiens GN=RPL5 PE=1 SV=3	P46777	RPL5	34 kDa		unknown	84	331	414	1864
5	TRUE	Empty	Receptor of activated protein C kinase 1 OS=Homo sapiens GN=RACK1 PE=1 SV=3	P63244	RACK1	35 kDa		unknown	78	339	398	1822
6	TRUE	Empty	40S ribosomal protein S4, X isoform OS=Homo sapiens GN=RPS4X PE=1 SV=2	P62701	RPS4X	30 kDa		unknown	89	348	355	1693
7	TRUE	Empty	Cluster of 60S acidic ribosomal protein P2 OS=Homo sapiens GN=RPLP2 PE=1 SV=1 (P05387)	P05387 [2]	RPLP2	12 kDa	TRUE	unknown	81	370	356	1723
7.1	TRUE	Empty	60S acidic ribosomal protein P2 OS=Homo sapiens GN=RPLP2 PE=1 SV=1	P05387	RPLP2	12 kDa	TRUE	unknown	81	370	356	1718
7.2	TRUE	Empty	H0YDD8	H0YDD8		?	TRUE	unknown	0	0	187	582
8	TRUE	Empty	40S ribosomal protein S8 OS=Homo sapiens GN=RPS8 PE=1 SV=2	P62241	RPS8	24 kDa		unknown	67	298	338	1648
9	TRUE	Empty	Nucleolin OS=Homo sapiens GN=NCL PE=1 SV=3	P19338	NCL	77 kDa		unknown	105	361	396	1310
10	TRUE	Empty	60S ribosomal protein L4 OS=Homo sapiens GN=RPL4 PE=1 SV=5	P36578	RPL4	48 kDa		unknown	139	280	599	997
11	TRUE	Empty	T-complex protein 1 subunit theta OS=Homo sapiens GN=CCT8 PE=1 SV=4	P50990	CCT8	60 kDa		unknown	337	62	1334	285
12	TRUE	Empty	Cluster of CON__P15636	CON__P15636 [2]		?	TRUE	unknown	112	162	615	983
12.1	TRUE	Empty	CON__P15636	CON__P15636		?	TRUE	unknown	0	0	615	983
12.2	TRUE	Empty	CON_P15636 API_ACHLY Protease 1 OS=Achromobacter lyticus PE=1 SV=1	CON_P15636 API_ACHLY Protease 1 OS=Achromobacter lyticus PE=1 SV=1		68 kDa	TRUE	unknown	112	162	0	0
13	TRUE	Empty	60S ribosomal protein L7 OS=Homo sapiens GN=RPL7 PE=1 SV=1	P18124	RPL7	29 kDa		unknown	58	252	238	1280
14	TRUE	Empty	Cluster of Heat shock cognate 71 kDa protein OS=Homo sapiens GN=HSPA8 PE=1 SV=1 (P11142)	P11142 [2]	HSPA8	71 kDa	TRUE	unknown	407	42	1194	189
14.1	TRUE	Empty	Heat shock cognate 71 kDa protein OS=Homo sapiens GN=HSPA8 PE=1 SV=1	P11142	HSPA8	71 kDa	TRUE	unknown	407	42	1186	186
14.2	TRUE	Empty	E9PK54	E9PK54		?	TRUE	unknown	0	0	626	125
15	TRUE	Empty	40S ribosomal protein S3a OS=Homo sapiens GN=RPS3A PE=1 SV=2	P61247	RPS3A	30 kDa		unknown	170	173	545	893
16	TRUE	Empty	Cluster of Tubulin beta chain OS=Homo sapiens GN=TUBB PE=1 SV=2 (P07437)	P07437 [8]	TUBB	50 kDa	TRUE	unknown	292	76	1091	298
16.1	TRUE	Empty	Tubulin beta chain OS=Homo sapiens GN=TUBB PE=1 SV=2	P07437	TUBB	50 kDa	TRUE	unknown	252	62	793	252
16.2	TRUE	Empty	Tubulin beta-4B chain OS=Homo sapiens GN=TUBB4B PE=1 SV=1	P68371	TUBB4B	50 kDa	TRUE	unknown	224	50	781	193
16.3	TRUE	Empty	Tubulin beta-2B chain OS=Homo sapiens GN=TUBB2B PE=1 SV=1	Q9BVA1	TUBB2B	50 kDa	TRUE	unknown	196	46	656	181
16.4	TRUE	Empty	Tubulin beta-8 chain OS=Homo sapiens GN=TUBB8 PE=1 SV=2	Q3ZCM7	TUBB8	50 kDa	TRUE	unknown	85	28	310	44
16.5	TRUE	Empty	Tubulin beta-8 chain-like protein LOC260334 OS=Homo sapiens PE=1 SV=1	A6NNZ2		50 kDa	TRUE	unknown	0	0	259	0
16.6	TRUE	Empty	Tubulin beta-3 chain OS=Homo sapiens GN=TUBB3 PE=1 SV=2	Q13509	TUBB3	50 kDa	TRUE	unknown	94	35	0	0
16.7	TRUE	Empty	Tubulin beta-6 chain OS=Homo sapiens GN=TUBB6 PE=1 SV=1	Q9BUF5	TUBB6	50 kDa	TRUE	unknown	54	22	0	0
16.8	TRUE	Empty	CON_ENSEMBL:ENSBTAP00000025008 (Bos taurus) hypothetical protein	CON_ENSEMBL:ENSBTAP00000025008 (Bos taurus) hypothetical protein		59 kDa	TRUE	unknown	14	12	0	0
17	TRUE	Empty	40S ribosomal protein S11 OS=Homo sapiens GN=RPS11 PE=1 SV=3	P62280	RPS11	18 kDa		unknown	37	293	153	1244
18	TRUE	Empty	40S ribosomal protein S2 OS=Homo sapiens GN=RPS2 PE=1 SV=2	P15880	RPS2	31 kDa		unknown	65	197	322	1132
19	TRUE	Empty	Cluster of Glyceraldehyde-3-phosphate dehydrogenase OS=Homo sapiens GN=GAPDH PE=1 SV=3 (P04406)	P04406 [2]	GAPDH	36 kDa	TRUE	unknown	324	1	1408	2
19.1	TRUE	Empty	Glyceraldehyde-3-phosphate dehydrogenase OS=Homo sapiens GN=GAPDH PE=1 SV=3	P04406	GAPDH	36 kDa	TRUE	unknown	324	1	1408	2
19.2	TRUE	Empty	CON_P10096 G3P_BOVIN Glyceraldehyde-3-phosphate dehydrogenase OS=Bos taurus GN=GAPDH PE=1 SV=4	CON_P10096 G3P_BOVIN Glyceraldehyde-3-phosphate dehydrogenase OS=Bos taurus GN=GAPDH PE=1 SV=4		36 kDa	TRUE	unknown	0	0	0	0
20	TRUE	Empty	60S ribosomal protein L3 OS=Homo sapiens GN=RPL3 PE=1 SV=2	P39023	RPL3	46 kDa		unknown	75	196	400	983
21	TRUE	Empty	Bifunctional glutamate/proline--tRNA ligase OS=Homo sapiens GN=EPRS PE=1 SV=5	P07814	EPRS	171 kDa	TRUE	unknown	44	290	200	1131
22	TRUE	Empty	T-complex protein 1 subunit beta OS=Homo sapiens GN=CCT2 PE=1 SV=4	P78371	CCT2	57 kDa		unknown	261	31	1165	136
23	TRUE	Empty	60S ribosomal protein L18 OS=Homo sapiens GN=RPL18 PE=1 SV=2	Q07020 (+2)	RPL18	22 kDa		unknown	22	196	127	1184
24	TRUE	Empty	Alpha-enolase OS=Homo sapiens GN=ENO1 PE=1 SV=2	P06733	ENO1	47 kDa	TRUE	unknown	231	0	1291	0
25	TRUE	Empty	T-complex protein 1 subunit eta OS=Homo sapiens GN=CCT7 PE=1 SV=2	Q99832	CCT7	59 kDa		unknown	265	43	971	227
26	TRUE	Empty	T-complex protein 1 subunit gamma OS=Homo sapiens GN=CCT3 PE=1 SV=4	P49368	CCT3	61 kDa		unknown	253	60	913	275
27	TRUE	Empty	60S ribosomal protein L21 OS=Homo sapiens GN=RPL21 PE=1 SV=2	P46778	RPL21	19 kDa		unknown	39	249	164	994
28	TRUE	Empty	Cluster of T-complex protein 1 subunit zeta OS=Homo sapiens GN=CCT6A PE=1 SV=3 (P40227)	P40227 [2]	CCT6A	58 kDa	TRUE	unknown	275	55	919	172
28.1	TRUE	Empty	T-complex protein 1 subunit zeta OS=Homo sapiens GN=CCT6A PE=1 SV=3	P40227	CCT6A	58 kDa	TRUE	unknown	274	53	918	170
28.2	TRUE	Empty	T-complex protein 1 subunit zeta-2 OS=Homo sapiens GN=CCT6B PE=1 SV=5	Q92526	CCT6B	58 kDa	TRUE	unknown	98	24	321	40
29	TRUE	Empty	60S ribosomal protein L7a OS=Homo sapiens GN=RPL7A PE=1 SV=2	P62424	RPL7A	30 kDa		unknown	70	150	323	856
30	TRUE	Empty	40S ribosomal protein SA OS=Homo sapiens GN=RPSA PE=1 SV=4	P08865	RPSA	33 kDa		unknown	40	202	245	919
31	TRUE	Empty	T-complex protein 1 subunit epsilon OS=Homo sapiens GN=CCT5 PE=1 SV=1	P48643	CCT5	60 kDa		unknown	210	29	981	171
32	TRUE	Empty	60S ribosomal protein L13a OS=Homo sapiens GN=RPL13A PE=1 SV=2	P40429	RPL13A	24 kDa		unknown	32	271	23	1062
33	TRUE	Empty	Fatty acid synthase OS=Homo sapiens GN=FASN PE=1 SV=3	P49327	FASN	273 kDa		unknown	255	2	1126	4
34	TRUE	Empty	60S ribosomal protein L6 OS=Homo sapiens GN=RPL6 PE=1 SV=3	Q02878	RPL6	33 kDa		unknown	68	181	279	836
35	TRUE	Empty	Cytoplasmic dynein 1 heavy chain 1 OS=Homo sapiens GN=DYNC1H1 PE=1 SV=5	Q14204	DYNC1H1	532 kDa		unknown	65	218	259	821
36	TRUE	Empty	60S ribosomal protein L10a OS=Homo sapiens GN=RPL10A PE=1 SV=2	P62906	RPL10A	25 kDa		unknown	78	177	222	870
37	TRUE	Empty	60S ribosomal protein L30 OS=Homo sapiens GN=RPL30 PE=1 SV=2	P62888	RPL30	13 kDa		unknown	33	193	125	965
38	TRUE	Empty	Cluster of Actin, cytoplasmic 2 OS=Homo sapiens GN=ACTG1 PE=1 SV=1 (P63261)	P63261 [7]	ACTG1	42 kDa	TRUE	unknown	249	22	875	142
38.1	TRUE	Empty	Actin, cytoplasmic 2 OS=Homo sapiens GN=ACTG1 PE=1 SV=1	P63261	ACTG1	42 kDa	TRUE	unknown	208	19	694	115
38.2	TRUE	Empty	Actin, cytoplasmic 1 OS=Homo sapiens GN=ACTB PE=1 SV=1	P60709	ACTB	42 kDa	TRUE	unknown	211	20	687	112
38.3	TRUE	Empty	Actin, alpha skeletal muscle OS=Homo sapiens GN=ACTA1 PE=1 SV=1	P68133	ACTA1	42 kDa	TRUE	unknown	177	8	597	82
38.4	TRUE	Empty	POTE ankyrin domain family member F OS=Homo sapiens GN=POTEF PE=1 SV=2	A5A3E0	POTEF	121 kDa	TRUE	unknown	84	4	294	42
38.5	TRUE	Empty	POTE ankyrin domain family member I OS=Homo sapiens GN=POTEI PE=3 SV=1	P0CG38	POTEI	121 kDa	TRUE	unknown	71	0	221	26
38.6	TRUE	Empty	Beta-actin-like protein 2 OS=Homo sapiens GN=ACTBL2 PE=1 SV=2	Q562R1	ACTBL2	42 kDa	TRUE	unknown	45	5	171	23
38.7	TRUE	Empty	Putative beta-actin-like protein 3 OS=Homo sapiens GN=POTEKP PE=5 SV=1	Q9BYX7	POTEKP	42 kDa	TRUE	unknown	0	0	134	17
39	TRUE	Empty	Pyruvate kinase PKM OS=Homo sapiens GN=PKM PE=1 SV=4	P14618	PKM	58 kDa		unknown	236	0	998	0
40	TRUE	Empty	40S ribosomal protein S12 OS=Homo sapiens GN=RPS12 PE=1 SV=3	P25398	RPS12	15 kDa		unknown	35	180	158	860
41	TRUE	Empty	60S ribosomal protein L17 OS=Homo sapiens GN=RPL17 PE=1 SV=3	P18621	RPL17	21 kDa	TRUE	unknown	124	90	526	491
42	TRUE	Empty	60S ribosomal protein L18a OS=Homo sapiens GN=RPL18A PE=1 SV=2	Q02543	RPL18A	21 kDa		unknown	12	233	47	918
43	TRUE	Empty	40S ribosomal protein S10 OS=Homo sapiens GN=RPS10 PE=1 SV=1	P46783	RPS10	19 kDa		unknown	37	201	161	793
44	TRUE	Empty	40S ribosomal protein S21 OS=Homo sapiens GN=RPS21 PE=1 SV=1	P63220 (+1)	RPS21	9 kDa		unknown	16	229	67	857
45	TRUE	Empty	ATP synthase subunit alpha, mitochondrial OS=Homo sapiens GN=ATP5A1 PE=1 SV=1	P25705	ATP5A1	60 kDa		unknown	29	199	134	811
46	TRUE	Empty	Elongation factor 2 OS=Homo sapiens GN=EEF2 PE=1 SV=4	P13639	EEF2	95 kDa	TRUE	unknown	116	106	521	428
47	TRUE	Empty	40S ribosomal protein S18 OS=Homo sapiens GN=RPS18 PE=1 SV=3	P62269	RPS18	18 kDa		unknown	34	144	292	679
48	TRUE	Empty	Cluster of Polyadenylate-binding protein 1 OS=Homo sapiens GN=PABPC1 PE=1 SV=2 (P11940)	P11940 [4]	PABPC1	71 kDa	TRUE	unknown	65	141	181	769
48.1	TRUE	Empty	Polyadenylate-binding protein 1 OS=Homo sapiens GN=PABPC1 PE=1 SV=2	P11940	PABPC1	71 kDa	TRUE	unknown	65	140	181	769
48.2	TRUE	Empty	Polyadenylate-binding protein 3 OS=Homo sapiens GN=PABPC3 PE=1 SV=2	Q9H361	PABPC3	70 kDa	TRUE	unknown	30	71	108	410
48.3	TRUE	Empty	Polyadenylate-binding protein 1-like OS=Homo sapiens GN=PABPC1L PE=2 SV=1	Q4VXU2	PABPC1L	68 kDa	TRUE	unknown	12	34	64	146
48.4	TRUE	Empty	Polyadenylate-binding protein 5 OS=Homo sapiens GN=PABPC5 PE=2 SV=1	Q96DU9	PABPC5	43 kDa	TRUE	unknown	0	0	0	0
49	TRUE	Empty	Cluster of 60S acidic ribosomal protein P0 OS=Homo sapiens GN=RPLP0 PE=1 SV=1 (P05388)	P05388 [2]	RPLP0	34 kDa	TRUE	unknown	27	143	234	720
49.1	TRUE	Empty	60S acidic ribosomal protein P0 OS=Homo sapiens GN=RPLP0 PE=1 SV=1	P05388	RPLP0	34 kDa	TRUE	unknown	27	143	234	720
49.2	TRUE	Empty	60S acidic ribosomal protein P0-like OS=Homo sapiens GN=RPLP0P6 PE=5 SV=1	Q8NHW5	RPLP0P6	34 kDa	TRUE	unknown	0	120	158	618
50	TRUE	Empty	40S ribosomal protein S16 OS=Homo sapiens GN=RPS16 PE=1 SV=2	P62249	RPS16	16 kDa		unknown	66	161	214	663
51	TRUE	Empty	60S ribosomal protein L32 OS=Homo sapiens GN=RPL32 PE=1 SV=2	P62910	RPL32	16 kDa		unknown	30	131	171	745
52	TRUE	Empty	T-complex protein 1 subunit alpha OS=Homo sapiens GN=TCP1 PE=1 SV=1	P17987	TCP1	60 kDa		unknown	167	44	661	223
53	TRUE	Empty	60S ribosomal protein L37a OS=Homo sapiens GN=RPL37A PE=1 SV=2	P61513	RPL37A	10 kDa		unknown	18	179	64	774
54	TRUE	Empty	Proliferation-associated protein 2G4 OS=Homo sapiens GN=PA2G4 PE=1 SV=3	Q9UQ80	PA2G4	44 kDa		unknown	59	98	328	525
55	TRUE	Empty	14-3-3 protein epsilon OS=Homo sapiens GN=YWHAE PE=1 SV=1	P62258	YWHAE	29 kDa	TRUE	unknown	193	1	809	1
56	TRUE	Empty	40S ribosomal protein S14 OS=Homo sapiens GN=RPS14 PE=1 SV=3	P62263	RPS14	16 kDa		unknown	28	152	153	657
57	TRUE	Empty	40S ribosomal protein S17 OS=Homo sapiens GN=RPS17 PE=1 SV=2	P08708	RPS17	16 kDa		unknown	21	184	95	681
58	TRUE	Empty	Cluster of Plasminogen activator inhibitor 1 RNA-binding protein OS=Homo sapiens GN=SERBP1 PE=1 SV=2 (Q8NC51)	Q8NC51 [2]	SERBP1	45 kDa	TRUE	unknown	31	83	135	724
58.1	TRUE	Empty	Plasminogen activator inhibitor 1 RNA-binding protein OS=Homo sapiens GN=SERBP1 PE=1 SV=2	Q8NC51	SERBP1	45 kDa	TRUE	unknown	31	83	135	627
58.2	TRUE	Empty	Isoform 3 of Plasminogen activator inhibitor 1 RNA-binding protein OS=Homo sapiens GN=SERBP1	Q8NC51-3	SERBP1	43 kDa	TRUE	unknown	0	0	118	668
59	TRUE	Empty	60S ribosomal protein L13 OS=Homo sapiens GN=RPL13 PE=1 SV=4	P26373	RPL13	24 kDa		unknown	36	127	153	646
60	TRUE	Empty	ATP synthase subunit beta, mitochondrial OS=Homo sapiens GN=ATP5B PE=1 SV=3	P06576	ATP5B	57 kDa		unknown	53	111	268	518
61	TRUE	Empty	60S ribosomal protein L14 OS=Homo sapiens GN=RPL14 PE=1 SV=4	P50914	RPL14	23 kDa		unknown	23	133	123	675
62	TRUE	Empty	Cluster of Myosin-9 OS=Homo sapiens GN=MYH9 PE=1 SV=4 (P35579)	P35579 [4]	MYH9	227 kDa	TRUE	unknown	176	6	779	3
62.1	TRUE	Empty	Myosin-9 OS=Homo sapiens GN=MYH9 PE=1 SV=4	P35579	MYH9	227 kDa	TRUE	unknown	125	2	505	3
62.2	TRUE	Empty	Myosin-10 OS=Homo sapiens GN=MYH10 PE=1 SV=3	P35580	MYH10	229 kDa	TRUE	unknown	71	0	301	0
62.3	TRUE	Empty	Myosin-11 OS=Homo sapiens GN=MYH11 PE=1 SV=3	P35749	MYH11	227 kDa	TRUE	unknown	28	2	50	0
62.4	TRUE	Empty	Myosin-14 OS=Homo sapiens GN=MYH14 PE=1 SV=2	Q7Z406	MYH14	228 kDa	TRUE	unknown	21	4	42	0
63	TRUE	Empty	40S ribosomal protein S9 OS=Homo sapiens GN=RPS9 PE=1 SV=3	P46781	RPS9	23 kDa		unknown	39	192	116	598
64	TRUE	Empty	Cluster of Elongation factor 1-alpha 1 OS=Homo sapiens GN=EEF1A1 PE=1 SV=1 (P68104)	P68104 [3]	EEF1A1	50 kDa	TRUE	unknown	183	6	723	26
64.1	TRUE	Empty	Elongation factor 1-alpha 1 OS=Homo sapiens GN=EEF1A1 PE=1 SV=1	P68104 (+1)	EEF1A1	50 kDa	TRUE	unknown	180	6	707	26
64.2	TRUE	Empty	Elongation factor 1-alpha 2 OS=Homo sapiens GN=EEF1A2 PE=1 SV=1	Q05639	EEF1A2	50 kDa	TRUE	unknown	89	0	323	24
65	TRUE	Empty	Cluster of 40S ribosomal protein S27 OS=Homo sapiens GN=RPS27 PE=1 SV=3 (P42677)	P42677 [3]	RPS27	9 kDa	TRUE	unknown	16	148	77	658
65.1	TRUE	Empty	40S ribosomal protein S27 OS=Homo sapiens GN=RPS27 PE=1 SV=3	P42677	RPS27	9 kDa	TRUE	unknown	16	141	76	613
65.2	TRUE	Empty	40S ribosomal protein S27-like OS=Homo sapiens GN=RPS27L PE=1 SV=3	Q71UM5 (+1)	RPS27L	9 kDa	TRUE	unknown	14	126	53	508
66	TRUE	Empty	40S ribosomal protein S6 OS=Homo sapiens GN=RPS6 PE=1 SV=1	P62753	RPS6	29 kDa		unknown	42	132	181	544
67	TRUE	Empty	60S ribosomal protein L12 OS=Homo sapiens GN=RPL12 PE=1 SV=1	P30050	RPL12	18 kDa		unknown	23	132	143	606
68	TRUE	Empty	40S ribosomal protein S13 OS=Homo sapiens GN=RPS13 PE=1 SV=2	P62277	RPS13	17 kDa		unknown	82	106	274	427
69	TRUE	Empty	Isoleucine--tRNA ligase, cytoplasmic OS=Homo sapiens GN=IARS PE=1 SV=2	P41252	IARS	145 kDa		unknown	13	149	43	675
70	TRUE	Empty	Cluster of Nuclease-sensitive element-binding protein 1 OS=Homo sapiens GN=YBX1 PE=1 SV=3 (P67809)	P67809 [3]	YBX1	36 kDa	TRUE	unknown	55	126	253	446
70.1	TRUE	Empty	Nuclease-sensitive element-binding protein 1 OS=Homo sapiens GN=YBX1 PE=1 SV=3	P67809	YBX1	36 kDa	TRUE	unknown	44	109	206	372
70.2	TRUE	Empty	Y-box-binding protein 3 OS=Homo sapiens GN=YBX3 PE=1 SV=4	P16989	YBX3	40 kDa	TRUE	unknown	27	79	105	239
70.3	TRUE	Empty	Y-box-binding protein 2 OS=Homo sapiens GN=YBX2 PE=1 SV=2	Q9Y2T7	YBX2	39 kDa	TRUE	unknown	0	0	0	0
71	TRUE	Empty	40S ribosomal protein S24 OS=Homo sapiens GN=RPS24 PE=1 SV=1	P62847	RPS24	15 kDa		unknown	55	132	122	567
72	TRUE	Empty	40S ribosomal protein S19 OS=Homo sapiens GN=RPS19 PE=1 SV=2	P39019	RPS19	16 kDa		unknown	51	125	157	515
73	TRUE	Empty	Stress-induced-phosphoprotein 1 OS=Homo sapiens GN=STIP1 PE=1 SV=1	P31948	STIP1	63 kDa		unknown	203	0	656	1
74	TRUE	Empty	40S ribosomal protein S5 OS=Homo sapiens GN=RPS5 PE=1 SV=4	P46782	RPS5	23 kDa		unknown	42	190	126	459
75	TRUE	Empty	Cluster of Polyadenylate-binding protein 4 OS=Homo sapiens GN=PABPC4 PE=1 SV=1 (Q13310)	Q13310 [3]	PABPC4	71 kDa	TRUE	unknown	51	112	130	524
75.1	TRUE	Empty	Polyadenylate-binding protein 4 OS=Homo sapiens GN=PABPC4 PE=1 SV=1	Q13310	PABPC4	71 kDa	TRUE	unknown	50	112	130	522
75.2	TRUE	Empty	Isoform 3 of Polyadenylate-binding protein 4 OS=Homo sapiens GN=PABPC4	Q13310-3	PABPC4	72 kDa	TRUE	unknown	0	0	130	524
75.3	TRUE	Empty	Polyadenylate-binding protein 4-like OS=Homo sapiens GN=PABPC4L PE=2 SV=1	P0CB38	PABPC4L	42 kDa	TRUE	unknown	2	0	0	0
76	TRUE	Empty	Peroxiredoxin-1 OS=Homo sapiens GN=PRDX1 PE=1 SV=1	Q06830	PRDX1	22 kDa	TRUE	unknown	119	0	700	0
77	TRUE	Empty	Transitional endoplasmic reticulum ATPase OS=Homo sapiens GN=VCP PE=1 SV=4	P55072	VCP	89 kDa		unknown	139	1	652	1
78	TRUE	Empty	60S ribosomal protein L9 OS=Homo sapiens GN=RPL9 PE=1 SV=1	P32969	RPL9	22 kDa		unknown	18	135	33	597
79	TRUE	Empty	Cluster of Inosine-5'-monophosphate dehydrogenase 2 OS=Homo sapiens GN=IMPDH2 PE=1 SV=2 (P12268)	P12268 [2]	IMPDH2	56 kDa	TRUE	unknown	141	2	634	5
79.1	TRUE	Empty	Inosine-5'-monophosphate dehydrogenase 2 OS=Homo sapiens GN=IMPDH2 PE=1 SV=2	P12268	IMPDH2	56 kDa	TRUE	unknown	141	2	634	5
79.2	TRUE	Empty	Inosine-5'-monophosphate dehydrogenase 1 OS=Homo sapiens GN=IMPDH1 PE=1 SV=2	P20839	IMPDH1	55 kDa	TRUE	unknown	10	0	0	0
80	TRUE	Empty	40S ribosomal protein S20 OS=Homo sapiens GN=RPS20 PE=1 SV=1	P60866	RPS20	13 kDa		unknown	181	61	391	130
81	TRUE	Empty	60S ribosomal protein L24 OS=Homo sapiens GN=RPL24 PE=1 SV=1	P83731	RPL24	18 kDa		unknown	33	87	109	516
82	TRUE	Empty	T-complex protein 1 subunit delta OS=Homo sapiens GN=CCT4 PE=1 SV=4	P50991	CCT4	58 kDa		unknown	129	24	504	99
83	TRUE	Empty	60S acidic ribosomal protein P1 OS=Homo sapiens GN=RPLP1 PE=1 SV=1	P05386	RPLP1	12 kDa	TRUE	unknown	31	133	142	434
84	TRUE	Empty	60S ribosomal protein L28 OS=Homo sapiens GN=RPL28 PE=1 SV=3	P46779	RPL28	16 kDa		unknown	35	64	118	511
85	TRUE	Empty	Cluster of Elongation factor 1-delta OS=Homo sapiens GN=EEF1D PE=1 SV=5 (P29692)	P29692 [2]	EEF1D	31 kDa	TRUE	unknown	144	5	556	31
85.1	TRUE	Empty	Elongation factor 1-delta OS=Homo sapiens GN=EEF1D PE=1 SV=5	P29692	EEF1D	31 kDa	TRUE	unknown	144	5	549	31
85.2	TRUE	Empty	Isoform 3 of Elongation factor 1-delta OS=Homo sapiens GN=EEF1D	P29692-3	EEF1D	29 kDa	TRUE	unknown	0	0	401	20
86	TRUE	Empty	Aspartate--tRNA ligase, cytoplasmic OS=Homo sapiens GN=DARS PE=1 SV=2	P14868	DARS	57 kDa		unknown	7	129	36	558
87	TRUE	Empty	Cluster of Tubulin alpha-1B chain OS=Homo sapiens GN=TUBA1B PE=1 SV=1 (P68363)	P68363 [4]	TUBA1B	50 kDa	TRUE	unknown	122	21	449	125
87.1	TRUE	Empty	Tubulin alpha-1B chain OS=Homo sapiens GN=TUBA1B PE=1 SV=1	P68363	TUBA1B	50 kDa	TRUE	unknown	120	20	429	125
87.2	TRUE	Empty	Tubulin alpha-4A chain OS=Homo sapiens GN=TUBA4A PE=1 SV=1	P68366	TUBA4A	50 kDa	TRUE	unknown	88	0	317	85
87.3	TRUE	Empty	Tubulin alpha-8 chain OS=Homo sapiens GN=TUBA8 PE=1 SV=1	Q9NY65	TUBA8	50 kDa	TRUE	unknown	53	7	200	50
87.4	TRUE	Empty	Tubulin alpha chain-like 3 OS=Homo sapiens GN=TUBAL3 PE=1 SV=2	A6NHL2	TUBAL3	50 kDa	TRUE	unknown	4	0	13	26
88	TRUE	Empty	Lysine--tRNA ligase OS=Homo sapiens GN=KARS PE=1 SV=3	Q15046	KARS	68 kDa		unknown	39	104	79	481
89	TRUE	Empty	40S ribosomal protein S28 OS=Homo sapiens GN=RPS28 PE=1 SV=1	P62857	RPS28	8 kDa		unknown	24	99	116	452
90	TRUE	Empty	Cluster of Fructose-bisphosphate aldolase A OS=Homo sapiens GN=ALDOA PE=1 SV=2 (P04075)	P04075 [2]	ALDOA	39 kDa	TRUE	unknown	147	0	549	0
90.1	TRUE	Empty	Fructose-bisphosphate aldolase A OS=Homo sapiens GN=ALDOA PE=1 SV=2	P04075	ALDOA	39 kDa	TRUE	unknown	145	0	537	0
90.2	TRUE	Empty	Fructose-bisphosphate aldolase C OS=Homo sapiens GN=ALDOC PE=1 SV=2	P09972	ALDOC	39 kDa	TRUE	unknown	26	0	94	0
91	TRUE	Empty	60S ribosomal protein L15 OS=Homo sapiens GN=RPL15 PE=1 SV=2	P61313	RPL15	24 kDa		unknown	23	90	58	511
92	TRUE	Empty	Endoplasmin OS=Homo sapiens GN=HSP90B1 PE=1 SV=1	P14625	HSP90B1	92 kDa	TRUE	unknown	111	1	559	0
93	TRUE	Empty	Heterogeneous nuclear ribonucleoprotein U OS=Homo sapiens GN=HNRNPU PE=1 SV=6	Q00839	HNRNPU	91 kDa	TRUE	unknown	55	101	182	333
94	TRUE	Empty	60S ribosomal protein L23 OS=Homo sapiens GN=RPL23 PE=1 SV=1	P62829	RPL23	15 kDa		unknown	14	129	76	437
95	TRUE	Empty	Cluster of 78 kDa glucose-regulated protein OS=Homo sapiens GN=HSPA5 PE=1 SV=2 (P11021)	P11021 [2]	HSPA5	72 kDa	TRUE	unknown	149	23	397	88
95.1	TRUE	Empty	78 kDa glucose-regulated protein OS=Homo sapiens GN=HSPA5 PE=1 SV=2	P11021	HSPA5	72 kDa	TRUE	unknown	0	0	397	88
95.2	TRUE	Empty	Endoplasmic reticulum chaperone BiP OS=Homo sapiens OX=9606 GN=HSPA5 PE=1 SV=2	sp|P11021|BIP_HUMAN		?	TRUE	unknown	149	23	0	0
96	TRUE	Empty	40S ribosomal protein S23 OS=Homo sapiens GN=RPS23 PE=1 SV=3	P62266	RPS23	16 kDa		unknown	18	57	61	517
97	TRUE	Empty	Cluster of 60S ribosomal protein L10 OS=Homo sapiens GN=RPL10 PE=1 SV=4 (P27635)	P27635 [3]	RPL10	25 kDa	TRUE	unknown	64	58	180	329
97.1	TRUE	Empty	60S ribosomal protein L10 OS=Homo sapiens GN=RPL10 PE=1 SV=4	P27635	RPL10	25 kDa	TRUE	unknown	64	58	176	277
97.2	TRUE	Empty	A0A087WV22	A0A087WV22 (+1)		?	TRUE	unknown	0	0	170	269
98	TRUE	Empty	ATP-citrate synthase OS=Homo sapiens GN=ACLY PE=1 SV=3	P53396	ACLY	121 kDa		unknown	133	7	481	16
99	TRUE	Empty	60S ribosomal protein L27 OS=Homo sapiens GN=RPL27 PE=1 SV=2	P61353	RPL27	16 kDa		unknown	28	111	87	381
100	TRUE	Empty	Cluster of CAD protein OS=Homo sapiens GN=CAD PE=1 SV=3 (P27708)	P27708 [2]	CAD	243 kDa	TRUE	unknown	30	92	97	380
100.1	TRUE	Empty	CAD protein OS=Homo sapiens GN=CAD PE=1 SV=3	P27708	CAD	243 kDa	TRUE	unknown	29	90	97	380
100.2	TRUE	Empty	Carbamoyl-phosphate synthase [ammonia], mitochondrial OS=Homo sapiens GN=CPS1 PE=1 SV=2	P31327	CPS1	165 kDa	TRUE	unknown	1	5	0	0
101	TRUE	Empty	60S ribosomal protein L27a OS=Homo sapiens GN=RPL27A PE=1 SV=2	P46776	RPL27A	17 kDa		unknown	27	84	107	375
102	TRUE	Empty	L-lactate dehydrogenase B chain OS=Homo sapiens GN=LDHB PE=1 SV=2	P07195	LDHB	37 kDa	TRUE	unknown	133	0	436	0
103	TRUE	Empty	Arginine--tRNA ligase, cytoplasmic OS=Homo sapiens GN=RARS PE=1 SV=2	P54136	RARS	75 kDa		unknown	9	83	69	394
104	TRUE	Empty	Insulin receptor substrate 4 OS=Homo sapiens GN=IRS4 PE=1 SV=1	O14654	IRS4	134 kDa		unknown	106	11	396	45
105	TRUE	Empty	Cluster of Keratin, type II cytoskeletal 1 OS=Homo sapiens GN=KRT1 PE=1 SV=6 (P04264)	P04264 [24]	KRT1	66 kDa	TRUE	unknown	7	112	3	422
105.1	TRUE	Empty	Keratin, type II cytoskeletal 1 OS=Homo sapiens GN=KRT1 PE=1 SV=6	P04264	KRT1	66 kDa	TRUE	unknown	1	92	0	372
105.2	TRUE	Empty	Keratin, type II cytoskeletal 2 epidermal OS=Homo sapiens GN=KRT2 PE=1 SV=2	P35908	KRT2	65 kDa	TRUE	unknown	2	21	3	102
105.3	TRUE	Empty	Keratin, type II cytoskeletal 1b OS=Homo sapiens GN=KRT77 PE=2 SV=3	Q7Z794 (+1)	KRT77	62 kDa	TRUE	unknown	0	9	0	0
105.4	TRUE	Empty	Keratin, type II cytoskeletal 6A OS=Homo sapiens GN=KRT6A PE=1 SV=3	P02538	KRT6A	60 kDa	TRUE	unknown	2	5	0	20
105.5	TRUE	Empty	CON_ENSEMBL:ENSBTAP00000038253 (Bos taurus) 63 kDa protein	CON_ENSEMBL:ENSBTAP00000038253 (Bos taurus) 63 kDa protein		63 kDa	TRUE	unknown	0	27	0	0
105.6	TRUE	Empty	Keratin, type II cytoskeletal 2 oral OS=Homo sapiens GN=KRT76 PE=1 SV=2	Q01546 (+1)	KRT76	66 kDa	TRUE	unknown	0	0	0	0
105.7	TRUE	Empty	CON_Q9R0H5 K2C71_MOUSE Keratin, type II cytoskeletal 71 OS=Mus musculus GN=Krt71 PE=1 SV=1	CON_Q9R0H5 K2C71_MOUSE Keratin, type II cytoskeletal 71 OS=Mus musculus GN=Krt71 PE=1 SV=1		57 kDa	TRUE	unknown	4	0	0	0
105.8	TRUE	Empty	CON_Q3TTY5 K22E_MOUSE Keratin, type II cytoskeletal 2 epidermal OS=Mus musculus GN=Krt2 PE=1 SV=1	CON_Q3TTY5 K22E_MOUSE Keratin, type II cytoskeletal 2 epidermal OS=Mus musculus GN=Krt2 PE=1 SV=1		71 kDa	TRUE	unknown	0	10	0	0
105.9	TRUE	Empty	CON_Q6IFZ6 K2C1B_MOUSE Keratin, type II cytoskeletal 1b OS=Mus musculus GN=Krt77 PE=1 SV=1	CON_Q6IFZ6 K2C1B_MOUSE Keratin, type II cytoskeletal 1b OS=Mus musculus GN=Krt77 PE=1 SV=1		61 kDa	TRUE	unknown	0	10	0	0
105.1	TRUE	Empty	Keratin, type II cytoskeletal 5 OS=Homo sapiens GN=KRT5 PE=1 SV=3	P13647	KRT5	62 kDa	TRUE	unknown	0	5	0	0
105.11	TRUE	Empty	Keratin, type II cuticular Hb4 OS=Homo sapiens GN=KRT84 PE=2 SV=2	Q9NSB2 (+1)	KRT84	65 kDa	TRUE	unknown	0	2	0	0
105.12	TRUE	Empty	Keratin, type II cytoskeletal 73 OS=Homo sapiens GN=KRT73 PE=1 SV=1	Q86Y46 (+2)	KRT73	59 kDa	TRUE	unknown	0	0	0	0
105.13	TRUE	Empty	CON_Q6IME9 K2C72_MOUSE Keratin, type II cytoskeletal 72 OS=Mus musculus GN=Krt72 PE=2 SV=1	CON_Q6IME9 K2C72_MOUSE Keratin, type II cytoskeletal 72 OS=Mus musculus GN=Krt72 PE=2 SV=1		57 kDa	TRUE	unknown	0	2	0	0
105.14	TRUE	Empty	CON_O95678 K2C75_HUMAN Keratin, type II cytoskeletal 75 OS=Homo sapiens GN=KRT75 PE=1 SV=2	CON_O95678 K2C75_HUMAN Keratin, type II cytoskeletal 75 OS=Homo sapiens GN=KRT75 PE=1 SV=2 (+1)		60 kDa	TRUE	unknown	0	3	0	0
105.15	TRUE	Empty	CON_P05787-2 K2C8_HUMAN Isoform 2 of Keratin, type II cytoskeletal 8 OS=Homo sapiens GN=KRT8	CON_P05787-2 K2C8_HUMAN Isoform 2 of Keratin, type II cytoskeletal 8 OS=Homo sapiens GN=KRT8		57 kDa	TRUE	unknown	0	0	0	0
105.16	TRUE	Empty	Keratin, type II cytoskeletal 7 OS=Homo sapiens GN=KRT7 PE=1 SV=5	P08729 (+1)	KRT7	51 kDa	TRUE	unknown	0	0	0	0
105.17	TRUE	Empty	CON_Q8VED5 K2C79_MOUSE Keratin, type II cytoskeletal 79 OS=Mus musculus GN=Krt79 PE=1 SV=2	CON_Q8VED5 K2C79_MOUSE Keratin, type II cytoskeletal 79 OS=Mus musculus GN=Krt79 PE=1 SV=2		58 kDa	TRUE	unknown	0	0	0	0
106	TRUE	Empty	Elongation factor 1-gamma OS=Homo sapiens GN=EEF1G PE=1 SV=3	P26641	EEF1G	50 kDa		unknown	112	9	402	22
107	TRUE	Empty	60S ribosomal protein L8 OS=Homo sapiens GN=RPL8 PE=1 SV=2	P62917	RPL8	28 kDa		unknown	32	65	94	347
108	TRUE	Empty	Filamin-A OS=Homo sapiens GN=FLNA PE=1 SV=4	P21333	FLNA	281 kDa	TRUE	unknown	116	0	430	0
109	TRUE	Empty	60 kDa heat shock protein, mitochondrial OS=Homo sapiens GN=HSPD1 PE=1 SV=2	P10809	HSPD1	61 kDa		unknown	83	2	426	7
110	TRUE	Empty	CTP synthase 1 OS=Homo sapiens GN=CTPS1 PE=1 SV=2	P17812	CTPS1	67 kDa	TRUE	unknown	84	0	443	0
111	TRUE	Empty	Heat shock 70 kDa protein 4 OS=Homo sapiens GN=HSPA4 PE=1 SV=4	P34932	HSPA4	94 kDa	TRUE	unknown	93	0	426	0
112	TRUE	Empty	60S ribosomal protein L31 OS=Homo sapiens GN=RPL31 PE=1 SV=1	P62899	RPL31	14 kDa		unknown	20	57	65	366
113	TRUE	Empty	60S ribosomal protein L36 OS=Homo sapiens GN=RPL36 PE=1 SV=3	Q9Y3U8	RPL36	12 kDa		unknown	13	70	46	368
114	TRUE	Empty	Nucleoside diphosphate kinase A OS=Homo sapiens GN=NME1 PE=1 SV=1	P15531	NME1	17 kDa	TRUE	unknown	121	0	379	0
115	TRUE	Empty	Staphylococcal nuclease domain-containing protein 1 OS=Homo sapiens GN=SND1 PE=1 SV=1	Q7KZF4	SND1	102 kDa		unknown	13	70	55	354
116	TRUE	Empty	Cluster of La-related protein 1 OS=Homo sapiens GN=LARP1 PE=1 SV=2 (Q6PKG0)	Q6PKG0 [2]	LARP1	124 kDa	TRUE	unknown	7	70	20	398
116.1	TRUE	Empty	La-related protein 1 OS=Homo sapiens GN=LARP1 PE=1 SV=2	Q6PKG0	LARP1	124 kDa	TRUE	unknown	5	70	20	398
116.2	TRUE	Empty	La-related protein 1B OS=Homo sapiens GN=LARP1B PE=1 SV=2	Q659C4	LARP1B	105 kDa	TRUE	unknown	2	0	0	0
117	TRUE	Empty	Transcription intermediary factor 1-beta OS=Homo sapiens GN=TRIM28 PE=1 SV=5	Q13263	TRIM28	89 kDa		unknown	69	12	359	44
118	TRUE	Empty	60S ribosomal protein L23a OS=Homo sapiens GN=RPL23A PE=1 SV=1	P62750	RPL23A	18 kDa		unknown	38	36	124	283
119	TRUE	Empty	40S ribosomal protein S15a OS=Homo sapiens GN=RPS15A PE=1 SV=2	P62244	RPS15A	15 kDa		unknown	21	142	35	283
120	TRUE	Empty	Elongation factor 1-beta OS=Homo sapiens GN=EEF1B2 PE=1 SV=3	P24534	EEF1B2	25 kDa	TRUE	unknown	78	0	390	3
121	TRUE	Empty	Nucleophosmin OS=Homo sapiens GN=NPM1 PE=1 SV=2	P06748	NPM1	33 kDa		unknown	25	54	148	233
122	TRUE	Empty	Cluster of Interleukin enhancer-binding factor 3 OS=Homo sapiens GN=ILF3 PE=1 SV=3 (Q12906)	Q12906 [4]	ILF3	95 kDa	TRUE	unknown	17	54	98	293
122.1	TRUE	Empty	Interleukin enhancer-binding factor 3 OS=Homo sapiens GN=ILF3 PE=1 SV=3	Q12906	ILF3	95 kDa	TRUE	unknown	17	54	95	268
122.2	TRUE	Empty	Isoform 4 of Interleukin enhancer-binding factor 3 OS=Homo sapiens GN=ILF3	Q12906-4 (+2)	ILF3	76 kDa	TRUE	unknown	0	0	95	274
123	TRUE	Empty	Pre-mRNA-processing-splicing factor 8 OS=Homo sapiens GN=PRPF8 PE=1 SV=2	Q6P2Q9	PRPF8	274 kDa		unknown	4	93	12	350
124	TRUE	Empty	Cluster of Ubiquitin-40S ribosomal protein S27a OS=Homo sapiens GN=RPS27A PE=1 SV=2 (P62979)	P62979 [2]	RPS27A	18 kDa	TRUE	unknown	4	57	20	367
124.1	TRUE	Empty	Ubiquitin-40S ribosomal protein S27a OS=Homo sapiens GN=RPS27A PE=1 SV=2	P62979	RPS27A	18 kDa	TRUE	unknown	4	53	20	333
124.2	TRUE	Empty	Ubiquitin-60S ribosomal protein L40 OS=Homo sapiens GN=UBA52 PE=1 SV=2	P62987	UBA52	15 kDa	TRUE	unknown	4	12	20	97
125	TRUE	Empty	RuvB-like 2 OS=Homo sapiens GN=RUVBL2 PE=1 SV=3	Q9Y230	RUVBL2	51 kDa		unknown	40	36	185	189
126	TRUE	Empty	40S ribosomal protein S26 OS=Homo sapiens GN=RPS26 PE=1 SV=3	P62854	RPS26	13 kDa		unknown	9	73	44	314
127	TRUE	Empty	Cluster of Clathrin heavy chain 1 OS=Homo sapiens GN=CLTC PE=1 SV=5 (Q00610)	Q00610 [2]	CLTC	192 kDa	TRUE	unknown	76	4	370	3
127.1	TRUE	Empty	Clathrin heavy chain 1 OS=Homo sapiens GN=CLTC PE=1 SV=5	Q00610	CLTC	192 kDa	TRUE	unknown	75	4	370	3
127.2	TRUE	Empty	Clathrin heavy chain 2 OS=Homo sapiens GN=CLTCL1 PE=1 SV=2	P53675	CLTCL1	187 kDa	TRUE	unknown	7	0	0	0
128	TRUE	Empty	60S ribosomal protein L22 OS=Homo sapiens GN=RPL22 PE=1 SV=2	P35268	RPL22	15 kDa		unknown	42	40	143	219
129	TRUE	Empty	Leucine--tRNA ligase, cytoplasmic OS=Homo sapiens GN=LARS PE=1 SV=2	Q9P2J5	LARS	134 kDa		unknown	32	79	81	252
130	TRUE	Empty	40S ribosomal protein S7 OS=Homo sapiens GN=RPS7 PE=1 SV=1	P62081	RPS7	22 kDa		unknown	40	69	100	232
131	TRUE	Empty	Methionine--tRNA ligase, cytoplasmic OS=Homo sapiens GN=MARS PE=1 SV=2	P56192	MARS	101 kDa		unknown	14	45	48	329
132	TRUE	Empty	Ubiquitin-like modifier-activating enzyme 1 OS=Homo sapiens GN=UBA1 PE=1 SV=3	P22314	UBA1	118 kDa		unknown	99	0	338	0
133	TRUE	Empty	Mini-chromosome maintenance complex-binding protein OS=Homo sapiens GN=MCMBP PE=1 SV=2	Q9BTE3	MCMBP	73 kDa		unknown	94	0	331	0
134	TRUE	Empty	Glutamine--tRNA ligase OS=Homo sapiens GN=QARS PE=1 SV=1	P47897	QARS	88 kDa	TRUE	unknown	12	65	33	313
135	TRUE	Empty	60S ribosomal protein L34 OS=Homo sapiens GN=RPL34 PE=1 SV=3	P49207	RPL34	13 kDa		unknown	18	58	67	277
136	TRUE	Empty	DNA replication licensing factor MCM6 OS=Homo sapiens GN=MCM6 PE=1 SV=1	Q14566	MCM6	93 kDa		unknown	71	0	347	0
137	TRUE	Empty	Cluster of Glutamate dehydrogenase 1, mitochondrial OS=Homo sapiens GN=GLUD1 PE=1 SV=2 (P00367)	P00367 [3]	GLUD1	61 kDa	TRUE	unknown	76	0	339	0
137.1	TRUE	Empty	Glutamate dehydrogenase 1, mitochondrial OS=Homo sapiens GN=GLUD1 PE=1 SV=2	P00367	GLUD1	61 kDa	TRUE	unknown	75	0	339	0
137.2	TRUE	Empty	Glutamate dehydrogenase 2, mitochondrial OS=Homo sapiens GN=GLUD2 PE=1 SV=2	P49448	GLUD2	61 kDa	TRUE	unknown	48	0	160	0
137.3	TRUE	Empty	DHE3_BOVIN Glutamate dehydrogenase 1, mitochondrial OS=Bos taurus GN=GLUD1 PE=1 SV=2	CON_P00366 DHE3_BOVINGlutamate dehydrogenase 1, mitochondrial OS=Bos taurus GN=GLUD1 PE=1 SV=2		?	TRUE	unknown	55	0	0	0
138	TRUE	Empty	Aminoacyl tRNA synthase complex-interacting multifunctional protein 1 OS=Homo sapiens GN=AIMP1 PE=1 SV=2	Q12904	AIMP1	34 kDa		unknown	20	62	48	286
139	TRUE	Empty	14-3-3 protein zeta/delta OS=Homo sapiens GN=YWHAZ PE=1 SV=1	P63104	YWHAZ	28 kDa	TRUE	unknown	82	0	312	0
140	TRUE	Empty	Keratin, type I cytoskeletal 9 OS=Homo sapiens GN=KRT9 PE=1 SV=3	P35527	KRT9	62 kDa	TRUE	unknown	3	49	8	325
141	TRUE	Empty	DNA replication licensing factor MCM4 OS=Homo sapiens GN=MCM4 PE=1 SV=5	P33991	MCM4	97 kDa		unknown	74	0	321	0
142	TRUE	Empty	Cluster of 60S ribosomal protein L26 OS=Homo sapiens GN=RPL26 PE=1 SV=1 (P61254)	P61254 [3]	RPL26	17 kDa	TRUE	unknown	53	78	62	203
142.1	TRUE	Empty	60S ribosomal protein L26 OS=Homo sapiens GN=RPL26 PE=1 SV=1	P61254	RPL26	17 kDa	TRUE	unknown	52	76	62	203
142.2	TRUE	Empty	60S ribosomal protein L26-like 1 OS=Homo sapiens GN=RPL26L1 PE=1 SV=1	Q9UNX3	RPL26L1	17 kDa	TRUE	unknown	51	73	62	193
142.3	TRUE	Empty	Ral GTPase-activating protein subunit alpha-2 OS=Homo sapiens GN=RALGAPA2 PE=1 SV=2	Q2PPJ7	RALGAPA2	211 kDa	TRUE	unknown	1	3	5	16
143	TRUE	Empty	RuvB-like 1 OS=Homo sapiens GN=RUVBL1 PE=1 SV=1	Q9Y265	RUVBL1	50 kDa		unknown	34	34	161	148
144	TRUE	Empty	Pre-rRNA-processing protein TSR1 homolog OS=Homo sapiens GN=TSR1 PE=1 SV=1	Q2NL82	TSR1	92 kDa		unknown	8	73	13	281
145	TRUE	Empty	60S ribosomal protein L35a OS=Homo sapiens GN=RPL35A PE=1 SV=2	P18077	RPL35A	13 kDa		unknown	14	103	45	211
146	TRUE	Empty	Putative nucleoside diphosphate kinase OS=Homo sapiens GN=NME2P1 PE=5 SV=1	O60361	NME2P1	16 kDa	TRUE	unknown	90	0	278	0
147	TRUE	Empty	X-ray repair cross-complementing protein 6 OS=Homo sapiens GN=XRCC6 PE=1 SV=2	P12956	XRCC6	70 kDa		unknown	77	7	245	35
148	TRUE	Empty	Cluster of A0A3B3ISC6	A0A3B3ISC6 [2]		?	TRUE	unknown	51	13	231	57
148.1	TRUE	Empty	A0A3B3ISC6	A0A3B3ISC6		?	TRUE	unknown	0	0	231	57
148.2	TRUE	Empty	Coatomer subunit alpha OS=Homo sapiens GN=COPA PE=1 SV=2	P53621	COPA	138 kDa	TRUE	unknown	51	13	0	0
149	TRUE	Empty	RRP12-like protein OS=Homo sapiens GN=RRP12 PE=1 SV=2	Q5JTH9	RRP12	144 kDa		unknown	3	61	1	275
150	TRUE	Empty	40S ribosomal protein S25 OS=Homo sapiens GN=RPS25 PE=1 SV=1	P62851	RPS25	14 kDa		unknown	41	40	85	176
151	TRUE	Empty	14-3-3 protein beta/alpha OS=Homo sapiens GN=YWHAB PE=1 SV=3	P31946	YWHAB	28 kDa	TRUE	unknown	69	0	270	0
152	TRUE	Empty	40S ribosomal protein S15 OS=Homo sapiens GN=RPS15 PE=1 SV=2	P62841 (+1)	RPS15	17 kDa	TRUE	unknown	32	42	145	117
153	TRUE	Empty	Cytoplasmic dynein 1 light intermediate chain 1 OS=Homo sapiens GN=DYNC1LI1 PE=1 SV=3	Q9Y6G9	DYNC1LI1	57 kDa		unknown	39	30	121	161
154	TRUE	Empty	Cluster of 26S protease regulatory subunit 8 OS=Homo sapiens GN=PSMC5 PE=1 SV=1 (P62195)	P62195 [2]	PSMC5	46 kDa	TRUE	unknown	40	20	178	97
154.1	TRUE	Empty	26S protease regulatory subunit 8 OS=Homo sapiens GN=PSMC5 PE=1 SV=1	P62195	PSMC5	46 kDa	TRUE	unknown	39	20	178	97
154.2	TRUE	Empty	ATPase family protein 2 homolog OS=Homo sapiens OX=9606 GN=SPATA5 PE=1 SV=3	sp|Q8NB90|AFG2H_HUMAN		?	TRUE	unknown	5	0	0	0
155	TRUE	Empty	Serine/arginine-rich splicing factor 1 OS=Homo sapiens GN=SRSF1 PE=1 SV=2	Q07955	SRSF1	28 kDa		unknown	2	83	0	240
156	TRUE	Empty	Insulin-like growth factor 2 mRNA-binding protein 1 OS=Homo sapiens GN=IGF2BP1 PE=1 SV=2	Q9NZI8	IGF2BP1	63 kDa	TRUE	unknown	29	37	122	131
157	TRUE	Empty	Proteasome subunit alpha type-5 OS=Homo sapiens GN=PSMA5 PE=1 SV=3	P28066	PSMA5	26 kDa		unknown	44	1	266	3
158	TRUE	Empty	Cluster of Kinesin-1 heavy chain OS=Homo sapiens GN=KIF5B PE=1 SV=1 (P33176)	P33176 [3]	KIF5B	110 kDa	TRUE	unknown	53	0	266	0
158.1	TRUE	Empty	Kinesin-1 heavy chain OS=Homo sapiens GN=KIF5B PE=1 SV=1	P33176	KIF5B	110 kDa	TRUE	unknown	52	0	266	0
158.2	TRUE	Empty	Kinesin heavy chain isoform 5A OS=Homo sapiens GN=KIF5A PE=1 SV=2	Q12840	KIF5A	117 kDa	TRUE	unknown	11	0	0	0
158.3	TRUE	Empty	Kinesin heavy chain isoform 5C OS=Homo sapiens GN=KIF5C PE=1 SV=1	O60282	KIF5C	109 kDa	TRUE	unknown	0	0	0	0
159	TRUE	Empty	Serine/arginine-rich splicing factor 3 OS=Homo sapiens GN=SRSF3 PE=1 SV=1	P84103	SRSF3	19 kDa	TRUE	unknown	0	56	0	257
160	TRUE	Empty	Cluster of Alpha-actinin-4 OS=Homo sapiens GN=ACTN4 PE=1 SV=2 (O43707)	O43707 [3]	ACTN4	105 kDa	TRUE	unknown	76	0	246	0
160.1	TRUE	Empty	Alpha-actinin-4 OS=Homo sapiens GN=ACTN4 PE=1 SV=2	O43707	ACTN4	105 kDa	TRUE	unknown	68	0	224	0
160.2	TRUE	Empty	Alpha-actinin-1 OS=Homo sapiens GN=ACTN1 PE=1 SV=2	P12814	ACTN1	103 kDa	TRUE	unknown	36	0	136	0
160.3	TRUE	Empty	Alpha-actinin-3 OS=Homo sapiens GN=ACTN3 PE=1 SV=2	Q08043	ACTN3	103 kDa	TRUE	unknown	3	0	0	0
161	TRUE	Empty	Double-stranded RNA-binding protein Staufen homolog 1 OS=Homo sapiens GN=STAU1 PE=1 SV=2	O95793	STAU1	63 kDa	TRUE	unknown	0	56	6	248
162	TRUE	Empty	Adenylyl cyclase-associated protein 1 OS=Homo sapiens GN=CAP1 PE=1 SV=5	Q01518	CAP1	52 kDa	TRUE	unknown	67	0	251	0
163	TRUE	Empty	Heterogeneous nuclear ribonucleoproteins A2/B1 OS=Homo sapiens GN=HNRNPA2B1 PE=1 SV=2	P22626	HNRNPA2B1	37 kDa		unknown	17	43	73	172
164	TRUE	Empty	U5 small nuclear ribonucleoprotein 200 kDa helicase OS=Homo sapiens GN=SNRNP200 PE=1 SV=2	O75643	SNRNP200	245 kDa		unknown	8	69	8	223
165	TRUE	Empty	Cluster of Histone-binding protein RBBP4 OS=Homo sapiens GN=RBBP4 PE=1 SV=3 (Q09028)	Q09028 [2]	RBBP4	48 kDa	TRUE	unknown	47	26	165	67
165.1	TRUE	Empty	Histone-binding protein RBBP4 OS=Homo sapiens GN=RBBP4 PE=1 SV=3	Q09028	RBBP4	48 kDa	TRUE	unknown	32	23	111	65
165.2	TRUE	Empty	Histone-binding protein RBBP7 OS=Homo sapiens GN=RBBP7 PE=1 SV=1	Q16576	RBBP7	48 kDa	TRUE	unknown	41	20	124	50
166	TRUE	Empty	Proteasome subunit alpha type-1 OS=Homo sapiens GN=PSMA1 PE=1 SV=1	P25786	PSMA1	30 kDa		unknown	65	1	241	3
167	TRUE	Empty	Cluster of 26S protease regulatory subunit 6A OS=Homo sapiens GN=PSMC3 PE=1 SV=3 (P17980)	P17980 [2]	PSMC3	49 kDa	TRUE	unknown	26	28	123	125
167.1	TRUE	Empty	26S protease regulatory subunit 6A OS=Homo sapiens GN=PSMC3 PE=1 SV=3	P17980	PSMC3	49 kDa	TRUE	unknown	26	28	119	119
167.2	TRUE	Empty	R4GNH3	R4GNH3		?	TRUE	unknown	0	0	122	122
168	TRUE	Empty	Nucleosome assembly protein 1-like 1 OS=Homo sapiens GN=NAP1L1 PE=1 SV=1	P55209	NAP1L1	45 kDa	TRUE	unknown	33	14	172	74
169	TRUE	Empty	60S ribosomal protein L11 OS=Homo sapiens GN=RPL11 PE=1 SV=2	P62913	RPL11	20 kDa		unknown	7	50	84	151
170	TRUE	Empty	Brain acid soluble protein 1 OS=Homo sapiens GN=BASP1 PE=1 SV=2	P80723	BASP1	23 kDa		unknown	50	0	242	1
171	TRUE	Empty	26S proteasome non-ATPase regulatory subunit 2 OS=Homo sapiens GN=PSMD2 PE=1 SV=3	Q13200	PSMD2	100 kDa		unknown	55	18	145	81
172	TRUE	Empty	26S protease regulatory subunit 4 OS=Homo sapiens GN=PSMC1 PE=1 SV=1	P62191	PSMC1	49 kDa	TRUE	unknown	35	25	125	110
173	TRUE	Empty	14-3-3 protein gamma OS=Homo sapiens GN=YWHAG PE=1 SV=2	P61981	YWHAG	28 kDa	TRUE	unknown	77	0	216	0
174	TRUE	Empty	26S protease regulatory subunit 7 OS=Homo sapiens GN=PSMC2 PE=1 SV=3	P35998	PSMC2	49 kDa		unknown	29	23	136	100
175	TRUE	Empty	E3 ubiquitin-protein ligase MYCBP2 OS=Homo sapiens GN=MYCBP2 PE=1 SV=3	O75592	MYCBP2	510 kDa		unknown	1	65	0	214
176	TRUE	Empty	Bystin OS=Homo sapiens GN=BYSL PE=1 SV=3	Q13895	BYSL	50 kDa		unknown	2	40	0	227
177	TRUE	Empty	Proteasome subunit alpha type-6 OS=Homo sapiens GN=PSMA6 PE=1 SV=1	P60900	PSMA6	27 kDa		unknown	50	1	212	4
178	TRUE	Empty	Cell growth-regulating nucleolar protein OS=Homo sapiens GN=LYAR PE=1 SV=2	Q9NX58	LYAR	44 kDa		unknown	0	39	0	220
179	TRUE	Empty	Cluster of Septin-7 OS=Homo sapiens GN=SEPT7 PE=1 SV=2 (Q16181)	Q16181 [2]	2007-09-01	51 kDa	TRUE	unknown	51	0	210	0
179.1	TRUE	Empty	Septin-7 OS=Homo sapiens GN=SEPT7 PE=1 SV=2	Q16181	2007-09-01	51 kDa	TRUE	unknown	51	0	210	0
179.2	TRUE	Empty	Septin-14 OS=Homo sapiens GN=SEPT14 PE=1 SV=2	Q6ZU15	2014-09-01	50 kDa	TRUE	unknown	0	0	0	0
180	TRUE	Empty	Splicing factor 3B subunit 1 OS=Homo sapiens GN=SF3B1 PE=1 SV=3	O75533	SF3B1	146 kDa		unknown	30	26	102	104
181	TRUE	Empty	Calnexin OS=Homo sapiens GN=CANX PE=1 SV=2	P27824	CANX	68 kDa		unknown	50	3	198	14
182	TRUE	Empty	Cluster of Myosin light polypeptide 6 OS=Homo sapiens GN=MYL6 PE=1 SV=2 (P60660)	P60660 [2]	MYL6	17 kDa	TRUE	unknown	62	3	179	12
182.1	TRUE	Empty	Myosin light polypeptide 6 OS=Homo sapiens GN=MYL6 PE=1 SV=2	P60660	MYL6	17 kDa	TRUE	unknown	61	3	178	12
182.2	TRUE	Empty	Myosin light chain 6B OS=Homo sapiens GN=MYL6B PE=1 SV=1	P14649	MYL6B	23 kDa	TRUE	unknown	22	0	72	12
183	TRUE	Empty	Cluster of Septin-9 OS=Homo sapiens GN=SEPT9 PE=1 SV=2 (Q9UHD8)	Q9UHD8 [2]	2009-09-01	65 kDa	TRUE	unknown	45	0	214	0
183.1	TRUE	Empty	Septin-9 OS=Homo sapiens GN=SEPT9 PE=1 SV=2	Q9UHD8	2009-09-01	65 kDa	TRUE	unknown	45	0	213	0
183.2	TRUE	Empty	Isoform 5 of Septin-9 OS=Homo sapiens GN=SEPT9	Q9UHD8-5	2009-09-01	65 kDa	TRUE	unknown	0	0	214	0
184	TRUE	Empty	ATP-dependent RNA helicase A OS=Homo sapiens GN=DHX9 PE=1 SV=4	Q08211	DHX9	141 kDa		unknown	3	36	4	207
185	TRUE	Empty	60S ribosomal protein L19 OS=Homo sapiens GN=RPL19 PE=1 SV=1	P84098 (+2)	RPL19	23 kDa		unknown	7	40	55	145
186	TRUE	Empty	DNA replication licensing factor MCM7 OS=Homo sapiens GN=MCM7 PE=1 SV=4	P33993	MCM7	81 kDa		unknown	40	3	202	3
187	TRUE	Empty	Aminoacyl tRNA synthase complex-interacting multifunctional protein 2 OS=Homo sapiens GN=AIMP2 PE=1 SV=2	Q13155	AIMP2	35 kDa		unknown	2	57	14	177
188	TRUE	Empty	Heat shock protein 105 kDa OS=Homo sapiens GN=HSPH1 PE=1 SV=1	Q92598	HSPH1	97 kDa	TRUE	unknown	44	0	205	0
189	TRUE	Empty	Cluster of Chromodomain-helicase-DNA-binding protein 4 OS=Homo sapiens GN=CHD4 PE=1 SV=2 (Q14839)	Q14839 [2]	CHD4	218 kDa	TRUE	unknown	32	17	131	65
189.1	TRUE	Empty	Chromodomain-helicase-DNA-binding protein 4 OS=Homo sapiens GN=CHD4 PE=1 SV=2	Q14839	CHD4	218 kDa	TRUE	unknown	31	16	131	65
189.2	TRUE	Empty	Chromodomain-helicase-DNA-binding protein 5 OS=Homo sapiens GN=CHD5 PE=1 SV=1	Q8TDI0	CHD5	223 kDa	TRUE	unknown	7	2	7	0
190	TRUE	Empty	116 kDa U5 small nuclear ribonucleoprotein component OS=Homo sapiens GN=EFTUD2 PE=1 SV=1	Q15029	EFTUD2	109 kDa	TRUE	unknown	8	45	41	149
191	TRUE	Empty	DNA replication licensing factor MCM2 OS=Homo sapiens GN=MCM2 PE=1 SV=4	P49736	MCM2	102 kDa		unknown	42	0	195	0
192	TRUE	Empty	Protein arginine N-methyltransferase 5 OS=Homo sapiens GN=PRMT5 PE=1 SV=4	O14744	PRMT5	73 kDa		unknown	29	20	96	89
193	TRUE	Empty	Adenosylhomocysteinase OS=Homo sapiens GN=AHCY PE=1 SV=4	P23526	AHCY	48 kDa		unknown	43	0	187	0
194	TRUE	Empty	C-1-tetrahydrofolate synthase, cytoplasmic OS=Homo sapiens GN=MTHFD1 PE=1 SV=3	P11586	MTHFD1	102 kDa	TRUE	unknown	45	0	184	0
195	TRUE	Empty	14-3-3 protein eta OS=Homo sapiens GN=YWHAH PE=1 SV=4	Q04917	YWHAH	28 kDa	TRUE	unknown	55	0	172	0
196	TRUE	Empty	Creatine kinase B-type OS=Homo sapiens GN=CKB PE=1 SV=1	P12277	CKB	43 kDa		unknown	39	0	181	1
197	TRUE	Empty	Multifunctional protein ADE2 OS=Homo sapiens GN=PAICS PE=1 SV=3	P22234	PAICS	47 kDa		unknown	38	1	176	3
198	TRUE	Empty	Protein LTV1 homolog OS=Homo sapiens GN=LTV1 PE=1 SV=1	Q96GA3	LTV1	55 kDa		unknown	1	33	6	180
199	TRUE	Empty	Myosin regulatory light chain 12B OS=Homo sapiens GN=MYL12B PE=1 SV=2	O14950	MYL12B	20 kDa		unknown	38	0	177	1
200	TRUE	Empty	Cluster of Hsc70-interacting protein OS=Homo sapiens GN=ST13 PE=1 SV=2 (P50502)	P50502 [2]	ST13	41 kDa	TRUE	unknown	50	0	176	0
200.1	TRUE	Empty	Hsc70-interacting protein OS=Homo sapiens GN=ST13 PE=1 SV=2	P50502	ST13	41 kDa	TRUE	unknown	49	0	176	0
200.2	TRUE	Empty	Putative protein FAM10A4 OS=Homo sapiens GN=ST13P4 PE=5 SV=1	Q8IZP2	ST13P4	27 kDa	TRUE	unknown	29	0	95	0
201	TRUE	Empty	Protein disulfide-isomerase OS=Homo sapiens GN=P4HB PE=1 SV=3	P07237	P4HB	57 kDa		unknown	68	0	153	3
202	TRUE	Empty	Neuroblast differentiation-associated protein AHNAK OS=Homo sapiens GN=AHNAK PE=1 SV=2	Q09666	AHNAK	629 kDa		unknown	51	5	183	0
203	TRUE	Empty	Cluster of Spectrin alpha chain, non-erythrocytic 1 OS=Homo sapiens GN=SPTAN1 PE=1 SV=3 (Q13813)	Q13813 [4]	SPTAN1	285 kDa	TRUE	unknown	49	0	176	1
203.1	TRUE	Empty	Spectrin alpha chain, non-erythrocytic 1 OS=Homo sapiens GN=SPTAN1 PE=1 SV=3	Q13813	SPTAN1	285 kDa	TRUE	unknown	49	0	172	1
203.2	TRUE	Empty	Isoform 2 of Spectrin alpha chain, non-erythrocytic 1 OS=Homo sapiens GN=SPTAN1	Q13813-2 (+2)	SPTAN1	285 kDa	TRUE	unknown	0	0	161	1
204	TRUE	Empty	L-lactate dehydrogenase A chain OS=Homo sapiens GN=LDHA PE=1 SV=2	P00338	LDHA	37 kDa	TRUE	unknown	42	0	176	0
205	TRUE	Empty	26S proteasome non-ATPase regulatory subunit 1 OS=Homo sapiens GN=PSMD1 PE=1 SV=2	Q99460	PSMD1	106 kDa		unknown	22	23	83	87
206	TRUE	Empty	Cluster of Cytoplasmic dynein 1 intermediate chain 2 OS=Homo sapiens GN=DYNC1I2 PE=1 SV=3 (Q13409)	Q13409 [3]	DYNC1I2	71 kDa	TRUE	unknown	15	19	101	80
206.1	TRUE	Empty	Cytoplasmic dynein 1 intermediate chain 2 OS=Homo sapiens GN=DYNC1I2 PE=1 SV=3	Q13409	DYNC1I2	71 kDa	TRUE	unknown	15	19	93	71
206.2	TRUE	Empty	Isoform 2C of Cytoplasmic dynein 1 intermediate chain 2 OS=Homo sapiens GN=DYNC1I2	Q13409-3 (+1)	DYNC1I2	68 kDa	TRUE	unknown	0	0	101	80
207	TRUE	Empty	Peroxiredoxin-2 OS=Homo sapiens GN=PRDX2 PE=1 SV=5	P32119	PRDX2	22 kDa	TRUE	unknown	45	0	168	0
208	TRUE	Empty	Splicing factor 3B subunit 2 OS=Homo sapiens GN=SF3B2 PE=1 SV=2	Q13435	SF3B2	100 kDa		unknown	25	23	86	84
209	TRUE	Empty	Cluster of Peptidyl-prolyl cis-trans isomerase A OS=Homo sapiens GN=PPIA PE=1 SV=2 (P62937)	P62937 [5]	PPIA	18 kDa	TRUE	unknown	54	0	160	0
209.1	TRUE	Empty	Peptidyl-prolyl cis-trans isomerase A OS=Homo sapiens GN=PPIA PE=1 SV=2	P62937 (+1)	PPIA	18 kDa	TRUE	unknown	53	0	160	0
209.2	TRUE	Empty	Peptidyl-prolyl cis-trans isomerase A-like 4E OS=Homo sapiens GN=PPIAL4E PE=3 SV=1	A0A075B759 (+2)	PPIAL4E	18 kDa	TRUE	unknown	17	0	60	0
210	TRUE	Empty	DNA replication licensing factor MCM3 OS=Homo sapiens GN=MCM3 PE=1 SV=3	P25205	MCM3	91 kDa		unknown	40	0	178	0
211	TRUE	Empty	Cluster of Spectrin beta chain, non-erythrocytic 1 OS=Homo sapiens GN=SPTBN1 PE=1 SV=2 (Q01082)	Q01082 [2]	SPTBN1	275 kDa	TRUE	unknown	48	1	162	0
211.1	TRUE	Empty	Spectrin beta chain, non-erythrocytic 1 OS=Homo sapiens GN=SPTBN1 PE=1 SV=2	Q01082	SPTBN1	275 kDa	TRUE	unknown	48	1	160	0
211.2	TRUE	Empty	Isoform 2 of Spectrin beta chain, non-erythrocytic 1 OS=Homo sapiens GN=SPTBN1	Q01082-3	SPTBN1	251 kDa	TRUE	unknown	0	0	134	0
212	TRUE	Empty	14-3-3 protein theta OS=Homo sapiens GN=YWHAQ PE=1 SV=1	P27348	YWHAQ	28 kDa	TRUE	unknown	53	0	155	0
213	TRUE	Empty	Serine/arginine-rich splicing factor 7 OS=Homo sapiens GN=SRSF7 PE=1 SV=1	Q16629	SRSF7	27 kDa	TRUE	unknown	0	42	0	166
214	TRUE	Empty	Glucose-6-phosphate isomerase OS=Homo sapiens GN=GPI PE=1 SV=4	P06744	GPI	63 kDa		unknown	43	0	156	0
215	TRUE	Empty	Cluster of Histone H1.2 OS=Homo sapiens GN=HIST1H1C PE=1 SV=2 (P16403)	P16403 [3]	HIST1H1C	21 kDa	TRUE	unknown	2	37	7	150
215.1	TRUE	Empty	Histone H1.2 OS=Homo sapiens GN=HIST1H1C PE=1 SV=2	P16403	HIST1H1C	21 kDa	TRUE	unknown	2	25	7	130
215.2	TRUE	Empty	Histone H1.3 OS=Homo sapiens GN=HIST1H1D PE=1 SV=2	P16402	HIST1H1D	22 kDa	TRUE	unknown	0	24	3	125
215.3	TRUE	Empty	Histone H1.4 OS=Homo sapiens GN=HIST1H1E PE=1 SV=2	P10412	HIST1H1E	22 kDa	TRUE	unknown	1	26	3	113
216	TRUE	Empty	Eukaryotic translation elongation factor 1 epsilon-1 OS=Homo sapiens GN=EEF1E1 PE=1 SV=1	O43324	EEF1E1	20 kDa		unknown	3	48	13	132
217	TRUE	Empty	Cluster of DNA topoisomerase 1 OS=Homo sapiens GN=TOP1 PE=1 SV=2 (P11387)	P11387 [2]	TOP1	91 kDa	TRUE	unknown	4	31	0	160
217.1	TRUE	Empty	DNA topoisomerase 1 OS=Homo sapiens GN=TOP1 PE=1 SV=2	P11387	TOP1	91 kDa	TRUE	unknown	3	31	0	160
217.2	TRUE	Empty	DNA topoisomerase I, mitochondrial OS=Homo sapiens GN=TOP1MT PE=1 SV=1	Q969P6	TOP1MT	70 kDa	TRUE	unknown	1	0	0	0
218	TRUE	Empty	ATP synthase subunit d, mitochondrial OS=Homo sapiens GN=ATP5H PE=1 SV=3	O75947	ATP5H	18 kDa		unknown	8	23	32	132
219	TRUE	Empty	Valine--tRNA ligase OS=Homo sapiens GN=VARS PE=1 SV=4	P26640	VARS	140 kDa		unknown	32	0	161	0
220	TRUE	Empty	39S ribosomal protein L12, mitochondrial OS=Homo sapiens GN=MRPL12 PE=1 SV=2	P52815	MRPL12	21 kDa		unknown	6	38	43	105
221	TRUE	Empty	ATP synthase subunit O, mitochondrial OS=Homo sapiens GN=ATP5O PE=1 SV=1	P48047	ATP5O	23 kDa		unknown	10	22	30	126
222	TRUE	Empty	Probable rRNA-processing protein EBP2 OS=Homo sapiens GN=EBNA1BP2 PE=1 SV=2	Q99848	EBNA1BP2	35 kDa		unknown	0	26	0	157
223	TRUE	Empty	26S proteasome non-ATPase regulatory subunit 11 OS=Homo sapiens GN=PSMD11 PE=1 SV=3	O00231	PSMD11	47 kDa		unknown	29	4	149	8
224	TRUE	Empty	Nucleosome assembly protein 1-like 4 OS=Homo sapiens GN=NAP1L4 PE=1 SV=1	Q99733	NAP1L4	43 kDa	TRUE	unknown	42	2	133	9
225	TRUE	Empty	X-ray repair cross-complementing protein 5 OS=Homo sapiens GN=XRCC5 PE=1 SV=3	P13010	XRCC5	83 kDa		unknown	30	6	131	15
226	TRUE	Empty	Transketolase OS=Homo sapiens GN=TKT PE=1 SV=3	P29401	TKT	68 kDa		unknown	41	0	141	0
227	TRUE	Empty	Protein TFG OS=Homo sapiens GN=TFG PE=1 SV=2	Q92734	TFG	43 kDa		unknown	36	0	146	0
228	TRUE	Empty	RNA-binding protein PNO1 OS=Homo sapiens GN=PNO1 PE=1 SV=1	Q9NRX1	PNO1	28 kDa		unknown	0	29	0	149
229	TRUE	Empty	Proteasome subunit alpha type-7 OS=Homo sapiens GN=PSMA7 PE=1 SV=1	O14818	PSMA7	28 kDa		unknown	31	2	152	2
230	TRUE	Empty	Dihydrolipoyllysine-residue acetyltransferase component of pyruvate dehydrogenase complex, mitochondrial OS=Homo sapiens GN=DLAT PE=1 SV=3	P10515	DLAT	69 kDa		unknown	0	28	1	160
231	TRUE	Empty	Ribosome biogenesis protein BRX1 homolog OS=Homo sapiens GN=BRIX1 PE=1 SV=2	Q8TDN6	BRIX1	41 kDa		unknown	0	39	0	142
232	TRUE	Empty	Lupus La protein OS=Homo sapiens GN=SSB PE=1 SV=2	P05455	SSB	47 kDa		unknown	32	8	124	19
233	TRUE	Empty	Myristoylated alanine-rich C-kinase substrate OS=Homo sapiens GN=MARCKS PE=1 SV=4	P29966	MARCKS	32 kDa		unknown	34	2	146	0
234	TRUE	Empty	Prohibitin OS=Homo sapiens GN=PHB PE=1 SV=1	P35232	PHB	30 kDa		unknown	14	17	44	102
235	TRUE	Empty	26S proteasome non-ATPase regulatory subunit 3 OS=Homo sapiens GN=PSMD3 PE=1 SV=2	O43242	PSMD3	61 kDa		unknown	28	8	124	23
236	TRUE	Empty	Cluster of Septin-11 OS=Homo sapiens GN=SEPT11 PE=1 SV=3 (Q9NVA2)	Q9NVA2 [9]	2011-09-01	49 kDa	TRUE	unknown	33	0	149	0
236.1	TRUE	Empty	Septin-11 OS=Homo sapiens GN=SEPT11 PE=1 SV=3	Q9NVA2	2011-09-01	49 kDa	TRUE	unknown	28	0	137	0
236.2	TRUE	Empty	Septin-6 OS=Homo sapiens GN=SEPT6 PE=1 SV=4	Q14141	2006-09-01	50 kDa	TRUE	unknown	12	0	26	0
236.3	TRUE	Empty	Septin-8 OS=Homo sapiens GN=SEPT8 PE=1 SV=4	Q92599 (+6)	2008-09-01	56 kDa	TRUE	unknown	8	0	16	0
237	TRUE	Empty	CTP synthase 2 OS=Homo sapiens GN=CTPS2 PE=1 SV=1	Q9NRF8	CTPS2	66 kDa	TRUE	unknown	32	0	148	0
238	TRUE	Empty	Proteasome subunit alpha type-2 OS=Homo sapiens GN=PSMA2 PE=1 SV=2	P25787	PSMA2	26 kDa		unknown	26	1	144	1
239	TRUE	Empty	Cluster of 60S ribosomal protein L36a-like OS=Homo sapiens GN=RPL36AL PE=1 SV=3 (Q969Q0)	Q969Q0 [2]	RPL36AL	12 kDa	TRUE	unknown	10	24	25	111
239.1	TRUE	Empty	60S ribosomal protein L36a-like OS=Homo sapiens GN=RPL36AL PE=1 SV=3	Q969Q0	RPL36AL	12 kDa	TRUE	unknown	8	21	25	111
239.2	TRUE	Empty	60S ribosomal protein L36a OS=Homo sapiens GN=RPL36A PE=1 SV=2	P83881	RPL36A	12 kDa	TRUE	unknown	9	22	0	0
240	TRUE	Empty	Cluster of Glucosidase 2 subunit beta OS=Homo sapiens GN=PRKCSH PE=1 SV=2 (P14314)	P14314 [2]	PRKCSH	59 kDa	TRUE	unknown	32	0	141	0
240.1	TRUE	Empty	Glucosidase 2 subunit beta OS=Homo sapiens GN=PRKCSH PE=1 SV=2	P14314	PRKCSH	59 kDa	TRUE	unknown	32	0	136	0
240.2	TRUE	Empty	K7ELL7	K7ELL7		?	TRUE	unknown	0	0	141	0
241	TRUE	Empty	Pyruvate dehydrogenase E1 component subunit beta, mitochondrial OS=Homo sapiens GN=PDHB PE=1 SV=3	P11177	PDHB	39 kDa		unknown	6	28	26	114
242	TRUE	Empty	Protein polybromo-1 OS=Homo sapiens GN=PBRM1 PE=1 SV=1	Q86U86	PBRM1	193 kDa		unknown	0	24	0	150
243	TRUE	Empty	Structural maintenance of chromosomes protein 4 OS=Homo sapiens GN=SMC4 PE=1 SV=2	Q9NTJ3	SMC4	147 kDa		unknown	32	0	135	5
244	TRUE	Empty	Pre-mRNA-processing factor 19 OS=Homo sapiens GN=PRPF19 PE=1 SV=1	Q9UMS4	PRPF19	55 kDa		unknown	8	27	31	106
245	TRUE	Empty	Eukaryotic translation initiation factor 3 subunit C-like protein OS=Homo sapiens GN=EIF3CL PE=3 SV=1	B5ME19 (+1)	EIF3CL	105 kDa		unknown	15	24	75	53
246	TRUE	Empty	Serine hydroxymethyltransferase, mitochondrial OS=Homo sapiens GN=SHMT2 PE=1 SV=3	P34897	SHMT2	56 kDa	TRUE	unknown	37	0	129	0
247	TRUE	Empty	Cluster of Isoform 3 of Dynactin subunit 1 OS=Homo sapiens GN=DCTN1 (Q14203-3)	Q14203-3 [3]	DCTN1	137 kDa	TRUE	unknown	25	16	83	50
247.1	TRUE	Empty	Isoform 3 of Dynactin subunit 1 OS=Homo sapiens GN=DCTN1	Q14203-3 (+1)	DCTN1	137 kDa	TRUE	unknown	0	0	83	50
247.2	TRUE	Empty	Dynactin subunit 1 OS=Homo sapiens GN=DCTN1 PE=1 SV=3	Q14203	DCTN1	142 kDa	TRUE	unknown	25	16	0	0
248	TRUE	Empty	D-3-phosphoglycerate dehydrogenase OS=Homo sapiens GN=PHGDH PE=1 SV=4	O43175	PHGDH	57 kDa		unknown	31	4	131	1
249	TRUE	Empty	Poly [ADP-ribose] polymerase 1 OS=Homo sapiens GN=PARP1 PE=1 SV=4	P09874	PARP1	113 kDa		unknown	25	19	89	39
250	TRUE	Empty	tRNA-splicing ligase RtcB homolog OS=Homo sapiens GN=RTCB PE=1 SV=1	Q9Y3I0	RTCB	55 kDa		unknown	32	3	112	18
251	TRUE	Empty	Cluster of RNA-binding protein 4 OS=Homo sapiens GN=RBM4 PE=1 SV=1 (Q9BWF3)	Q9BWF3 [2]	RBM4	40 kDa	TRUE	unknown	1	18	2	141
251.1	TRUE	Empty	RNA-binding protein 4 OS=Homo sapiens GN=RBM4 PE=1 SV=1	Q9BWF3	RBM4	40 kDa	TRUE	unknown	0	18	2	139
251.2	TRUE	Empty	RNA-binding protein 4B OS=Homo sapiens GN=RBM4B PE=1 SV=1	Q9BQ04	RBM4B	40 kDa	TRUE	unknown	0	12	0	67
252	TRUE	Empty	Bifunctional purine biosynthesis protein PURH OS=Homo sapiens GN=ATIC PE=1 SV=3	P31939	ATIC	65 kDa		unknown	45	0	123	0
253	TRUE	Empty	Eukaryotic translation initiation factor 4 gamma 1 OS=Homo sapiens GN=EIF4G1 PE=1 SV=4	Q04637	EIF4G1	175 kDa	TRUE	unknown	31	5	128	7
254	TRUE	Empty	Nucleolar GTP-binding protein 1 OS=Homo sapiens GN=GTPBP4 PE=1 SV=3	Q9BZE4	GTPBP4	74 kDa		unknown	0	31	0	132
255	TRUE	Empty	Cluster of Cullin-associated NEDD8-dissociated protein 1 OS=Homo sapiens GN=CAND1 PE=1 SV=2 (Q86VP6)	Q86VP6 [2]	CAND1	136 kDa	TRUE	unknown	32	0	127	0
255.1	TRUE	Empty	Cullin-associated NEDD8-dissociated protein 1 OS=Homo sapiens GN=CAND1 PE=1 SV=2	Q86VP6	CAND1	136 kDa	TRUE	unknown	32	0	127	0
255.2	TRUE	Empty	Cullin-associated NEDD8-dissociated protein 2 OS=Homo sapiens GN=CAND2 PE=1 SV=3	O75155	CAND2	135 kDa	TRUE	unknown	0	0	0	0
256	TRUE	Empty	Pre-mRNA-processing factor 6 OS=Homo sapiens GN=PRPF6 PE=1 SV=1	O94906	PRPF6	107 kDa		unknown	1	38	0	120
257	TRUE	Empty	Cluster of Histone H2B type 1-N OS=Homo sapiens GN=HIST1H2BN PE=1 SV=3 (Q99877)	Q99877 [2]	HIST1H2BN	14 kDa	TRUE	unknown	6	36	31	83
257.1	TRUE	Empty	Histone H2B type 1-N OS=Homo sapiens GN=HIST1H2BN PE=1 SV=3	Q99877	HIST1H2BN	14 kDa	TRUE	unknown	6	36	31	83
257.2	TRUE	Empty	Histone H2B type 1-L OS=Homo sapiens GN=HIST1H2BL PE=1 SV=3	Q99880	HIST1H2BL	14 kDa	TRUE	unknown	6	36	31	83
258	TRUE	Empty	Cluster of 26S proteasome non-ATPase regulatory subunit 4 OS=Homo sapiens GN=PSMD4 PE=1 SV=1 (P55036)	P55036 [2]	PSMD4	41 kDa	TRUE	unknown	19	2	121	15
258.1	TRUE	Empty	26S proteasome non-ATPase regulatory subunit 4 OS=Homo sapiens GN=PSMD4 PE=1 SV=1	P55036	PSMD4	41 kDa	TRUE	unknown	17	2	121	15
258.2	TRUE	Empty	Putative PIP5K1A and PSMD4-like protein OS=Homo sapiens GN=PIPSL PE=5 SV=1	A2A3N6	PIPSL	95 kDa	TRUE	unknown	5	0	0	0
259	TRUE	Empty	Heterogeneous nuclear ribonucleoprotein Q OS=Homo sapiens GN=SYNCRIP PE=1 SV=2	O60506	SYNCRIP	70 kDa	TRUE	unknown	15	28	30	85
260	TRUE	Empty	Eukaryotic translation initiation factor 3 subunit I OS=Homo sapiens GN=EIF3I PE=1 SV=1	Q13347	EIF3I	37 kDa		unknown	19	7	77	47
261	TRUE	Empty	Cluster of Keratin, type I cytoskeletal 10 OS=Homo sapiens GN=KRT10 PE=1 SV=6 (P13645)	P13645 [27]	KRT10	59 kDa	TRUE	unknown	4	30	0	118
261.1	TRUE	Empty	Keratin, type I cytoskeletal 10 OS=Homo sapiens GN=KRT10 PE=1 SV=6	P13645	KRT10	59 kDa	TRUE	unknown	2	24	0	111
261.2	TRUE	Empty	Keratin, type I cytoskeletal 14 OS=Homo sapiens GN=KRT14 PE=1 SV=4	P02533	KRT14	52 kDa	TRUE	unknown	0	11	0	20
261.3	TRUE	Empty	Keratin, type I cytoskeletal 27 OS=Homo sapiens GN=KRT27 PE=1 SV=2	Q7Z3Y8	KRT27	50 kDa	TRUE	unknown	0	0	0	0
261.4	TRUE	Empty	Keratin, type I cytoskeletal 19 OS=Homo sapiens GN=KRT19 PE=1 SV=4	P08727 (+1)	KRT19	44 kDa	TRUE	unknown	0	0	0	0
261.5	TRUE	Empty	Keratin, type I cytoskeletal 15 OS=Homo sapiens GN=KRT15 PE=1 SV=3	P19012 (+1)	KRT15	49 kDa	TRUE	unknown	0	0	0	0
261.6	TRUE	Empty	CON_P08779 K1C16_HUMAN Keratin, type I cytoskeletal 16 OS=Homo sapiens GN=KRT16 PE=1 SV=4	CON_P08779 K1C16_HUMAN Keratin, type I cytoskeletal 16 OS=Homo sapiens GN=KRT16 PE=1 SV=4 (+1)		51 kDa	TRUE	unknown	0	10	0	0
261.7	TRUE	Empty	CON_P02535 K1C10_MOUSE Keratin, type I cytoskeletal 10 OS=Mus musculus GN=Krt10 PE=1 SV=3	CON_P02535 K1C10_MOUSE Keratin, type I cytoskeletal 10 OS=Mus musculus GN=Krt10 PE=1 SV=3 (+2)		58 kDa	TRUE	unknown	0	0	0	0
261.8	TRUE	Empty	CON_Q9QWL7 K1C17_MOUSE Keratin, type I cytoskeletal 17 OS=Mus musculus GN=Krt17 PE=1 SV=3	CON_Q9QWL7 K1C17_MOUSE Keratin, type I cytoskeletal 17 OS=Mus musculus GN=Krt17 PE=1 SV=3		48 kDa	TRUE	unknown	1	6	0	0
261.9	TRUE	Empty	CON_Q3ZAW8 Q3ZAW8_MOUSE Keratin 16 OS=Mus musculus GN=Krt16 PE=2 SV=1	CON_Q3ZAW8 Q3ZAW8_MOUSE Keratin 16 OS=Mus musculus GN=Krt16 PE=2 SV=1 (+1)		52 kDa	TRUE	unknown	0	0	0	0
261.1	TRUE	Empty	CON_P08730 K1C13_MOUSE Keratin, type I cytoskeletal 13 OS=Mus musculus GN=Krt13 PE=1 SV=2	CON_P08730 K1C13_MOUSE Keratin, type I cytoskeletal 13 OS=Mus musculus GN=Krt13 PE=1 SV=2 (+1)		48 kDa	TRUE	unknown	0	0	0	0
261.11	TRUE	Empty	CON_P19001 K1C19_MOUSE Keratin, type I cytoskeletal 19 OS=Mus musculus GN=Krt19 PE=1 SV=1	CON_P19001 K1C19_MOUSE Keratin, type I cytoskeletal 19 OS=Mus musculus GN=Krt19 PE=1 SV=1		45 kDa	TRUE	unknown	0	5	0	0
261.12	TRUE	Empty	CON_Q148H6 K1C28_BOVIN Keratin, type I cytoskeletal 28 OS=Bos taurus GN=KRT28 PE=2 SV=1	CON_Q148H6 K1C28_BOVIN Keratin, type I cytoskeletal 28 OS=Bos taurus GN=KRT28 PE=2 SV=1		51 kDa	TRUE	unknown	0	0	0	0
261.13	TRUE	Empty	Keratin, type I cuticular Ha6 OS=Homo sapiens GN=KRT36 PE=2 SV=1	O76013 (+2)	KRT36	52 kDa	TRUE	unknown	0	0	0	0
261.14	TRUE	Empty	Keratin, type I cuticular Ha5 OS=Homo sapiens GN=KRT35 PE=2 SV=5	Q92764 (+2)	KRT35	50 kDa	TRUE	unknown	0	0	0	0
261.15	TRUE	Empty	CON_REFSEQ:XP_986630 Tax_Id=10090 Gene_Symbol=Krt33b keratin complex 1, acidic, gene 3	CON_REFSEQ:XP_986630 Tax_Id=10090 Gene_Symbol=Krt33b keratin complex 1, acidic, gene 3		54 kDa	TRUE	unknown	0	0	0	0
261.16	TRUE	Empty	CON_Q6IFX2 K1C42_MOUSE Keratin, type I cytoskeletal 42 OS=Mus musculus GN=Krt42 PE=1 SV=1	CON_Q6IFX2 K1C42_MOUSE Keratin, type I cytoskeletal 42 OS=Mus musculus GN=Krt42 PE=1 SV=1		50 kDa	TRUE	unknown	0	0	0	0
262	TRUE	Empty	Eukaryotic translation initiation factor 3 subunit A OS=Homo sapiens GN=EIF3A PE=1 SV=1	Q14152	EIF3A	167 kDa		unknown	15	25	43	71
263	TRUE	Empty	Cluster of Alpha-centractin OS=Homo sapiens GN=ACTR1A PE=1 SV=1 (P61163)	P61163 [2]	ACTR1A	43 kDa	TRUE	unknown	14	16	69	54
263.1	TRUE	Empty	Alpha-centractin OS=Homo sapiens GN=ACTR1A PE=1 SV=1	P61163	ACTR1A	43 kDa	TRUE	unknown	14	16	67	53
263.2	TRUE	Empty	Beta-centractin OS=Homo sapiens GN=ACTR1B PE=1 SV=1	P42025	ACTR1B	42 kDa	TRUE	unknown	8	8	42	28
264	TRUE	Empty	Filamin-B OS=Homo sapiens GN=FLNB PE=1 SV=2	O75369	FLNB	278 kDa	TRUE	unknown	28	0	117	0
265	TRUE	Empty	Coatomer subunit beta' OS=Homo sapiens GN=COPB2 PE=1 SV=2	P35606	COPB2	102 kDa		unknown	25	10	80	32
266	TRUE	Empty	Importin subunit beta-1 OS=Homo sapiens GN=KPNB1 PE=1 SV=2	Q14974	KPNB1	97 kDa		unknown	31	0	114	2
267	TRUE	Empty	Cluster of Serine/threonine-protein phosphatase 2A 65 kDa regulatory subunit A alpha isoform OS=Homo sapiens GN=PPP2R1A PE=1 SV=4 (P30153)	P30153 [2]	PPP2R1A	65 kDa	TRUE	unknown	31	1	116	0
267.1	TRUE	Empty	Serine/threonine-protein phosphatase 2A 65 kDa regulatory subunit A alpha isoform OS=Homo sapiens GN=PPP2R1A PE=1 SV=4	P30153	PPP2R1A	65 kDa	TRUE	unknown	30	1	116	0
267.2	TRUE	Empty	Serine/threonine-protein phosphatase 2A 65 kDa regulatory subunit A beta isoform OS=Homo sapiens GN=PPP2R1B PE=1 SV=3	P30154	PPP2R1B	66 kDa	TRUE	unknown	3	0	0	0
268	TRUE	Empty	Structural maintenance of chromosomes protein 2 OS=Homo sapiens GN=SMC2 PE=1 SV=2	O95347	SMC2	136 kDa		unknown	37	2	106	0
269	TRUE	Empty	Heat shock 70 kDa protein 4L OS=Homo sapiens GN=HSPA4L PE=1 SV=3	O95757	HSPA4L	95 kDa	TRUE	unknown	38	0	110	0
270	TRUE	Empty	Cluster of Putative ATP-dependent RNA helicase DHX30 OS=Homo sapiens GN=DHX30 PE=1 SV=1 (Q7L2E3)	Q7L2E3 [2]	DHX30	134 kDa	TRUE	unknown	0	31	0	110
270.1	TRUE	Empty	Putative ATP-dependent RNA helicase DHX30 OS=Homo sapiens GN=DHX30 PE=1 SV=1	Q7L2E3	DHX30	134 kDa	TRUE	unknown	0	31	0	105
270.2	TRUE	Empty	Isoform 2 of Putative ATP-dependent RNA helicase DHX30 OS=Homo sapiens GN=DHX30	Q7L2E3-2	DHX30	136 kDa	TRUE	unknown	0	0	0	110
271	TRUE	Empty	Heterogeneous nuclear ribonucleoprotein L OS=Homo sapiens GN=HNRNPL PE=1 SV=2	P14866	HNRNPL	64 kDa		unknown	1	21	1	119
272	TRUE	Empty	Nucleolar GTP-binding protein 2 OS=Homo sapiens GN=GNL2 PE=1 SV=1	Q13823	GNL2	84 kDa		unknown	0	36	0	106
273	TRUE	Empty	Guanine nucleotide-binding protein-like 3 OS=Homo sapiens GN=GNL3 PE=1 SV=2	Q9BVP2	GNL3	62 kDa		unknown	1	32	0	106
274	TRUE	Empty	Eukaryotic translation initiation factor 3 subunit G OS=Homo sapiens GN=EIF3G PE=1 SV=2	O75821	EIF3G	36 kDa		unknown	13	11	71	44
275	TRUE	Empty	Peroxiredoxin-4 OS=Homo sapiens GN=PRDX4 PE=1 SV=1	Q13162	PRDX4	31 kDa	TRUE	unknown	35	1	104	0
276	TRUE	Empty	Cluster of H0Y7A7	H0Y7A7 [8]		?	TRUE	unknown	27	7	95	9
276.1	TRUE	Empty	H0Y7A7	H0Y7A7 (+6)		?	TRUE	unknown	26	7	95	9
276.2	TRUE	Empty	Calmodulin-like protein 3 OS=Homo sapiens GN=CALML3 PE=1 SV=2	P27482	CALML3	17 kDa	TRUE	unknown	14	0	18	1
277	TRUE	Empty	26S protease regulatory subunit 6B OS=Homo sapiens GN=PSMC4 PE=1 SV=2	P43686	PSMC4	47 kDa	TRUE	unknown	23	8	75	34
278	TRUE	Empty	Septin-2 OS=Homo sapiens GN=SEPT2 PE=1 SV=1	Q15019 (+1)	2002-09-01	41 kDa		unknown	20	0	123	0
279	TRUE	Empty	Peptidyl-prolyl cis-trans isomerase FKBP4 OS=Homo sapiens GN=FKBP4 PE=1 SV=3	Q02790	FKBP4	52 kDa		unknown	25	0	109	0
280	TRUE	Empty	Coatomer subunit delta OS=Homo sapiens GN=ARCN1 PE=1 SV=1	P48444	ARCN1	57 kDa		unknown	34	1	94	8
281	TRUE	Empty	pre-rRNA processing protein FTSJ3 OS=Homo sapiens GN=FTSJ3 PE=1 SV=2	Q8IY81	FTSJ3	97 kDa		unknown	1	30	0	106
282	TRUE	Empty	Cluster of Isoform 2 of Prolyl 4-hydroxylase subunit alpha-1 OS=Homo sapiens GN=P4HA1 (P13674-2)	P13674-2 [3]	P4HA1	61 kDa	TRUE	unknown	24	0	106	3
282.1	TRUE	Empty	Isoform 2 of Prolyl 4-hydroxylase subunit alpha-1 OS=Homo sapiens GN=P4HA1	P13674-2 (+1)	P4HA1	61 kDa	TRUE	unknown	0	0	106	3
282.2	TRUE	Empty	Prolyl 4-hydroxylase subunit alpha-1 OS=Homo sapiens GN=P4HA1 PE=1 SV=2	P13674	P4HA1	61 kDa	TRUE	unknown	24	0	0	0
283	TRUE	Empty	tRNA (cytosine(34)-C(5))-methyltransferase OS=Homo sapiens GN=NSUN2 PE=1 SV=2	Q08J23	NSUN2	86 kDa		unknown	7	16	26	84
284	TRUE	Empty	Serine/arginine-rich splicing factor 5 OS=Homo sapiens GN=SRSF5 PE=1 SV=1	Q13243 (+1)	SRSF5	31 kDa	TRUE	unknown	0	28	0	105
285	TRUE	Empty	Zinc finger protein 622 OS=Homo sapiens GN=ZNF622 PE=1 SV=1	Q969S3	ZNF622	54 kDa		unknown	0	23	0	110
286	TRUE	Empty	Importin subunit alpha-1 OS=Homo sapiens GN=KPNA2 PE=1 SV=1	P52292	KPNA2	58 kDa		unknown	7	14	55	55
287	TRUE	Empty	Triosephosphate isomerase OS=Homo sapiens GN=TPI1 PE=1 SV=3	P60174	TPI1	31 kDa		unknown	20	0	108	0
288	TRUE	Empty	RNA-binding protein NOB1 OS=Homo sapiens GN=NOB1 PE=1 SV=1	Q9ULX3	NOB1	47 kDa		unknown	3	20	12	92
289	TRUE	Empty	Talin-1 OS=Homo sapiens GN=TLN1 PE=1 SV=3	Q9Y490	TLN1	270 kDa	TRUE	unknown	20	0	109	0
290	TRUE	Empty	Stress-70 protein, mitochondrial OS=Homo sapiens GN=HSPA9 PE=1 SV=2	P38646	HSPA9	74 kDa	TRUE	unknown	24	16	72	19
291	TRUE	Empty	DNA-dependent protein kinase catalytic subunit OS=Homo sapiens GN=PRKDC PE=1 SV=3	P78527	PRKDC	469 kDa		unknown	19	15	45	51
292	TRUE	Empty	E3 ubiquitin-protein ligase HUWE1 OS=Homo sapiens GN=HUWE1 PE=1 SV=3	Q7Z6Z7	HUWE1	482 kDa		unknown	25	0	102	0
293	TRUE	Empty	Eukaryotic translation initiation factor 3 subunit H OS=Homo sapiens GN=EIF3H PE=1 SV=1	O15372	EIF3H	40 kDa		unknown	16	9	60	41
294	TRUE	Empty	Leucine-rich repeat-containing protein 59 OS=Homo sapiens GN=LRRC59 PE=1 SV=1	Q96AG4	LRRC59	35 kDa		unknown	21	2	96	3
295	TRUE	Empty	Neutral alpha-glucosidase AB OS=Homo sapiens GN=GANAB PE=1 SV=3	Q14697	GANAB	107 kDa		unknown	19	0	102	0
296	TRUE	Empty	39S ribosomal protein L15, mitochondrial OS=Homo sapiens GN=MRPL15 PE=1 SV=1	Q9P015	MRPL15	33 kDa		unknown	0	21	1	101
297	TRUE	Empty	Eukaryotic translation initiation factor 2 subunit 3 OS=Homo sapiens GN=EIF2S3 PE=1 SV=3	P41091	EIF2S3	51 kDa		unknown	9	6	88	19
298	TRUE	Empty	Proline-, glutamic acid- and leucine-rich protein 1 OS=Homo sapiens GN=PELP1 PE=1 SV=2	Q8IZL8	PELP1	120 kDa		unknown	0	24	0	98
299	TRUE	Empty	Pyruvate dehydrogenase E1 component subunit alpha, somatic form, mitochondrial OS=Homo sapiens GN=PDHA1 PE=1 SV=3	P08559	PDHA1	43 kDa		unknown	0	25	0	94
300	TRUE	Empty	Trifunctional purine biosynthetic protein adenosine-3 OS=Homo sapiens GN=GART PE=1 SV=1	P22102	GART	108 kDa		unknown	16	0	107	0
301	TRUE	Empty	Prohibitin-2 OS=Homo sapiens GN=PHB2 PE=1 SV=2	Q99623	PHB2	33 kDa		unknown	8	15	22	73
302	TRUE	Empty	Exosome component 10 OS=Homo sapiens GN=EXOSC10 PE=1 SV=2	Q01780	EXOSC10	101 kDa		unknown	2	19	15	84
303	TRUE	Empty	Serine/arginine-rich splicing factor 4 OS=Homo sapiens GN=SRSF4 PE=1 SV=2	Q08170	SRSF4	57 kDa	TRUE	unknown	1	25	0	93
304	TRUE	Empty	Insulin-like growth factor 2 mRNA-binding protein 3 OS=Homo sapiens GN=IGF2BP3 PE=1 SV=2	O00425	IGF2BP3	64 kDa	TRUE	unknown	7	20	18	72
305	TRUE	Empty	DNA topoisomerase 2-alpha OS=Homo sapiens GN=TOP2A PE=1 SV=3	P11388	TOP2A	174 kDa	TRUE	unknown	1	33	0	86
306	TRUE	Empty	Heterochromatin protein 1-binding protein 3 OS=Homo sapiens GN=HP1BP3 PE=1 SV=1	Q5SSJ5	HP1BP3	61 kDa		unknown	1	27	0	93
307	TRUE	Empty	Histone H1x OS=Homo sapiens GN=H1FX PE=1 SV=1	Q92522	H1FX	22 kDa		unknown	0	20	0	95
308	TRUE	Empty	DNA replication licensing factor MCM5 OS=Homo sapiens GN=MCM5 PE=1 SV=5	P33992	MCM5	82 kDa		unknown	27	0	90	0
309	TRUE	Empty	Serine/arginine-rich splicing factor 6 OS=Homo sapiens GN=SRSF6 PE=1 SV=2	Q13247 (+1)	SRSF6	40 kDa	TRUE	unknown	0	23	0	93
310	TRUE	Empty	Protein disulfide-isomerase A6 OS=Homo sapiens GN=PDIA6 PE=1 SV=1	Q15084	PDIA6	48 kDa		unknown	23	0	93	0
311	TRUE	Empty	Eukaryotic translation initiation factor 3 subunit B OS=Homo sapiens GN=EIF3B PE=1 SV=3	P55884	EIF3B	92 kDa		unknown	17	12	46	42
312	TRUE	Empty	26S protease regulatory subunit 10B OS=Homo sapiens GN=PSMC6 PE=1 SV=1	P62333	PSMC6	44 kDa		unknown	10	11	48	45
313	TRUE	Empty	Cluster of Coronin-1C OS=Homo sapiens GN=CORO1C PE=1 SV=1 (Q9ULV4)	Q9ULV4 [2]	CORO1C	53 kDa	TRUE	unknown	36	0	82	0
313.1	TRUE	Empty	Coronin-1C OS=Homo sapiens GN=CORO1C PE=1 SV=1	Q9ULV4	CORO1C	53 kDa	TRUE	unknown	35	0	82	0
313.2	TRUE	Empty	Coronin-6 OS=Homo sapiens GN=CORO6 PE=1 SV=2	Q6QEF8	CORO6	53 kDa	TRUE	unknown	5	0	20	0
314	TRUE	Empty	Small nuclear ribonucleoprotein Sm D2 OS=Homo sapiens GN=SNRPD2 PE=1 SV=1	P62316	SNRPD2	14 kDa		unknown	14	5	32	65
315	TRUE	Empty	ATP synthase-coupling factor 6, mitochondrial OS=Homo sapiens GN=ATP5J PE=1 SV=1	P18859	ATP5J	13 kDa		unknown	2	12	13	84
316	TRUE	Empty	SWI/SNF complex subunit SMARCC2 OS=Homo sapiens GN=SMARCC2 PE=1 SV=1	Q8TAQ2	SMARCC2	133 kDa	TRUE	unknown	2	22	3	86
317	TRUE	Empty	Serine-threonine kinase receptor-associated protein OS=Homo sapiens GN=STRAP PE=1 SV=1	Q9Y3F4	STRAP	38 kDa		unknown	17	4	59	33
318	TRUE	Empty	NF-kappa-B-repressing factor OS=Homo sapiens GN=NKRF PE=1 SV=2	O15226	NKRF	78 kDa		unknown	0	22	0	90
319	TRUE	Empty	E3 ubiquitin-protein ligase UBR4 OS=Homo sapiens GN=UBR4 PE=1 SV=1	Q5T4S7	UBR4	574 kDa		unknown	12	12	45	47
320	TRUE	Empty	Transcriptional repressor p66-alpha OS=Homo sapiens GN=GATAD2A PE=1 SV=1	Q86YP4	GATAD2A	68 kDa	TRUE	unknown	13	11	57	31
321	TRUE	Empty	Metastasis-associated protein MTA2 OS=Homo sapiens GN=MTA2 PE=1 SV=1	O94776	MTA2	75 kDa	TRUE	unknown	21	8	67	18
322	TRUE	Empty	Heterogeneous nuclear ribonucleoprotein H OS=Homo sapiens GN=HNRNPH1 PE=1 SV=4	P31943	HNRNPH1	49 kDa	TRUE	unknown	14	6	73	15
323	TRUE	Empty	Eukaryotic translation initiation factor 3 subunit L OS=Homo sapiens GN=EIF3L PE=1 SV=1	Q9Y262	EIF3L	67 kDa		unknown	13	10	36	51
324	TRUE	Empty	Cluster of Prolyl 4-hydroxylase subunit alpha-2 OS=Homo sapiens GN=P4HA2 PE=1 SV=1 (O15460)	O15460 [2]	P4HA2	61 kDa	TRUE	unknown	16	0	93	0
324.1	TRUE	Empty	Prolyl 4-hydroxylase subunit alpha-2 OS=Homo sapiens GN=P4HA2 PE=1 SV=1	O15460	P4HA2	61 kDa	TRUE	unknown	16	0	92	0
324.2	TRUE	Empty	Isoform IIa of Prolyl 4-hydroxylase subunit alpha-2 OS=Homo sapiens GN=P4HA2	O15460-2	P4HA2	61 kDa	TRUE	unknown	0	0	93	0
325	TRUE	Empty	AP-3 complex subunit beta-1 OS=Homo sapiens GN=AP3B1 PE=1 SV=3	O00203	AP3B1	121 kDa		unknown	21	1	88	0
326	TRUE	Empty	Trifunctional enzyme subunit alpha, mitochondrial OS=Homo sapiens GN=HADHA PE=1 SV=2	P40939	HADHA	83 kDa		unknown	25	3	80	1
327	TRUE	Empty	Cluster of ATPase family AAA domain-containing protein 3A OS=Homo sapiens GN=ATAD3A PE=1 SV=2 (Q9NVI7)	Q9NVI7 [2]	ATAD3A	71 kDa	TRUE	unknown	4	28	3	72
327.1	TRUE	Empty	ATPase family AAA domain-containing protein 3A OS=Homo sapiens GN=ATAD3A PE=1 SV=2	Q9NVI7	ATAD3A	71 kDa	TRUE	unknown	3	24	3	57
327.2	TRUE	Empty	ATPase family AAA domain-containing protein 3B OS=Homo sapiens GN=ATAD3B PE=1 SV=1	Q5T9A4	ATAD3B	73 kDa	TRUE	unknown	4	18	0	45
328	TRUE	Empty	Eukaryotic translation initiation factor 3 subunit E OS=Homo sapiens GN=EIF3E PE=1 SV=1	P60228	EIF3E	52 kDa		unknown	7	8	33	58
329	TRUE	Empty	Cluster of S-adenosylmethionine synthase isoform type-2 OS=Homo sapiens GN=MAT2A PE=1 SV=1 (P31153)	P31153 [2]	MAT2A	44 kDa	TRUE	unknown	23	0	87	0
329.1	TRUE	Empty	S-adenosylmethionine synthase isoform type-2 OS=Homo sapiens GN=MAT2A PE=1 SV=1	P31153	MAT2A	44 kDa	TRUE	unknown	23	0	87	0
329.2	TRUE	Empty	S-adenosylmethionine synthase isoform type-1 OS=Homo sapiens GN=MAT1A PE=1 SV=2	Q00266	MAT1A	44 kDa	TRUE	unknown	0	0	0	0
330	TRUE	Empty	Probable 28S rRNA (cytosine(4447)-C(5))-methyltransferase OS=Homo sapiens GN=NOP2 PE=1 SV=2	P46087	NOP2	89 kDa		unknown	0	17	0	88
331	TRUE	Empty	Histone H4 OS=Homo sapiens GN=HIST1H4A PE=1 SV=2	P62805	HIST1H4A	11 kDa		unknown	0	14	1	89
332	TRUE	Empty	GTP-binding nuclear protein Ran OS=Homo sapiens GN=RAN PE=1 SV=3	P62826	RAN	24 kDa		unknown	18	0	89	0
333	TRUE	Empty	26S proteasome non-ATPase regulatory subunit 6 OS=Homo sapiens GN=PSMD6 PE=1 SV=1	Q15008	PSMD6	46 kDa		unknown	17	1	80	10
334	TRUE	Empty	U5 small nuclear ribonucleoprotein 40 kDa protein OS=Homo sapiens GN=SNRNP40 PE=1 SV=1	Q96DI7	SNRNP40	39 kDa		unknown	0	17	2	86
335	TRUE	Empty	Uncharacterized protein C7orf50 OS=Homo sapiens GN=C7orf50 PE=1 SV=1	Q9BRJ6	C7orf50	22 kDa		unknown	1	22	2	83
336	TRUE	Empty	DNA topoisomerase 2-beta OS=Homo sapiens GN=TOP2B PE=1 SV=3	Q02880	TOP2B	183 kDa	TRUE	unknown	0	32	0	72
337	TRUE	Empty	Transcriptional repressor p66-beta OS=Homo sapiens GN=GATAD2B PE=1 SV=1	Q8WXI9	GATAD2B	65 kDa	TRUE	unknown	14	4	69	19
338	TRUE	Empty	Squamous cell carcinoma antigen recognized by T-cells 3 OS=Homo sapiens GN=SART3 PE=1 SV=1	Q15020	SART3	110 kDa		unknown	15	9	61	23
339	TRUE	Empty	ATP synthase F(0) complex subunit B1, mitochondrial OS=Homo sapiens GN=ATP5F1 PE=1 SV=2	P24539	ATP5F1	29 kDa		unknown	2	23	3	76
340	TRUE	Empty	Aldehyde dehydrogenase family 16 member A1 OS=Homo sapiens GN=ALDH16A1 PE=1 SV=2	Q8IZ83	ALDH16A1	85 kDa		unknown	2	18	8	74
341	TRUE	Empty	Interleukin enhancer-binding factor 2 OS=Homo sapiens GN=ILF2 PE=1 SV=2	Q12905 (+1)	ILF2	43 kDa		unknown	1	21	6	78
342	TRUE	Empty	Signal recognition particle subunit SRP68 OS=Homo sapiens GN=SRP68 PE=1 SV=2	Q9UHB9	SRP68	71 kDa		unknown	23	2	67	9
343	TRUE	Empty	Phenylalanine--tRNA ligase beta subunit OS=Homo sapiens GN=FARSB PE=1 SV=3	Q9NSD9	FARSB	66 kDa		unknown	13	2	69	16
344	TRUE	Empty	Apoptosis-inducing factor 1, mitochondrial OS=Homo sapiens GN=AIFM1 PE=1 SV=1	O95831	AIFM1	67 kDa		unknown	15	1	81	1
345	TRUE	Empty	Vesicle-fusing ATPase OS=Homo sapiens GN=NSF PE=1 SV=3	P46459	NSF	83 kDa	TRUE	unknown	26	0	80	0
346	TRUE	Empty	Angiomotin OS=Homo sapiens GN=AMOT PE=1 SV=1	Q4VCS5	AMOT	118 kDa		unknown	24	1	79	0
347	TRUE	Empty	Heterogeneous nuclear ribonucleoprotein D0 OS=Homo sapiens GN=HNRNPD PE=1 SV=1	Q14103	HNRNPD	38 kDa	TRUE	unknown	14	13	28	47
348	TRUE	Empty	Threonine--tRNA ligase, cytoplasmic OS=Homo sapiens GN=TARS PE=1 SV=3	P26639	TARS	83 kDa		unknown	21	6	66	6
349	TRUE	Empty	Eukaryotic translation initiation factor 6 OS=Homo sapiens GN=EIF6 PE=1 SV=1	P56537	EIF6	27 kDa		unknown	1	12	5	78
350	TRUE	Empty	Growth arrest and DNA damage-inducible proteins-interacting protein 1 OS=Homo sapiens GN=GADD45GIP1 PE=1 SV=1	Q8TAE8	GADD45GIP1	25 kDa		unknown	0	21	1	74
351	TRUE	Empty	Isoform Non-brain of Clathrin light chain A OS=Homo sapiens GN=CLTA	P09496-2	CLTA	24 kDa		unknown	0	0	97	0
352	TRUE	Empty	Serine/threonine-protein kinase RIO1 OS=Homo sapiens GN=RIOK1 PE=1 SV=2	Q9BRS2	RIOK1	66 kDa		unknown	0	24	0	77
353	TRUE	Empty	Cluster of Annexin A2 OS=Homo sapiens GN=ANXA2 PE=1 SV=2 (P07355)	P07355 [2]	ANXA2	39 kDa	TRUE	unknown	13	1	81	0
353.1	TRUE	Empty	Annexin A2 OS=Homo sapiens GN=ANXA2 PE=1 SV=2	P07355	ANXA2	39 kDa	TRUE	unknown	13	1	81	0
353.2	TRUE	Empty	Putative annexin A2-like protein OS=Homo sapiens GN=ANXA2P2 PE=5 SV=2	A6NMY6	ANXA2P2	39 kDa	TRUE	unknown	8	0	74	0
354	TRUE	Empty	Profilin-1 OS=Homo sapiens GN=PFN1 PE=1 SV=2	P07737	PFN1	15 kDa		unknown	25	0	71	0
355	TRUE	Empty	Heterogeneous nuclear ribonucleoprotein M OS=Homo sapiens GN=HNRNPM PE=1 SV=3	P52272	HNRNPM	78 kDa		unknown	14	12	38	33
356	TRUE	Empty	Splicing factor 3B subunit 3 OS=Homo sapiens GN=SF3B3 PE=1 SV=4	Q15393	SF3B3	136 kDa		unknown	13	11	23	50
357	TRUE	Empty	39S ribosomal protein L46, mitochondrial OS=Homo sapiens GN=MRPL46 PE=1 SV=1	Q9H2W6	MRPL46	32 kDa		unknown	0	15	4	76
358	TRUE	Empty	Leucine-rich PPR motif-containing protein, mitochondrial OS=Homo sapiens GN=LRPPRC PE=1 SV=3	P42704	LRPPRC	158 kDa		unknown	26	0	74	1
359	TRUE	Empty	Cluster of 10 kDa heat shock protein, mitochondrial OS=Homo sapiens GN=HSPE1 PE=1 SV=2 (P61604)	P61604 [2]	HSPE1	11 kDa	TRUE	unknown	19	1	71	3
359.1	TRUE	Empty	10 kDa heat shock protein, mitochondrial OS=Homo sapiens GN=HSPE1 PE=1 SV=2	P61604	HSPE1	11 kDa	TRUE	unknown	19	1	71	0
359.2	TRUE	Empty	S4R3N1	S4R3N1		?	TRUE	unknown	0	0	20	3
360	TRUE	Empty	Eukaryotic translation initiation factor 3 subunit D OS=Homo sapiens GN=EIF3D PE=1 SV=1	O15371	EIF3D	64 kDa		unknown	12	7	34	41
361	TRUE	Empty	Proteasome subunit beta type-1 OS=Homo sapiens GN=PSMB1 PE=1 SV=2	P20618	PSMB1	26 kDa		unknown	29	1	68	0
362	TRUE	Empty	Nucleolar RNA helicase 2 OS=Homo sapiens GN=DDX21 PE=1 SV=5	Q9NR30	DDX21	87 kDa	TRUE	unknown	2	18	0	74
363	TRUE	Empty	Heterogeneous nuclear ribonucleoprotein R OS=Homo sapiens GN=HNRNPR PE=1 SV=1	O43390	HNRNPR	71 kDa	TRUE	unknown	5	17	13	56
364	TRUE	Empty	Ras GTPase-activating-like protein IQGAP1 OS=Homo sapiens GN=IQGAP1 PE=1 SV=1	P46940	IQGAP1	189 kDa	TRUE	unknown	15	1	76	0
365	TRUE	Empty	Kinesin light chain 1 OS=Homo sapiens GN=KLC1 PE=1 SV=2	Q07866	KLC1	65 kDa	TRUE	unknown	20	0	73	0
366	TRUE	Empty	Eukaryotic translation initiation factor 2 subunit 2 OS=Homo sapiens GN=EIF2S2 PE=1 SV=2	P20042	EIF2S2	38 kDa		unknown	11	6	46	29
367	TRUE	Empty	F-actin-capping protein subunit alpha-1 OS=Homo sapiens GN=CAPZA1 PE=1 SV=3	P52907	CAPZA1	33 kDa	TRUE	unknown	12	2	72	7
368	TRUE	Empty	28S ribosomal protein S35, mitochondrial OS=Homo sapiens GN=MRPS35 PE=1 SV=1	P82673	MRPS35	37 kDa		unknown	1	12	4	73
369	TRUE	Empty	Dynactin subunit 2 OS=Homo sapiens GN=DCTN2 PE=1 SV=4	Q13561	DCTN2	44 kDa		unknown	8	4	48	29
370	TRUE	Empty	Cluster of Transcription activator BRG1 OS=Homo sapiens GN=SMARCA4 PE=1 SV=2 (P51532)	P51532 [2]	SMARCA4	185 kDa	TRUE	unknown	5	19	5	63
370.1	TRUE	Empty	Transcription activator BRG1 OS=Homo sapiens GN=SMARCA4 PE=1 SV=2	P51532	SMARCA4	185 kDa	TRUE	unknown	4	19	5	63
370.2	TRUE	Empty	Probable global transcription activator SNF2L2 OS=Homo sapiens GN=SMARCA2 PE=1 SV=2	P51531	SMARCA2	181 kDa	TRUE	unknown	1	0	0	28
371	TRUE	Empty	Cluster of Gem-associated protein 2 OS=Homo sapiens GN=GEMIN2 PE=1 SV=1 (O14893)	O14893 [2]	GEMIN2	32 kDa	TRUE	unknown	3	15	11	62
371.1	TRUE	Empty	Gem-associated protein 2 OS=Homo sapiens GN=GEMIN2 PE=1 SV=1	O14893	GEMIN2	32 kDa	TRUE	unknown	3	15	8	51
371.2	TRUE	Empty	A0A3B3IU42	A0A3B3IU42		?	TRUE	unknown	0	0	11	62
372	TRUE	Empty	Actin-like protein 6A OS=Homo sapiens GN=ACTL6A PE=1 SV=1	O96019	ACTL6A	47 kDa		unknown	1	20	4	64
373	TRUE	Empty	RNA polymerase II-associated factor 1 homolog OS=Homo sapiens GN=PAF1 PE=1 SV=2	Q8N7H5	PAF1	60 kDa		unknown	27	0	63	0
374	TRUE	Empty	ATP synthase subunit g, mitochondrial OS=Homo sapiens GN=ATP5L PE=1 SV=3	O75964	ATP5L	11 kDa		unknown	0	23	8	57
375	TRUE	Empty	Proteasome subunit alpha type-3 OS=Homo sapiens GN=PSMA3 PE=1 SV=2	P25788	PSMA3	28 kDa		unknown	17	2	64	7
376	TRUE	Empty	Cytosol aminopeptidase OS=Homo sapiens GN=LAP3 PE=1 SV=3	P28838	LAP3	56 kDa		unknown	16	0	74	0
377	TRUE	Empty	Ras GTPase-activating protein-binding protein 1 OS=Homo sapiens GN=G3BP1 PE=1 SV=1	Q13283	G3BP1	52 kDa	TRUE	unknown	9	1	71	6
378	TRUE	Empty	COP9 signalosome complex subunit 3 OS=Homo sapiens GN=COPS3 PE=1 SV=3	Q9UNS2	COPS3	48 kDa		unknown	12	0	76	0
379	TRUE	Empty	Cluster of Dihydropyrimidinase-related protein 2 OS=Homo sapiens GN=DPYSL2 PE=1 SV=1 (Q16555)	Q16555 [3]	DPYSL2	62 kDa	TRUE	unknown	14	1	73	0
379.1	TRUE	Empty	Dihydropyrimidinase-related protein 2 OS=Homo sapiens GN=DPYSL2 PE=1 SV=1	Q16555	DPYSL2	62 kDa	TRUE	unknown	14	0	65	0
379.2	TRUE	Empty	A0A1C7CYX9	A0A1C7CYX9		?	TRUE	unknown	0	0	73	0
379.3	TRUE	Empty	Dihydropyrimidinase-related protein 1 OS=Homo sapiens GN=CRMP1 PE=1 SV=1	Q14194	CRMP1	62 kDa	TRUE	unknown	6	1	0	0
380	TRUE	Empty	Eukaryotic translation initiation factor 2 subunit 1 OS=Homo sapiens GN=EIF2S1 PE=1 SV=3	P05198	EIF2S1	36 kDa		unknown	11	13	41	22
381	TRUE	Empty	Ras-related protein Rab-7a OS=Homo sapiens GN=RAB7A PE=1 SV=1	P51149	RAB7A	23 kDa		unknown	12	1	74	2
382	TRUE	Empty	Survival motor neuron protein OS=Homo sapiens GN=SMN1 PE=1 SV=1	Q16637 (+3)	SMN1	32 kDa		unknown	3	19	10	56
383	TRUE	Empty	Cell division cycle 5-like protein OS=Homo sapiens GN=CDC5L PE=1 SV=2	Q99459	CDC5L	92 kDa		unknown	0	23	0	65
384	TRUE	Empty	U1 small nuclear ribonucleoprotein 70 kDa OS=Homo sapiens GN=SNRNP70 PE=1 SV=2	P08621	SNRNP70	52 kDa		unknown	2	13	3	66
385	TRUE	Empty	Activating signal cointegrator 1 complex subunit 3 OS=Homo sapiens GN=ASCC3 PE=1 SV=3	Q8N3C0	ASCC3	251 kDa		unknown	3	18	0	65
386	TRUE	Empty	SWI/SNF-related matrix-associated actin-dependent regulator of chromatin subfamily A member 5 OS=Homo sapiens GN=SMARCA5 PE=1 SV=1	O60264	SMARCA5	122 kDa	TRUE	unknown	0	17	2	64
387	TRUE	Empty	Cation-independent mannose-6-phosphate receptor OS=Homo sapiens GN=IGF2R PE=1 SV=3	P11717	IGF2R	274 kDa		unknown	5	19	1	61
388	TRUE	Empty	ATP-dependent RNA helicase DDX50 OS=Homo sapiens GN=DDX50 PE=1 SV=1	Q9BQ39	DDX50	83 kDa	TRUE	unknown	0	22	0	61
389	TRUE	Empty	Probable ATP-dependent RNA helicase DDX5 OS=Homo sapiens GN=DDX5 PE=1 SV=1	P17844	DDX5	69 kDa	TRUE	unknown	6	13	23	41
390	TRUE	Empty	Elongation factor Tu, mitochondrial OS=Homo sapiens GN=TUFM PE=1 SV=2	P49411	TUFM	50 kDa		unknown	19	0	69	0
391	TRUE	Empty	Signal recognition particle 54 kDa protein OS=Homo sapiens GN=SRP54 PE=1 SV=1	P61011	SRP54	56 kDa		unknown	18	0	65	1
392	TRUE	Empty	Cluster of Poly(rC)-binding protein 2 OS=Homo sapiens GN=PCBP2 PE=1 SV=1 (Q15366)	Q15366 [3]	PCBP2	39 kDa	TRUE	unknown	11	10	33	29
392.1	TRUE	Empty	Poly(rC)-binding protein 2 OS=Homo sapiens GN=PCBP2 PE=1 SV=1	Q15366	PCBP2	39 kDa	TRUE	unknown	9	6	30	20
392.2	TRUE	Empty	Poly(rC)-binding protein 1 OS=Homo sapiens GN=PCBP1 PE=1 SV=2	Q15365	PCBP1	37 kDa	TRUE	unknown	7	5	16	12
392.3	TRUE	Empty	Poly(rC)-binding protein 3 OS=Homo sapiens GN=PCBP3 PE=2 SV=2	P57721	PCBP3	39 kDa	TRUE	unknown	0	4	22	8
393	TRUE	Empty	Heterogeneous nuclear ribonucleoprotein K OS=Homo sapiens GN=HNRNPK PE=1 SV=1	P61978	HNRNPK	51 kDa		unknown	18	3	50	12
394	TRUE	Empty	Vinculin OS=Homo sapiens GN=VCL PE=1 SV=4	P18206	VCL	124 kDa		unknown	14	0	70	0
395	TRUE	Empty	Proteasome subunit beta type-5 OS=Homo sapiens GN=PSMB5 PE=1 SV=3	P28074	PSMB5	28 kDa		unknown	11	1	63	4
396	TRUE	Empty	Probable ATP-dependent RNA helicase DDX23 OS=Homo sapiens GN=DDX23 PE=1 SV=3	Q9BUQ8	DDX23	96 kDa		unknown	0	22	0	59
397	TRUE	Empty	39S ribosomal protein L1, mitochondrial OS=Homo sapiens GN=MRPL1 PE=1 SV=2	Q9BYD6	MRPL1	37 kDa		unknown	0	17	0	64
398	TRUE	Empty	Cluster of Heterogeneous nuclear ribonucleoprotein A1 OS=Homo sapiens GN=HNRNPA1 PE=1 SV=5 (P09651)	P09651 [2]	HNRNPA1	39 kDa	TRUE	unknown	11	7	42	25
398.1	TRUE	Empty	Heterogeneous nuclear ribonucleoprotein A1 OS=Homo sapiens GN=HNRNPA1 PE=1 SV=5	P09651	HNRNPA1	39 kDa	TRUE	unknown	10	7	42	25
398.2	TRUE	Empty	Heterogeneous nuclear ribonucleoprotein A1-like 2 OS=Homo sapiens GN=HNRNPA1L2 PE=2 SV=2	Q32P51	HNRNPA1L2	34 kDa	TRUE	unknown	7	0	26	11
399	TRUE	Empty	Cluster of Vigilin OS=Homo sapiens GN=HDLBP PE=1 SV=2 (Q00341)	Q00341 [2]	HDLBP	141 kDa	TRUE	unknown	7	13	26	36
399.1	TRUE	Empty	Vigilin OS=Homo sapiens GN=HDLBP PE=1 SV=2	Q00341	HDLBP	141 kDa	TRUE	unknown	7	13	21	29
399.2	TRUE	Empty	A0A024R4E5	A0A024R4E5		?	TRUE	unknown	0	0	26	36
400	TRUE	Empty	Cluster of Calcium/calmodulin-dependent protein kinase type II subunit delta OS=Homo sapiens GN=CAMK2D PE=1 SV=3 (Q13557)	Q13557 [3]	CAMK2D	56 kDa	TRUE	unknown	18	5	43	14
400.1	TRUE	Empty	Calcium/calmodulin-dependent protein kinase type II subunit delta OS=Homo sapiens GN=CAMK2D PE=1 SV=3	Q13557	CAMK2D	56 kDa	TRUE	unknown	17	5	42	14
400.2	TRUE	Empty	D6R938	D6R938		?	TRUE	unknown	0	0	43	14
400.3	TRUE	Empty	Calcium/calmodulin-dependent protein kinase type II subunit alpha OS=Homo sapiens GN=CAMK2A PE=1 SV=2	Q9UQM7	CAMK2A	54 kDa	TRUE	unknown	6	0	0	0
401	TRUE	Empty	Cluster of Sodium/potassium-transporting ATPase subunit alpha-1 OS=Homo sapiens GN=ATP1A1 PE=1 SV=1 (P05023)	P05023 [3]	ATP1A1	113 kDa	TRUE	unknown	12	3	62	5
401.1	TRUE	Empty	Sodium/potassium-transporting ATPase subunit alpha-1 OS=Homo sapiens GN=ATP1A1 PE=1 SV=1	P05023	ATP1A1	113 kDa	TRUE	unknown	12	3	62	5
401.2	TRUE	Empty	Sodium/potassium-transporting ATPase subunit alpha-2 OS=Homo sapiens GN=ATP1A2 PE=1 SV=1	P50993	ATP1A2	112 kDa	TRUE	unknown	0	0	26	0
401.3	TRUE	Empty	Potassium-transporting ATPase alpha chain 1 OS=Homo sapiens GN=ATP4A PE=2 SV=5	P20648	ATP4A	114 kDa	TRUE	unknown	0	0	14	0
402	TRUE	Empty	NADH-ubiquinone oxidoreductase 75 kDa subunit, mitochondrial OS=Homo sapiens GN=NDUFS1 PE=1 SV=3	P28331	NDUFS1	79 kDa		unknown	0	12	0	66
403	TRUE	Empty	CCR4-NOT transcription complex subunit 1 OS=Homo sapiens GN=CNOT1 PE=1 SV=2	A5YKK6	CNOT1	267 kDa		unknown	6	13	15	48
404	TRUE	Empty	Cofilin-1 OS=Homo sapiens GN=CFL1 PE=1 SV=3	P23528	CFL1	19 kDa	TRUE	unknown	14	1	64	0
405	TRUE	Empty	Cluster of Histone deacetylase 2 OS=Homo sapiens GN=HDAC2 PE=1 SV=2 (Q92769)	Q92769 [2]	HDAC2	55 kDa	TRUE	unknown	6	10	14	48
405.1	TRUE	Empty	Histone deacetylase 2 OS=Homo sapiens GN=HDAC2 PE=1 SV=2	Q92769	HDAC2	55 kDa	TRUE	unknown	6	6	14	41
405.2	TRUE	Empty	Histone deacetylase 1 OS=Homo sapiens GN=HDAC1 PE=1 SV=1	Q13547	HDAC1	55 kDa	TRUE	unknown	0	8	11	20
406	TRUE	Empty	Signal recognition particle subunit SRP72 OS=Homo sapiens GN=SRP72 PE=1 SV=3	O76094	SRP72	75 kDa		unknown	20	1	54	5
407	TRUE	Empty	SWI/SNF complex subunit SMARCC1 OS=Homo sapiens GN=SMARCC1 PE=1 SV=3	Q92922	SMARCC1	123 kDa	TRUE	unknown	3	21	2	54
408	TRUE	Empty	BAG family molecular chaperone regulator 2 OS=Homo sapiens GN=BAG2 PE=1 SV=1	O95816	BAG2	24 kDa		unknown	5	9	22	39
409	TRUE	Empty	39S ribosomal protein L11, mitochondrial OS=Homo sapiens GN=MRPL11 PE=1 SV=1	Q9Y3B7	MRPL11	21 kDa		unknown	2	13	4	55
410	TRUE	Empty	Protein disulfide-isomerase A4 OS=Homo sapiens GN=PDIA4 PE=1 SV=2	P13667	PDIA4	73 kDa		unknown	16	0	67	0
411	TRUE	Empty	28S ribosomal protein S9, mitochondrial OS=Homo sapiens GN=MRPS9 PE=1 SV=2	P82933	MRPS9	46 kDa		unknown	1	19	1	53
412	TRUE	Empty	60S ribosomal export protein NMD3 OS=Homo sapiens GN=NMD3 PE=1 SV=1	Q96D46	NMD3	58 kDa		unknown	1	12	0	60
413	TRUE	Empty	Coatomer subunit gamma-1 OS=Homo sapiens GN=COPG1 PE=1 SV=1	Q9Y678	COPG1	98 kDa	TRUE	unknown	10	1	57	4
414	TRUE	Empty	Cluster of Alpha-aminoadipic semialdehyde dehydrogenase OS=Homo sapiens GN=ALDH7A1 PE=1 SV=5 (P49419)	P49419 [2]	ALDH7A1	58 kDa	TRUE	unknown	13	0	66	0
414.1	TRUE	Empty	Alpha-aminoadipic semialdehyde dehydrogenase OS=Homo sapiens GN=ALDH7A1 PE=1 SV=5	P49419	ALDH7A1	58 kDa	TRUE	unknown	13	0	58	0
414.2	TRUE	Empty	Isoform 2 of Alpha-aminoadipic semialdehyde dehydrogenase OS=Homo sapiens GN=ALDH7A1	P49419-2	ALDH7A1	55 kDa	TRUE	unknown	0	0	66	0
415	TRUE	Empty	28S ribosomal protein S22, mitochondrial OS=Homo sapiens GN=MRPS22 PE=1 SV=1	P82650 (+2)	MRPS22	41 kDa		unknown	0	8	5	58
416	TRUE	Empty	ATP-dependent RNA helicase DDX1 OS=Homo sapiens GN=DDX1 PE=1 SV=2	Q92499	DDX1	82 kDa		unknown	12	4	50	9
417	TRUE	Empty	3-hydroxyacyl-CoA dehydrogenase type-2 OS=Homo sapiens GN=HSD17B10 PE=1 SV=3	Q99714	HSD17B10	27 kDa		unknown	13	0	62	0
418	TRUE	Empty	Cluster of F-actin-capping protein subunit beta OS=Homo sapiens GN=CAPZB PE=1 SV=4 (P47756)	P47756 [4]	CAPZB	31 kDa	TRUE	unknown	11	2	58	1
418.1	TRUE	Empty	F-actin-capping protein subunit beta OS=Homo sapiens GN=CAPZB PE=1 SV=4	P47756	CAPZB	31 kDa	TRUE	unknown	11	2	51	1
418.2	TRUE	Empty	Isoform 2 of F-actin-capping protein subunit beta OS=Homo sapiens GN=CAPZB	P47756-2 (+2)	CAPZB	31 kDa	TRUE	unknown	0	0	58	1
419	TRUE	Empty	U2 small nuclear ribonucleoprotein A' OS=Homo sapiens GN=SNRPA1 PE=1 SV=2	P09661	SNRPA1	28 kDa		unknown	15	5	39	17
420	TRUE	Empty	Protein disulfide-isomerase A3 OS=Homo sapiens GN=PDIA3 PE=1 SV=4	P30101	PDIA3	57 kDa		unknown	23	0	51	0
421	TRUE	Empty	Dihydrolipoyllysine-residue succinyltransferase component of 2-oxoglutarate dehydrogenase complex, mitochondrial OS=Homo sapiens GN=DLST PE=1 SV=4	P36957	DLST	49 kDa		unknown	6	8	22	37
422	TRUE	Empty	Thioredoxin-dependent peroxide reductase, mitochondrial OS=Homo sapiens GN=PRDX3 PE=1 SV=3	P30048	PRDX3	28 kDa		unknown	18	0	57	0
423	TRUE	Empty	MARCKS-related protein OS=Homo sapiens GN=MARCKSL1 PE=1 SV=2	P49006	MARCKSL1	20 kDa		unknown	15	0	56	0
424	TRUE	Empty	Cluster of UTP--glucose-1-phosphate uridylyltransferase OS=Homo sapiens GN=UGP2 PE=1 SV=5 (Q16851)	Q16851 [2]	UGP2	57 kDa	TRUE	unknown	12	0	59	0
424.1	TRUE	Empty	UTP--glucose-1-phosphate uridylyltransferase OS=Homo sapiens GN=UGP2 PE=1 SV=5	Q16851	UGP2	57 kDa	TRUE	unknown	12	0	53	0
424.2	TRUE	Empty	Isoform 2 of UTP--glucose-1-phosphate uridylyltransferase OS=Homo sapiens GN=UGP2	Q16851-2	UGP2	56 kDa	TRUE	unknown	0	0	59	0
425	TRUE	Empty	HIV Tat-specific factor 1 OS=Homo sapiens GN=HTATSF1 PE=1 SV=1	O43719	HTATSF1	86 kDa		unknown	16	0	52	1
426	TRUE	Empty	U2 small nuclear ribonucleoprotein B'' OS=Homo sapiens GN=SNRPB2 PE=1 SV=1	P08579	SNRPB2	25 kDa	TRUE	unknown	13	4	32	18
427	TRUE	Empty	Coatomer subunit beta OS=Homo sapiens GN=COPB1 PE=1 SV=3	P53618	COPB1	107 kDa		unknown	10	3	40	17
428	TRUE	Empty	mRNA export factor OS=Homo sapiens GN=RAE1 PE=1 SV=1	P78406	RAE1	41 kDa		unknown	0	12	1	55
429	TRUE	Empty	Serine/arginine-rich splicing factor 2 OS=Homo sapiens GN=SRSF2 PE=1 SV=4	Q01130 (+3)	SRSF2	25 kDa		unknown	0	12	4	50
430	TRUE	Empty	Putative helicase MOV-10 OS=Homo sapiens GN=MOV10 PE=1 SV=2	Q9HCE1	MOV10	114 kDa		unknown	0	15	0	52
431	TRUE	Empty	Endoribonuclease Dicer OS=Homo sapiens GN=DICER1 PE=1 SV=3	Q9UPY3	DICER1	219 kDa		unknown	1	17	0	48
432	TRUE	Empty	SWI/SNF-related matrix-associated actin-dependent regulator of chromatin subfamily E member 1 OS=Homo sapiens GN=SMARCE1 PE=1 SV=2	Q969G3	SMARCE1	47 kDa	TRUE	unknown	4	12	9	42
433	TRUE	Empty	39S ribosomal protein L45, mitochondrial OS=Homo sapiens GN=MRPL45 PE=1 SV=2	Q9BRJ2	MRPL45	35 kDa		unknown	1	8	0	56
434	TRUE	Empty	COP9 signalosome complex subunit 4 OS=Homo sapiens GN=COPS4 PE=1 SV=1	Q9BT78	COPS4	46 kDa		unknown	12	0	54	0
435	TRUE	Empty	DNA-directed RNA polymerase I subunit RPA1 OS=Homo sapiens GN=POLR1A PE=1 SV=2	O95602	POLR1A	195 kDa	TRUE	unknown	0	13	0	53
436	TRUE	Empty	26S proteasome non-ATPase regulatory subunit 7 OS=Homo sapiens GN=PSMD7 PE=1 SV=2	P51665	PSMD7	37 kDa		unknown	13	1	48	3
437	TRUE	Empty	Pentatricopeptide repeat domain-containing protein 3, mitochondrial OS=Homo sapiens GN=PTCD3 PE=1 SV=3	Q96EY7	PTCD3	79 kDa		unknown	0	12	0	53
438	TRUE	Empty	WD repeat-containing protein 18 OS=Homo sapiens GN=WDR18 PE=1 SV=2	Q9BV38 (+2)	WDR18	47 kDa		unknown	0	12	1	51
439	TRUE	Empty	Ribosomal biogenesis protein LAS1L OS=Homo sapiens GN=LAS1L PE=1 SV=2	Q9Y4W2	LAS1L	83 kDa		unknown	0	12	0	53
440	TRUE	Empty	THO complex subunit 1 OS=Homo sapiens GN=THOC1 PE=1 SV=1	Q96FV9	THOC1	76 kDa		unknown	0	16	0	49
441	TRUE	Empty	Eukaryotic translation initiation factor 5B OS=Homo sapiens GN=EIF5B PE=1 SV=4	O60841	EIF5B	139 kDa		unknown	10	5	23	28
442	TRUE	Empty	Creatine kinase U-type, mitochondrial OS=Homo sapiens GN=CKMT1A PE=1 SV=1	P12532	CKMT1A	47 kDa	TRUE	unknown	16	1	46	1
443	TRUE	Empty	DnaJ homolog subfamily A member 1 OS=Homo sapiens GN=DNAJA1 PE=1 SV=2	P31689	DNAJA1	45 kDa		unknown	7	3	49	4
444	TRUE	Empty	39S ribosomal protein L9, mitochondrial OS=Homo sapiens GN=MRPL9 PE=1 SV=2	Q9BYD2	MRPL9	30 kDa		unknown	1	16	0	46
445	TRUE	Empty	39S ribosomal protein L4, mitochondrial OS=Homo sapiens GN=MRPL4 PE=1 SV=1	Q9BYD3	MRPL4	35 kDa		unknown	2	10	0	51
446	TRUE	Empty	Cluster of Plastin-3 OS=Homo sapiens GN=PLS3 PE=1 SV=4 (P13797)	P13797 [3]	PLS3	71 kDa	TRUE	unknown	12	0	51	0
446.1	TRUE	Empty	Plastin-3 OS=Homo sapiens GN=PLS3 PE=1 SV=4	P13797	PLS3	71 kDa	TRUE	unknown	11	0	51	0
446.2	TRUE	Empty	Plastin-1 OS=Homo sapiens GN=PLS1 PE=1 SV=2	Q14651	PLS1	70 kDa	TRUE	unknown	6	0	16	0
446.3	TRUE	Empty	Plastin-2 OS=Homo sapiens GN=LCP1 PE=1 SV=6	P13796	LCP1	70 kDa	TRUE	unknown	1	0	9	0
447	TRUE	Empty	Acetyl-CoA acetyltransferase, mitochondrial OS=Homo sapiens GN=ACAT1 PE=1 SV=1	P24752	ACAT1	45 kDa	TRUE	unknown	17	0	44	0
448	TRUE	Empty	Condensin complex subunit 2 OS=Homo sapiens GN=NCAPH PE=1 SV=3	Q15003	NCAPH	83 kDa		unknown	12	0	52	0
449	TRUE	Empty	Probable ATP-dependent RNA helicase DDX17 OS=Homo sapiens GN=DDX17 PE=1 SV=2	Q92841	DDX17	80 kDa	TRUE	unknown	7	6	34	14
450	TRUE	Empty	Phenylalanine--tRNA ligase alpha subunit OS=Homo sapiens GN=FARSA PE=1 SV=3	Q9Y285	FARSA	58 kDa		unknown	8	5	35	16
451	TRUE	Empty	26S proteasome non-ATPase regulatory subunit 14 OS=Homo sapiens GN=PSMD14 PE=1 SV=1	O00487	PSMD14	35 kDa		unknown	9	2	43	6
452	TRUE	Empty	SRSF protein kinase 1 OS=Homo sapiens GN=SRPK1 PE=1 SV=2	Q96SB4	SRPK1	74 kDa	TRUE	unknown	1	12	2	44
453	TRUE	Empty	Sentrin-specific protease 3 OS=Homo sapiens GN=SENP3 PE=1 SV=2	Q9H4L4	SENP3	65 kDa		unknown	0	13	0	47
454	TRUE	Empty	Insulin-like growth factor 2 mRNA-binding protein 2 OS=Homo sapiens GN=IGF2BP2 PE=1 SV=2	Q9Y6M1	IGF2BP2	66 kDa	TRUE	unknown	7	9	12	34
455	TRUE	Empty	Malate dehydrogenase, mitochondrial OS=Homo sapiens GN=MDH2 PE=1 SV=3	P40926	MDH2	36 kDa		unknown	15	0	45	0
456	TRUE	Empty	Serine/threonine-protein phosphatase 2A 55 kDa regulatory subunit B alpha isoform OS=Homo sapiens GN=PPP2R2A PE=1 SV=1	P63151	PPP2R2A	52 kDa		unknown	10	0	50	0
457	TRUE	Empty	Cytoskeleton-associated protein 5 OS=Homo sapiens GN=CKAP5 PE=1 SV=3	Q14008	CKAP5	226 kDa		unknown	17	1	43	0
458	TRUE	Empty	Proteasome subunit beta type-7 OS=Homo sapiens GN=PSMB7 PE=1 SV=1	Q99436	PSMB7	30 kDa		unknown	13	0	45	0
459	TRUE	Empty	Kinesin light chain 2 OS=Homo sapiens GN=KLC2 PE=1 SV=1	Q9H0B6	KLC2	69 kDa	TRUE	unknown	14	0	46	0
460	TRUE	Empty	Cell division cycle protein 27 homolog OS=Homo sapiens GN=CDC27 PE=1 SV=2	P30260	CDC27	92 kDa		unknown	3	13	3	42
461	TRUE	Empty	Ribonucleases P/MRP protein subunit POP1 OS=Homo sapiens GN=POP1 PE=1 SV=2	Q99575	POP1	115 kDa		unknown	0	11	2	47
462	TRUE	Empty	RNA-binding protein 28 OS=Homo sapiens GN=RBM28 PE=1 SV=3	Q9NW13	RBM28	86 kDa		unknown	0	12	0	45
463	TRUE	Empty	39S ribosomal protein L39, mitochondrial OS=Homo sapiens GN=MRPL39 PE=1 SV=3	Q9NYK5	MRPL39	39 kDa		unknown	0	13	1	43
464	TRUE	Empty	28S ribosomal protein S7, mitochondrial OS=Homo sapiens GN=MRPS7 PE=1 SV=2	Q9Y2R9	MRPS7	28 kDa		unknown	1	8	0	48
465	TRUE	Empty	Cluster of Metastasis-associated protein MTA1 OS=Homo sapiens GN=MTA1 PE=1 SV=2 (Q13330)	Q13330 [2]	MTA1	81 kDa	TRUE	unknown	9	6	36	9
465.1	TRUE	Empty	Metastasis-associated protein MTA1 OS=Homo sapiens GN=MTA1 PE=1 SV=2	Q13330	MTA1	81 kDa	TRUE	unknown	9	6	35	9
465.2	TRUE	Empty	Isoform 3 of Metastasis-associated protein MTA1 OS=Homo sapiens GN=MTA1	Q13330-3	MTA1	79 kDa	TRUE	unknown	0	0	36	9
466	TRUE	Empty	4-trimethylaminobutyraldehyde dehydrogenase OS=Homo sapiens GN=ALDH9A1 PE=1 SV=3	P49189	ALDH9A1	54 kDa		unknown	13	0	44	0
467	TRUE	Empty	Galectin-3-binding protein OS=Homo sapiens GN=LGALS3BP PE=1 SV=1	Q08380	LGALS3BP	65 kDa		unknown	3	8	2	43
468	TRUE	Empty	Inorganic pyrophosphatase OS=Homo sapiens GN=PPA1 PE=1 SV=2	Q15181	PPA1	33 kDa		unknown	12	0	46	0
469	TRUE	Empty	28S ribosomal protein S18b, mitochondrial OS=Homo sapiens GN=MRPS18B PE=1 SV=1	Q9Y676	MRPS18B	29 kDa		unknown	1	11	0	45
470	TRUE	Empty	Sjoegren syndrome/scleroderma autoantigen 1 OS=Homo sapiens GN=SSSCA1 PE=1 SV=1	O60232	SSSCA1	21 kDa		unknown	9	8	26	16
471	TRUE	Empty	ATP synthase subunit gamma, mitochondrial OS=Homo sapiens GN=ATP5C1 PE=1 SV=1	P36542	ATP5C1	33 kDa		unknown	1	13	0	42
472	TRUE	Empty	Afadin OS=Homo sapiens GN=AFDN PE=1 SV=3	P55196	AFDN	207 kDa		unknown	15	0	44	0
473	TRUE	Empty	Bleomycin hydrolase OS=Homo sapiens GN=BLMH PE=1 SV=1	Q13867	BLMH	53 kDa		unknown	14	0	44	0
474	TRUE	Empty	Leucine-rich repeat flightless-interacting protein 1 OS=Homo sapiens GN=LRRFIP1 PE=1 SV=2	Q32MZ4	LRRFIP1	89 kDa	TRUE	unknown	12	0	43	0
475	TRUE	Empty	DnaJ homolog subfamily C member 7 OS=Homo sapiens GN=DNAJC7 PE=1 SV=2	Q99615	DNAJC7	56 kDa		unknown	17	0	39	0
476	TRUE	Empty	Cluster of Guanine nucleotide-binding protein G(I)/G(S)/G(T) subunit beta-1 OS=Homo sapiens GN=GNB1 PE=1 SV=3 (P62873)	P62873 [2]	GNB1	37 kDa	TRUE	unknown	18	0	40	0
476.1	TRUE	Empty	Guanine nucleotide-binding protein G(I)/G(S)/G(T) subunit beta-1 OS=Homo sapiens GN=GNB1 PE=1 SV=3	P62873	GNB1	37 kDa	TRUE	unknown	17	0	40	0
476.2	TRUE	Empty	Guanine nucleotide-binding protein subunit beta-4 OS=Homo sapiens GN=GNB4 PE=1 SV=3	Q9HAV0	GNB4	38 kDa	TRUE	unknown	4	0	0	0
477	TRUE	Empty	Cluster of Dihydropyrimidinase-related protein 3 OS=Homo sapiens GN=DPYSL3 PE=1 SV=1 (Q14195)	Q14195 [2]	DPYSL3	62 kDa	TRUE	unknown	11	0	48	0
477.1	TRUE	Empty	Dihydropyrimidinase-related protein 3 OS=Homo sapiens GN=DPYSL3 PE=1 SV=1	Q14195	DPYSL3	62 kDa	TRUE	unknown	11	0	43	0
477.2	TRUE	Empty	Isoform LCRMP-4 of Dihydropyrimidinase-related protein 3 OS=Homo sapiens GN=DPYSL3	Q14195-2	DPYSL3	74 kDa	TRUE	unknown	0	0	48	0
478	TRUE	Empty	Actin-related protein 2/3 complex subunit 3 OS=Homo sapiens GN=ARPC3 PE=1 SV=3	O15145	ARPC3	21 kDa		unknown	15	0	45	0
479	TRUE	Empty	CD2 antigen cytoplasmic tail-binding protein 2 OS=Homo sapiens GN=CD2BP2 PE=1 SV=1	O95400	CD2BP2	38 kDa		unknown	0	12	0	43
480	TRUE	Empty	General transcription factor II-I OS=Homo sapiens GN=GTF2I PE=1 SV=2	P78347	GTF2I	112 kDa		unknown	11	1	47	0
481	TRUE	Empty	eIF-2-alpha kinase activator GCN1 OS=Homo sapiens GN=GCN1 PE=1 SV=6	Q92616	GCN1	293 kDa		unknown	13	0	46	0
482	TRUE	Empty	Deoxyribose-phosphate aldolase OS=Homo sapiens GN=DERA PE=1 SV=2	Q9Y315	DERA	35 kDa		unknown	0	12	0	44
483	TRUE	Empty	AT-rich interactive domain-containing protein 2 OS=Homo sapiens GN=ARID2 PE=1 SV=2	Q68CP9	ARID2	197 kDa		unknown	0	11	0	44
484	TRUE	Empty	BTB/POZ domain-containing protein KCTD12 OS=Homo sapiens GN=KCTD12 PE=1 SV=1	Q96CX2	KCTD12	36 kDa		unknown	10	0	46	0
485	TRUE	Empty	Peptidyl-prolyl cis-trans isomerase FKBP5 OS=Homo sapiens GN=FKBP5 PE=1 SV=2	Q13451	FKBP5	51 kDa		unknown	13	0	42	0
486	TRUE	Empty	39S ribosomal protein L37, mitochondrial OS=Homo sapiens GN=MRPL37 PE=1 SV=2	Q9BZE1	MRPL37	48 kDa		unknown	1	11	0	40
487	TRUE	Empty	Cluster of Kinesin light chain 4 OS=Homo sapiens GN=KLC4 PE=1 SV=3 (Q9NSK0)	Q9NSK0 [2]	KLC4	69 kDa	TRUE	unknown	9	1	43	0
487.1	TRUE	Empty	Kinesin light chain 4 OS=Homo sapiens GN=KLC4 PE=1 SV=3	Q9NSK0	KLC4	69 kDa	TRUE	unknown	9	0	42	0
487.2	TRUE	Empty	Kinesin light chain 3 OS=Homo sapiens GN=KLC3 PE=1 SV=2	Q6P597	KLC3	55 kDa	TRUE	unknown	0	1	7	0
488	TRUE	Empty	Mitotic checkpoint protein BUB3 OS=Homo sapiens GN=BUB3 PE=1 SV=1	O43684	BUB3	37 kDa		unknown	10	0	41	0
489	TRUE	Empty	DnaJ homolog subfamily A member 2 OS=Homo sapiens GN=DNAJA2 PE=1 SV=1	O60884	DNAJA2	46 kDa		unknown	7	0	44	2
490	TRUE	Empty	Importin-7 OS=Homo sapiens GN=IPO7 PE=1 SV=1	O95373	IPO7	120 kDa		unknown	8	0	44	0
491	TRUE	Empty	Eukaryotic initiation factor 4A-III OS=Homo sapiens GN=EIF4A3 PE=1 SV=4	P38919	EIF4A3	47 kDa	TRUE	unknown	9	6	22	16
492	TRUE	Empty	Protein PRRC2A OS=Homo sapiens GN=PRRC2A PE=1 SV=3	P48634	PRRC2A	229 kDa		unknown	10	2	34	6
493	TRUE	Empty	THO complex subunit 2 OS=Homo sapiens GN=THOC2 PE=1 SV=2	Q8NI27	THOC2	183 kDa		unknown	1	7	0	44
494	TRUE	Empty	Exosome complex component RRP40 OS=Homo sapiens GN=EXOSC3 PE=1 SV=3	Q9NQT5	EXOSC3	30 kDa		unknown	3	9	6	35
495	TRUE	Empty	Serine/arginine repetitive matrix protein 2 OS=Homo sapiens GN=SRRM2 PE=1 SV=2	Q9UQ35	SRRM2	300 kDa		unknown	5	11	0	40
496	TRUE	Empty	Cofilin-2 OS=Homo sapiens GN=CFL2 PE=1 SV=1	Q9Y281	CFL2	19 kDa	TRUE	unknown	15	0	39	0
497	TRUE	Empty	Cluster of Superkiller viralicidic activity 2-like 2 OS=Homo sapiens GN=SKIV2L2 PE=1 SV=3 (P42285)	P42285 [2]	SKIV2L2	118 kDa	TRUE	unknown	0	12	2	38
497.1	TRUE	Empty	Superkiller viralicidic activity 2-like 2 OS=Homo sapiens GN=SKIV2L2 PE=1 SV=3	P42285	SKIV2L2	118 kDa	TRUE	unknown	0	0	2	38
497.2	TRUE	Empty	Exosome RNA helicase MTR4 OS=Homo sapiens OX=9606 GN=MTREX PE=1 SV=3	sp|P42285|MTREX_HUMAN		?	TRUE	unknown	0	12	0	0
498	TRUE	Empty	DNA-directed RNA polymerase III subunit RPC1 OS=Homo sapiens GN=POLR3A PE=1 SV=2	O14802	POLR3A	156 kDa	TRUE	unknown	0	12	0	38
499	TRUE	Empty	E3 ubiquitin-protein ligase UBR5 OS=Homo sapiens GN=UBR5 PE=1 SV=2	O95071	UBR5	309 kDa		unknown	0	13	0	41
500	TRUE	Empty	Serine/arginine-rich splicing factor 9 OS=Homo sapiens GN=SRSF9 PE=1 SV=1	Q13242	SRSF9	26 kDa		unknown	0	11	0	40
501	TRUE	Empty	39S ribosomal protein L13, mitochondrial OS=Homo sapiens GN=MRPL13 PE=1 SV=1	Q9BYD1	MRPL13	21 kDa		unknown	0	10	0	42
502	TRUE	Empty	6-phosphogluconate dehydrogenase, decarboxylating OS=Homo sapiens GN=PGD PE=1 SV=3	P52209	PGD	53 kDa		unknown	9	0	41	0
503	TRUE	Empty	RNA polymerase-associated protein LEO1 OS=Homo sapiens GN=LEO1 PE=1 SV=1	Q8WVC0	LEO1	75 kDa		unknown	12	0	38	0
504	TRUE	Empty	39S ribosomal protein L16, mitochondrial OS=Homo sapiens GN=MRPL16 PE=1 SV=1	Q9NX20	MRPL16	28 kDa		unknown	0	9	1	39
505	TRUE	Empty	Cluster of Glycogen phosphorylase, liver form OS=Homo sapiens GN=PYGL PE=1 SV=4 (P06737)	P06737 [2]	PYGL	97 kDa	TRUE	unknown	13	0	38	1
505.1	TRUE	Empty	Glycogen phosphorylase, liver form OS=Homo sapiens GN=PYGL PE=1 SV=4	P06737	PYGL	97 kDa	TRUE	unknown	12	0	38	1
505.2	TRUE	Empty	Glycogen phosphorylase, muscle form OS=Homo sapiens GN=PYGM PE=1 SV=6	P11217	PYGM	97 kDa	TRUE	unknown	2	0	0	0
506	TRUE	Empty	Cluster of Far upstream element-binding protein 2 OS=Homo sapiens GN=KHSRP PE=1 SV=4 (Q92945)	Q92945 [3]	KHSRP	73 kDa	TRUE	unknown	10	0	43	0
506.1	TRUE	Empty	Far upstream element-binding protein 2 OS=Homo sapiens GN=KHSRP PE=1 SV=4	Q92945	KHSRP	73 kDa	TRUE	unknown	8	0	30	0
506.2	TRUE	Empty	Far upstream element-binding protein 1 OS=Homo sapiens GN=FUBP1 PE=1 SV=3	Q96AE4	FUBP1	68 kDa	TRUE	unknown	4	0	13	0
506.3	TRUE	Empty	Far upstream element-binding protein 3 OS=Homo sapiens GN=FUBP3 PE=1 SV=2	Q96I24	FUBP3	62 kDa	TRUE	unknown	0	0	0	0
507	TRUE	Empty	Cluster of Glycine--tRNA ligase OS=Homo sapiens GN=GARS PE=1 SV=3 (P41250)	P41250 [2]	GARS	83 kDa	TRUE	unknown	14	0	40	0
507.1	TRUE	Empty	Glycine--tRNA ligase OS=Homo sapiens GN=GARS PE=1 SV=3	P41250	GARS	83 kDa	TRUE	unknown	0	0	40	0
507.2	TRUE	Empty	Glycine--tRNA ligase OS=Homo sapiens OX=9606 GN=GARS PE=1 SV=3	sp|P41250|GARS_HUMAN		?	TRUE	unknown	14	0	0	0
508	TRUE	Empty	Phosphoribosylformylglycinamidine synthase OS=Homo sapiens GN=PFAS PE=1 SV=4	O15067	PFAS	145 kDa		unknown	10	0	40	0
509	TRUE	Empty	Isoform 3 of 28S ribosomal protein S29, mitochondrial OS=Homo sapiens GN=DAP3	P51398-3	DAP3	42 kDa		unknown	0	0	6	42
510	TRUE	Empty	Cell division cycle protein 16 homolog OS=Homo sapiens GN=CDC16 PE=1 SV=2	Q13042	CDC16	72 kDa		unknown	3	10	10	25
511	TRUE	Empty	Cluster of Isoform 4 of 39S ribosomal protein L43, mitochondrial OS=Homo sapiens GN=MRPL43 (Q8N983-4)	Q8N983-4 [2]	MRPL43	18 kDa	TRUE	unknown	0	0	0	43
511.1	TRUE	Empty	Isoform 4 of 39S ribosomal protein L43, mitochondrial OS=Homo sapiens GN=MRPL43	Q8N983-4	MRPL43	18 kDa	TRUE	unknown	0	0	0	43
511.2	TRUE	Empty	39S ribosomal protein L43, mitochondrial OS=Homo sapiens GN=MRPL43 PE=1 SV=1	Q8N983	MRPL43	23 kDa	TRUE	unknown	0	0	0	30
512	TRUE	Empty	39S ribosomal protein L19, mitochondrial OS=Homo sapiens GN=MRPL19 PE=1 SV=2	P49406	MRPL19	34 kDa		unknown	1	10	0	36
513	TRUE	Empty	Splicing factor 3A subunit 1 OS=Homo sapiens GN=SF3A1 PE=1 SV=1	Q15459	SF3A1	89 kDa		unknown	8	3	34	5
514	TRUE	Empty	Coiled-coil domain-containing protein 124 OS=Homo sapiens GN=CCDC124 PE=1 SV=1	Q96CT7	CCDC124	26 kDa		unknown	2	11	3	32
515	TRUE	Empty	28S ribosomal protein S23, mitochondrial OS=Homo sapiens GN=MRPS23 PE=1 SV=2	Q9Y3D9	MRPS23	22 kDa		unknown	2	8	0	37
516	TRUE	Empty	26S proteasome non-ATPase regulatory subunit 12 OS=Homo sapiens GN=PSMD12 PE=1 SV=3	O00232	PSMD12	53 kDa		unknown	8	3	21	15
517	TRUE	Empty	Mitochondrial import receptor subunit TOM70 OS=Homo sapiens GN=TOMM70 PE=1 SV=1	O94826	TOMM70	67 kDa		unknown	8	0	41	0
518	TRUE	Empty	Ataxin-2-like protein OS=Homo sapiens GN=ATXN2L PE=1 SV=2	Q8WWM7	ATXN2L	113 kDa		unknown	10	0	38	1
519	TRUE	Empty	Dedicator of cytokinesis protein 7 OS=Homo sapiens GN=DOCK7 PE=1 SV=4	Q96N67	DOCK7	243 kDa		unknown	11	2	34	1
520	TRUE	Empty	Coatomer subunit epsilon OS=Homo sapiens GN=COPE PE=1 SV=3	O14579	COPE	34 kDa		unknown	6	7	19	17
521	TRUE	Empty	Protein transport protein Sec16A OS=Homo sapiens GN=SEC16A PE=1 SV=3	O15027	SEC16A	234 kDa		unknown	2	4	11	28
522	TRUE	Empty	Alanine--tRNA ligase, cytoplasmic OS=Homo sapiens GN=AARS PE=1 SV=2	P49588	AARS	107 kDa		unknown	8	0	39	0
523	TRUE	Empty	39S ribosomal protein L44, mitochondrial OS=Homo sapiens GN=MRPL44 PE=1 SV=1	Q9H9J2	MRPL44	38 kDa		unknown	0	16	0	29
524	TRUE	Empty	Transcription elongation factor SPT5 OS=Homo sapiens GN=SUPT5H PE=1 SV=1	O00267	SUPT5H	121 kDa		unknown	6	0	39	0
525	TRUE	Empty	Ribosomal L1 domain-containing protein 1 OS=Homo sapiens GN=RSL1D1 PE=1 SV=3	O76021	RSL1D1	55 kDa		unknown	2	9	0	35
526	TRUE	Empty	ATP-dependent RNA helicase DDX18 OS=Homo sapiens GN=DDX18 PE=1 SV=2	Q9NVP1	DDX18	75 kDa		unknown	0	8	0	37
527	TRUE	Empty	Cytoplasmic dynein 1 light intermediate chain 2 OS=Homo sapiens GN=DYNC1LI2 PE=1 SV=1	O43237	DYNC1LI2	54 kDa		unknown	2	6	3	32
528	TRUE	Empty	DNA-directed RNA polymerases I, II, and III subunit RPABC1 OS=Homo sapiens GN=POLR2E PE=1 SV=4	P19388 (+1)	POLR2E	25 kDa		unknown	4	3	10	26
529	TRUE	Empty	Trifunctional enzyme subunit beta, mitochondrial OS=Homo sapiens GN=HADHB PE=1 SV=3	P55084	HADHB	51 kDa		unknown	6	3	29	6
530	TRUE	Empty	Polypyrimidine tract-binding protein 1 OS=Homo sapiens GN=PTBP1 PE=1 SV=1	P26599	PTBP1	57 kDa		unknown	6	7	15	14
531	TRUE	Empty	Adenylosuccinate lyase OS=Homo sapiens GN=ADSL PE=1 SV=2	P30566	ADSL	55 kDa		unknown	13	0	30	0
532	TRUE	Empty	Peptidyl-tRNA hydrolase ICT1, mitochondrial OS=Homo sapiens GN=MRPL58 PE=1 SV=1	Q14197	MRPL58	24 kDa		unknown	1	11	2	28
533	TRUE	Empty	ELAV-like protein 1 OS=Homo sapiens GN=ELAVL1 PE=1 SV=2	Q15717	ELAVL1	36 kDa		unknown	2	9	11	20
534	TRUE	Empty	Ubiquitin carboxyl-terminal hydrolase 7 OS=Homo sapiens GN=USP7 PE=1 SV=2	Q93009	USP7	128 kDa		unknown	13	0	30	0
535	TRUE	Empty	Eukaryotic translation initiation factor 3 subunit F OS=Homo sapiens GN=EIF3F PE=1 SV=1	O00303	EIF3F	38 kDa		unknown	2	4	7	29
536	TRUE	Empty	Exosome complex component RRP45 OS=Homo sapiens GN=EXOSC9 PE=1 SV=3	Q06265 (+1)	EXOSC9	49 kDa		unknown	2	6	4	29
537	TRUE	Empty	WASH complex subunit 2A OS=Homo sapiens GN=WASHC2A PE=1 SV=3	Q641Q2	WASHC2A	147 kDa		unknown	8	0	33	0
538	TRUE	Empty	Kinectin OS=Homo sapiens GN=KTN1 PE=1 SV=1	Q86UP2	KTN1	156 kDa		unknown	4	6	13	20
539	TRUE	Empty	Thyroid hormone receptor-associated protein 3 OS=Homo sapiens GN=THRAP3 PE=1 SV=2	Q9Y2W1	THRAP3	109 kDa		unknown	1	4	0	36
540	TRUE	Empty	Cluster of Calcium/calmodulin-dependent protein kinase type II subunit gamma OS=Homo sapiens GN=CAMK2G PE=1 SV=3 (Q13555)	Q13555 [2]	CAMK2G	63 kDa	TRUE	unknown	7	4	21	10
540.1	TRUE	Empty	Calcium/calmodulin-dependent protein kinase type II subunit gamma OS=Homo sapiens GN=CAMK2G PE=1 SV=3	Q13555	CAMK2G	63 kDa	TRUE	unknown	7	4	21	10
540.2	TRUE	Empty	Calcium/calmodulin-dependent protein kinase type II subunit beta OS=Homo sapiens GN=CAMK2B PE=1 SV=3	Q13554	CAMK2B	73 kDa	TRUE	unknown	3	0	0	0
541	TRUE	Empty	Cellular tumor antigen p53 OS=Homo sapiens GN=TP53 PE=1 SV=4	P04637	TP53	44 kDa		unknown	1	9	0	33
542	TRUE	Empty	FACT complex subunit SSRP1 OS=Homo sapiens GN=SSRP1 PE=1 SV=1	Q08945	SSRP1	81 kDa		unknown	4	1	30	5
543	TRUE	Empty	DNA damage-binding protein 1 OS=Homo sapiens GN=DDB1 PE=1 SV=1	Q16531	DDB1	127 kDa		unknown	8	0	33	0
544	TRUE	Empty	Cluster of Protein kinase C-binding protein 1 OS=Homo sapiens GN=ZMYND8 PE=1 SV=2 (Q9ULU4)	Q9ULU4 [7]	ZMYND8	132 kDa	TRUE	unknown	0	9	0	32
544.1	TRUE	Empty	Protein kinase C-binding protein 1 OS=Homo sapiens GN=ZMYND8 PE=1 SV=2	Q9ULU4	ZMYND8	132 kDa	TRUE	unknown	0	9	0	27
544.2	TRUE	Empty	Isoform 13 of Protein kinase C-binding protein 1 OS=Homo sapiens GN=ZMYND8	Q9ULU4-13 (+5)	ZMYND8	132 kDa	TRUE	unknown	0	0	0	32
545	TRUE	Empty	Cluster of Transducin-like enhancer protein 3 OS=Homo sapiens GN=TLE3 PE=1 SV=2 (Q04726)	Q04726 [3]	TLE3	83 kDa	TRUE	unknown	11	0	30	0
545.1	TRUE	Empty	Transducin-like enhancer protein 3 OS=Homo sapiens GN=TLE3 PE=1 SV=2	Q04726	TLE3	83 kDa	TRUE	unknown	8	0	22	0
545.2	TRUE	Empty	Transducin-like enhancer protein 4 OS=Homo sapiens GN=TLE4 PE=1 SV=3	Q04727	TLE4	84 kDa	TRUE	unknown	5	0	10	0
545.3	TRUE	Empty	Transducin-like enhancer protein 1 OS=Homo sapiens GN=TLE1 PE=1 SV=2	Q04724	TLE1	83 kDa	TRUE	unknown	4	0	0	0
546	TRUE	Empty	DNA-directed RNA polymerase II subunit RPB1 OS=Homo sapiens GN=POLR2A PE=1 SV=2	P24928	POLR2A	217 kDa		unknown	6	2	25	8
547	TRUE	Empty	Liprin-alpha-1 OS=Homo sapiens GN=PPFIA1 PE=1 SV=1	Q13136	PPFIA1	136 kDa		unknown	6	0	34	0
548	TRUE	Empty	39S ribosomal protein L2, mitochondrial OS=Homo sapiens GN=MRPL2 PE=1 SV=2	Q5T653	MRPL2	33 kDa		unknown	0	13	0	27
549	TRUE	Empty	ATP-dependent RNA helicase DDX54 OS=Homo sapiens GN=DDX54 PE=1 SV=2	Q8TDD1	DDX54	99 kDa		unknown	0	8	0	31
550	TRUE	Empty	General transcription factor 3C polypeptide 2 OS=Homo sapiens GN=GTF3C2 PE=1 SV=2	Q8WUA4	GTF3C2	101 kDa		unknown	0	8	0	31
551	TRUE	Empty	5'-3' exoribonuclease 2 OS=Homo sapiens GN=XRN2 PE=1 SV=1	Q9H0D6	XRN2	109 kDa		unknown	4	11	6	21
552	TRUE	Empty	Testis-expressed protein 10 OS=Homo sapiens GN=TEX10 PE=1 SV=2	Q9NXF1	TEX10	106 kDa		unknown	0	8	0	31
553	TRUE	Empty	General transcription factor 3C polypeptide 4 OS=Homo sapiens GN=GTF3C4 PE=1 SV=2	Q9UKN8	GTF3C4	92 kDa		unknown	0	13	0	28
554	TRUE	Empty	Leucine-rich repeat flightless-interacting protein 2 OS=Homo sapiens GN=LRRFIP2 PE=1 SV=1	Q9Y608	LRRFIP2	82 kDa	TRUE	unknown	11	0	30	0
555	TRUE	Empty	Cluster of Heterogeneous nuclear ribonucleoproteins C1/C2 OS=Homo sapiens GN=HNRNPC PE=1 SV=4 (P07910)	P07910 [3]	HNRNPC	34 kDa	TRUE	unknown	2	6	9	26
555.1	TRUE	Empty	Heterogeneous nuclear ribonucleoproteins C1/C2 OS=Homo sapiens GN=HNRNPC PE=1 SV=4	P07910	HNRNPC	34 kDa	TRUE	unknown	1	5	9	26
555.2	TRUE	Empty	Heterogeneous nuclear ribonucleoprotein C-like 2 OS=Homo sapiens GN=HNRNPCL2 PE=1 SV=1	B2RXH8	HNRNPCL2	32 kDa	TRUE	unknown	0	2	0	6
555.3	TRUE	Empty	RNA-binding Raly-like protein OS=Homo sapiens GN=RALYL PE=1 SV=2	Q86SE5	RALYL	32 kDa	TRUE	unknown	0	2	0	3
556	TRUE	Empty	Protein transport protein Sec31A OS=Homo sapiens GN=SEC31A PE=1 SV=3	O94979	SEC31A	133 kDa		unknown	13	2	23	0
557	TRUE	Empty	Eukaryotic initiation factor 4A-I OS=Homo sapiens GN=EIF4A1 PE=1 SV=1	P60842	EIF4A1	46 kDa	TRUE	unknown	13	0	26	1
558	TRUE	Empty	AP-2 complex subunit beta OS=Homo sapiens GN=AP2B1 PE=1 SV=1	P63010	AP2B1	105 kDa	TRUE	unknown	7	2	27	3
559	TRUE	Empty	Condensin complex subunit 1 OS=Homo sapiens GN=NCAPD2 PE=1 SV=3	Q15021	NCAPD2	157 kDa		unknown	7	0	32	0
560	TRUE	Empty	Protein lin-28 homolog B OS=Homo sapiens GN=LIN28B PE=1 SV=1	Q6ZN17 (+1)	LIN28B	27 kDa		unknown	1	5	4	29
561	TRUE	Empty	Serine/threonine-protein kinase RIO2 OS=Homo sapiens GN=RIOK2 PE=1 SV=2	Q9BVS4	RIOK2	63 kDa		unknown	0	4	0	35
562	TRUE	Empty	39S ribosomal protein L47, mitochondrial OS=Homo sapiens GN=MRPL47 PE=1 SV=2	Q9HD33	MRPL47	29 kDa		unknown	0	11	1	27
563	TRUE	Empty	DNA-directed RNA polymerase III subunit RPC2 OS=Homo sapiens GN=POLR3B PE=1 SV=2	Q9NW08	POLR3B	128 kDa		unknown	0	10	0	30
564	TRUE	Empty	Cluster of Catenin alpha-1 OS=Homo sapiens GN=CTNNA1 PE=1 SV=1 (P35221)	P35221 [2]	CTNNA1	100 kDa	TRUE	unknown	11	1	29	1
564.1	TRUE	Empty	Catenin alpha-1 OS=Homo sapiens GN=CTNNA1 PE=1 SV=1	P35221	CTNNA1	100 kDa	TRUE	unknown	10	1	29	1
564.2	TRUE	Empty	Catenin alpha-2 OS=Homo sapiens GN=CTNNA2 PE=1 SV=5	P26232	CTNNA2	105 kDa	TRUE	unknown	4	0	10	0
565	TRUE	Empty	Pyruvate dehydrogenase protein X component, mitochondrial OS=Homo sapiens GN=PDHX PE=1 SV=3	O00330	PDHX	54 kDa		unknown	0	9	0	29
566	TRUE	Empty	U1 small nuclear ribonucleoprotein A OS=Homo sapiens GN=SNRPA PE=1 SV=3	P09012	SNRPA	31 kDa	TRUE	unknown	4	8	10	17
567	TRUE	Empty	Treacle protein OS=Homo sapiens GN=TCOF1 PE=1 SV=3	Q13428	TCOF1	152 kDa		unknown	4	6	10	20
568	TRUE	Empty	Cluster of Pre-mRNA-splicing factor ATP-dependent RNA helicase DHX15 OS=Homo sapiens GN=DHX15 PE=1 SV=2 (O43143)	O43143 [3]	DHX15	91 kDa	TRUE	unknown	3	11	3	22
568.1	TRUE	Empty	Pre-mRNA-splicing factor ATP-dependent RNA helicase DHX15 OS=Homo sapiens GN=DHX15 PE=1 SV=2	O43143	DHX15	91 kDa	TRUE	unknown	3	10	3	22
568.2	TRUE	Empty	ATP-dependent RNA helicase DHX8 OS=Homo sapiens GN=DHX8 PE=1 SV=1	Q14562	DHX8	139 kDa	TRUE	unknown	0	3	0	0
568.3	TRUE	Empty	Putative pre-mRNA-splicing factor ATP-dependent RNA helicase DHX16 OS=Homo sapiens GN=DHX16 PE=1 SV=2	O60231	DHX16	119 kDa	TRUE	unknown	0	0	0	0
569	TRUE	Empty	Tyrosine--tRNA ligase, cytoplasmic OS=Homo sapiens GN=YARS PE=1 SV=4	P54577	YARS	59 kDa		unknown	9	0	27	0
570	TRUE	Empty	THO complex subunit 5 homolog OS=Homo sapiens GN=THOC5 PE=1 SV=2	Q13769	THOC5	79 kDa		unknown	0	6	0	31
571	TRUE	Empty	Polynucleotide 5'-hydroxyl-kinase NOL9 OS=Homo sapiens GN=NOL9 PE=1 SV=1	Q5SY16	NOL9	79 kDa		unknown	1	6	0	31
572	TRUE	Empty	Zinc finger RNA-binding protein OS=Homo sapiens GN=ZFR PE=1 SV=2	Q96KR1	ZFR	117 kDa		unknown	3	7	4	24
573	TRUE	Empty	Bromodomain-containing protein 7 OS=Homo sapiens GN=BRD7 PE=1 SV=1	Q9NPI1	BRD7	74 kDa		unknown	0	8	0	29
574	TRUE	Empty	39S ribosomal protein L17, mitochondrial OS=Homo sapiens GN=MRPL17 PE=1 SV=1	Q9NRX2	MRPL17	20 kDa		unknown	0	7	0	30
575	TRUE	Empty	UDP-glucose:glycoprotein glucosyltransferase 1 OS=Homo sapiens GN=UGGT1 PE=1 SV=3	Q9NYU2	UGGT1	177 kDa		unknown	11	0	28	1
576	TRUE	Empty	DNA-directed RNA polymerase I subunit RPA34 OS=Homo sapiens GN=CD3EAP PE=1 SV=1	O15446	CD3EAP	55 kDa		unknown	0	10	1	26
577	TRUE	Empty	H/ACA ribonucleoprotein complex subunit 4 OS=Homo sapiens GN=DKC1 PE=1 SV=3	O60832	DKC1	58 kDa		unknown	0	6	0	29
578	TRUE	Empty	RNA cytidine acetyltransferase OS=Homo sapiens GN=NAT10 PE=1 SV=2	Q9H0A0	NAT10	116 kDa		unknown	0	11	0	27
579	TRUE	Empty	Probable ATP-dependent RNA helicase DDX20 OS=Homo sapiens GN=DDX20 PE=1 SV=2	Q9UHI6	DDX20	92 kDa		unknown	3	4	2	26
580	TRUE	Empty	Anaphase-promoting complex subunit 7 OS=Homo sapiens GN=ANAPC7 PE=1 SV=4	Q9UJX3	ANAPC7	67 kDa		unknown	1	4	7	23
581	TRUE	Empty	Dihydrolipoyl dehydrogenase, mitochondrial OS=Homo sapiens GN=DLD PE=1 SV=2	P09622	DLD	54 kDa		unknown	9	2	13	12
582	TRUE	Empty	28S ribosomal protein S5, mitochondrial OS=Homo sapiens GN=MRPS5 PE=1 SV=2	P82675	MRPS5	48 kDa		unknown	0	12	0	22
583	TRUE	Empty	General transcription factor 3C polypeptide 1 OS=Homo sapiens GN=GTF3C1 PE=1 SV=4	Q12789	GTF3C1	239 kDa		unknown	5	10	2	22
584	TRUE	Empty	Delta(3,5)-Delta(2,4)-dienoyl-CoA isomerase, mitochondrial OS=Homo sapiens GN=ECH1 PE=1 SV=2	Q13011	ECH1	36 kDa		unknown	8	0	26	0
585	TRUE	Empty	Filamin-C OS=Homo sapiens GN=FLNC PE=1 SV=3	Q14315	FLNC	291 kDa	TRUE	unknown	10	1	25	0
586	TRUE	Empty	Large subunit GTPase 1 homolog OS=Homo sapiens GN=LSG1 PE=1 SV=2	Q9H089	LSG1	75 kDa		unknown	0	13	0	21
587	TRUE	Empty	Melanoma-associated antigen D2 OS=Homo sapiens GN=MAGED2 PE=1 SV=2	Q9UNF1	MAGED2	65 kDa		unknown	9	1	28	0
588	TRUE	Empty	Cluster of E3 SUMO-protein ligase RanBP2 OS=Homo sapiens GN=RANBP2 PE=1 SV=2 (P49792)	P49792 [4]	RANBP2	358 kDa	TRUE	unknown	8	3	20	6
588.1	TRUE	Empty	E3 SUMO-protein ligase RanBP2 OS=Homo sapiens GN=RANBP2 PE=1 SV=2	P49792	RANBP2	358 kDa	TRUE	unknown	7	3	20	6
588.2	TRUE	Empty	RanBP2-like and GRIP domain-containing protein 3 OS=Homo sapiens GN=RGPD3 PE=4 SV=2	A6NKT7	RGPD3	197 kDa	TRUE	unknown	0	0	0	0
588.3	TRUE	Empty	RANBP2-like and GRIP domain-containing protein 8 OS=Homo sapiens GN=RGPD8 PE=1 SV=2	O14715 (+1)	RGPD8	199 kDa	TRUE	unknown	2	0	4	3
589	TRUE	Empty	Cluster of Phosphoglycerate mutase 1 OS=Homo sapiens GN=PGAM1 PE=1 SV=2 (P18669)	P18669 [2]	PGAM1	29 kDa	TRUE	unknown	4	0	33	0
589.1	TRUE	Empty	Phosphoglycerate mutase 1 OS=Homo sapiens GN=PGAM1 PE=1 SV=2	P18669	PGAM1	29 kDa	TRUE	unknown	4	0	33	0
589.2	TRUE	Empty	Probable phosphoglycerate mutase 4 OS=Homo sapiens GN=PGAM4 PE=3 SV=1	Q8N0Y7	PGAM4	29 kDa	TRUE	unknown	0	0	20	0
590	TRUE	Empty	DNA-directed RNA polymerases I and III subunit RPAC1 OS=Homo sapiens GN=POLR1C PE=1 SV=1	O15160	POLR1C	39 kDa		unknown	2	6	6	22
591	TRUE	Empty	Zinc finger CCCH domain-containing protein 11A OS=Homo sapiens GN=ZC3H11A PE=1 SV=3	O75152	ZC3H11A	89 kDa		unknown	0	8	0	26
592	TRUE	Empty	Citrate synthase, mitochondrial OS=Homo sapiens GN=CS PE=1 SV=2	O75390	CS	52 kDa		unknown	7	0	26	1
593	TRUE	Empty	Peptidyl-prolyl cis-trans isomerase B OS=Homo sapiens GN=PPIB PE=1 SV=2	P23284	PPIB	24 kDa		unknown	16	0	18	1
594	TRUE	Empty	Lon protease homolog, mitochondrial OS=Homo sapiens GN=LONP1 PE=1 SV=2	P36776	LONP1	106 kDa		unknown	7	0	28	0
595	TRUE	Empty	RNA-binding protein 34 OS=Homo sapiens GN=RBM34 PE=1 SV=2	P42696	RBM34	49 kDa		unknown	1	10	0	22
596	TRUE	Empty	DNA mismatch repair protein Msh6 OS=Homo sapiens GN=MSH6 PE=1 SV=2	P52701	MSH6	153 kDa		unknown	4	0	28	1
597	TRUE	Empty	Serine/threonine-protein phosphatase 5 OS=Homo sapiens GN=PPP5C PE=1 SV=1	P53041	PPP5C	57 kDa		unknown	9	0	25	0
598	TRUE	Empty	RNA-binding protein 39 OS=Homo sapiens GN=RBM39 PE=1 SV=2	Q14498	RBM39	59 kDa		unknown	0	8	0	26
599	TRUE	Empty	THO complex subunit 6 homolog OS=Homo sapiens GN=THOC6 PE=1 SV=1	Q86W42	THOC6	38 kDa		unknown	0	8	0	27
600	TRUE	Empty	39S ribosomal protein L50, mitochondrial OS=Homo sapiens GN=MRPL50 PE=1 SV=2	Q8N5N7	MRPL50	18 kDa		unknown	1	8	3	24
601	TRUE	Empty	Protein enabled homolog OS=Homo sapiens GN=ENAH PE=1 SV=2	Q8N8S7	ENAH	67 kDa		unknown	7	0	28	0
602	TRUE	Empty	Polyribonucleotide nucleotidyltransferase 1, mitochondrial OS=Homo sapiens GN=PNPT1 PE=1 SV=2	Q8TCS8	PNPT1	86 kDa		unknown	7	0	27	0
603	TRUE	Empty	28S ribosomal protein S31, mitochondrial OS=Homo sapiens GN=MRPS31 PE=1 SV=3	Q92665	MRPS31	45 kDa		unknown	1	7	0	26
604	TRUE	Empty	Acetyl-CoA acetyltransferase, cytosolic OS=Homo sapiens GN=ACAT2 PE=1 SV=2	Q9BWD1	ACAT2	41 kDa		unknown	5	0	30	0
605	TRUE	Empty	Coiled-coil domain-containing protein 86 OS=Homo sapiens GN=CCDC86 PE=1 SV=1	Q9H6F5	CCDC86	40 kDa		unknown	0	3	0	31
606	TRUE	Empty	Cluster of Putative RNA-binding protein Luc7-like 2 OS=Homo sapiens GN=LUC7L2 PE=1 SV=2 (Q9Y383)	Q9Y383 [2]	LUC7L2	47 kDa	TRUE	unknown	2	8	8	16
606.1	TRUE	Empty	Putative RNA-binding protein Luc7-like 2 OS=Homo sapiens GN=LUC7L2 PE=1 SV=2	Q9Y383	LUC7L2	47 kDa	TRUE	unknown	2	7	8	16
606.2	TRUE	Empty	Putative RNA-binding protein Luc7-like 1 OS=Homo sapiens GN=LUC7L PE=1 SV=1	Q9NQ29	LUC7L	44 kDa	TRUE	unknown	1	3	8	5
607	TRUE	Empty	Cluster of 2-oxoglutarate dehydrogenase, mitochondrial OS=Homo sapiens GN=OGDH PE=1 SV=3 (Q02218)	Q02218 [2]	OGDH	116 kDa	TRUE	unknown	4	6	8	18
607.1	TRUE	Empty	2-oxoglutarate dehydrogenase, mitochondrial OS=Homo sapiens GN=OGDH PE=1 SV=3	Q02218	OGDH	116 kDa	TRUE	unknown	3	6	8	18
607.2	TRUE	Empty	2-oxoglutarate dehydrogenase-like, mitochondrial OS=Homo sapiens GN=OGDHL PE=1 SV=3	Q9ULD0	OGDHL	114 kDa	TRUE	unknown	0	0	0	4
608	TRUE	Empty	Surfeit locus protein 6 OS=Homo sapiens GN=SURF6 PE=1 SV=3	O75683	SURF6	41 kDa		unknown	0	8	0	24
609	TRUE	Empty	NADH dehydrogenase [ubiquinone] flavoprotein 2, mitochondrial OS=Homo sapiens GN=NDUFV2 PE=1 SV=2	P19404	NDUFV2	27 kDa		unknown	0	6	0	27
610	TRUE	Empty	Hydroxymethylglutaryl-CoA synthase, cytoplasmic OS=Homo sapiens GN=HMGCS1 PE=1 SV=2	Q01581	HMGCS1	57 kDa		unknown	7	0	27	0
611	TRUE	Empty	Zinc finger CCHC domain-containing protein 8 OS=Homo sapiens GN=ZCCHC8 PE=1 SV=2	Q6NZY4	ZCCHC8	79 kDa		unknown	1	6	0	26
612	TRUE	Empty	Bromodomain adjacent to zinc finger domain protein 1A OS=Homo sapiens GN=BAZ1A PE=1 SV=2	Q9NRL2	BAZ1A	179 kDa		unknown	0	8	0	26
613	TRUE	Empty	Cluster of Probable ubiquitin carboxyl-terminal hydrolase FAF-X OS=Homo sapiens GN=USP9X PE=1 SV=3 (Q93008)	Q93008 [2]	USP9X	292 kDa	TRUE	unknown	12	0	23	0
613.1	TRUE	Empty	Probable ubiquitin carboxyl-terminal hydrolase FAF-X OS=Homo sapiens GN=USP9X PE=1 SV=3	Q93008	USP9X	292 kDa	TRUE	unknown	11	0	23	0
613.2	TRUE	Empty	Probable ubiquitin carboxyl-terminal hydrolase FAF-Y OS=Homo sapiens GN=USP9Y PE=2 SV=2	O00507	USP9Y	291 kDa	TRUE	unknown	6	0	1	0
614	TRUE	Empty	Microtubule-associated protein 1B OS=Homo sapiens GN=MAP1B PE=1 SV=2	P46821	MAP1B	271 kDa		unknown	5	0	26	0
615	TRUE	Empty	Protein transport protein Sec24C OS=Homo sapiens GN=SEC24C PE=1 SV=3	P53992	SEC24C	118 kDa		unknown	6	0	26	0
616	TRUE	Empty	Double-stranded RNA-specific adenosine deaminase OS=Homo sapiens GN=ADAR PE=1 SV=4	P55265	ADAR	136 kDa		unknown	0	7	0	25
617	TRUE	Empty	Acetyl-CoA carboxylase 1 OS=Homo sapiens GN=ACACA PE=1 SV=2	Q13085	ACACA	266 kDa	TRUE	unknown	9	0	25	0
618	TRUE	Empty	TBC1 domain family member 5 OS=Homo sapiens GN=TBC1D5 PE=1 SV=1	Q92609	TBC1D5	89 kDa		unknown	9	0	23	0
619	TRUE	Empty	DNA-directed RNA polymerase III subunit RPC5 OS=Homo sapiens GN=POLR3E PE=1 SV=1	Q9NVU0	POLR3E	80 kDa		unknown	1	5	4	23
620	TRUE	Empty	E3 ubiquitin-protein ligase CHIP OS=Homo sapiens GN=STUB1 PE=1 SV=2	Q9UNE7	STUB1	35 kDa		unknown	5	4	21	2
621	TRUE	Empty	Hypoxia up-regulated protein 1 OS=Homo sapiens GN=HYOU1 PE=1 SV=1	Q9Y4L1	HYOU1	111 kDa		unknown	7	0	25	0
622	TRUE	Empty	Cold shock domain-containing protein E1 OS=Homo sapiens GN=CSDE1 PE=1 SV=2	O75534	CSDE1	89 kDa		unknown	12	0	21	0
623	TRUE	Empty	Actin-related protein 3 OS=Homo sapiens GN=ACTR3 PE=1 SV=3	P61158	ACTR3	47 kDa		unknown	7	0	26	0
624	TRUE	Empty	Procollagen galactosyltransferase 1 OS=Homo sapiens GN=COLGALT1 PE=1 SV=1	Q8NBJ5	COLGALT1	72 kDa		unknown	4	2	17	8
625	TRUE	Empty	Striatin-3 OS=Homo sapiens GN=STRN3 PE=1 SV=3	Q13033	STRN3	87 kDa	TRUE	unknown	8	2	21	0
626	TRUE	Empty	ATP-dependent RNA helicase DDX3X OS=Homo sapiens GN=DDX3X PE=1 SV=3	O00571	DDX3X	73 kDa	TRUE	unknown	7	2	16	5
627	TRUE	Empty	Isoform C of AP-1 complex subunit beta-1 OS=Homo sapiens GN=AP1B1	Q10567-3 (+1)	AP1B1	104 kDa	TRUE	unknown	0	0	30	0
628	TRUE	Empty	Protein flightless-1 homolog OS=Homo sapiens GN=FLII PE=1 SV=2	Q13045	FLII	145 kDa		unknown	6	0	24	0
629	TRUE	Empty	Zinc finger CCCH-type antiviral protein 1 OS=Homo sapiens GN=ZC3HAV1 PE=1 SV=3	Q7Z2W4	ZC3HAV1	101 kDa		unknown	2	3	4	20
630	TRUE	Empty	AP-2 complex subunit mu OS=Homo sapiens GN=AP2M1 PE=1 SV=2	Q96CW1	AP2M1	50 kDa		unknown	7	3	15	4
631	TRUE	Empty	26S proteasome non-ATPase regulatory subunit 13 OS=Homo sapiens GN=PSMD13 PE=1 SV=2	Q9UNM6	PSMD13	43 kDa		unknown	8	0	20	3
632	TRUE	Empty	Cluster of Kanadaptin OS=Homo sapiens GN=SLC4A1AP PE=1 SV=1 (Q9BWU0)	Q9BWU0 [2]	SLC4A1AP	89 kDa	TRUE	unknown	6	1	19	4
632.1	TRUE	Empty	Kanadaptin OS=Homo sapiens GN=SLC4A1AP PE=1 SV=1	Q9BWU0	SLC4A1AP	89 kDa	TRUE	unknown	6	1	17	4
632.2	TRUE	Empty	A0A087X0M4	A0A087X0M4		?	TRUE	unknown	0	0	19	4
633	TRUE	Empty	Cluster of RNA-binding motif protein, X chromosome OS=Homo sapiens GN=RBMX PE=1 SV=3 (P38159)	P38159 [2]	RBMX	42 kDa	TRUE	unknown	0	10	2	17
633.1	TRUE	Empty	RNA-binding motif protein, X chromosome OS=Homo sapiens GN=RBMX PE=1 SV=3	P38159	RBMX	42 kDa	TRUE	unknown	0	10	2	17
633.2	TRUE	Empty	RNA binding motif protein, X-linked-like-1 OS=Homo sapiens GN=RBMXL1 PE=1 SV=1	Q96E39	RBMXL1	42 kDa	TRUE	unknown	0	5	2	11
634	TRUE	Empty	N-alpha-acetyltransferase 10 OS=Homo sapiens GN=NAA10 PE=1 SV=1	P41227	NAA10	26 kDa		unknown	8	0	21	0
635	TRUE	Empty	Ran GTPase-activating protein 1 OS=Homo sapiens GN=RANGAP1 PE=1 SV=1	P46060	RANGAP1	64 kDa		unknown	7	1	21	0
636	TRUE	Empty	Probable ATP-dependent RNA helicase DDX27 OS=Homo sapiens GN=DDX27 PE=1 SV=2	Q96GQ7	DDX27	90 kDa		unknown	0	7	0	22
637	TRUE	Empty	Midasin OS=Homo sapiens GN=MDN1 PE=1 SV=2	Q9NU22	MDN1	633 kDa		unknown	0	7	0	22
638	TRUE	Empty	Heterogeneous nuclear ribonucleoprotein A/B OS=Homo sapiens GN=HNRNPAB PE=1 SV=2	Q99729	HNRNPAB	36 kDa	TRUE	unknown	9	10	6	6
639	TRUE	Empty	Guanine nucleotide-binding protein G(I)/G(S)/G(O) subunit gamma-5 OS=Homo sapiens GN=GNG5 PE=1 SV=3	P63218	GNG5	7 kDa		unknown	7	0	21	0
640	TRUE	Empty	Centrosomal protein of 170 kDa OS=Homo sapiens GN=CEP170 PE=1 SV=1	Q5SW79	CEP170	175 kDa		unknown	12	1	18	0
641	TRUE	Empty	TRMT1-like protein OS=Homo sapiens GN=TRMT1L PE=1 SV=2	Q7Z2T5	TRMT1L	82 kDa		unknown	2	5	2	19
642	TRUE	Empty	Cell cycle and apoptosis regulator protein 2 OS=Homo sapiens GN=CCAR2 PE=1 SV=2	Q8N163	CCAR2	103 kDa		unknown	5	0	22	0
643	TRUE	Empty	Protein KRI1 homolog OS=Homo sapiens GN=KRI1 PE=1 SV=3	Q8N9T8	KRI1	83 kDa		unknown	0	4	0	23
644	TRUE	Empty	Obg-like ATPase 1 OS=Homo sapiens GN=OLA1 PE=1 SV=2	Q9NTK5	OLA1	45 kDa		unknown	9	0	19	0
645	TRUE	Empty	RRP15-like protein OS=Homo sapiens GN=RRP15 PE=1 SV=2	Q9Y3B9	RRP15	31 kDa		unknown	0	12	0	15
646	TRUE	Empty	U4/U6 small nuclear ribonucleoprotein Prp3 OS=Homo sapiens GN=PRPF3 PE=1 SV=2	O43395	PRPF3	78 kDa		unknown	1	5	2	20
647	TRUE	Empty	Malate dehydrogenase, cytoplasmic OS=Homo sapiens GN=MDH1 PE=1 SV=4	P40925	MDH1	36 kDa		unknown	8	0	19	0
648	TRUE	Empty	Nuclear autoantigenic sperm protein OS=Homo sapiens GN=NASP PE=1 SV=2	P49321	NASP	85 kDa		unknown	5	0	22	0
649	TRUE	Empty	Apoptotic chromatin condensation inducer in the nucleus OS=Homo sapiens GN=ACIN1 PE=1 SV=2	Q9UKV3	ACIN1	152 kDa		unknown	0	7	0	18
650	TRUE	Empty	Paraneoplastic antigen Ma2 OS=Homo sapiens GN=PNMA2 PE=1 SV=2	Q9UL42	PNMA2	42 kDa		unknown	7	4	12	6
651	TRUE	Empty	C-Jun-amino-terminal kinase-interacting protein 4 OS=Homo sapiens GN=SPAG9 PE=1 SV=4	O60271	SPAG9	146 kDa		unknown	10	0	17	0
652	TRUE	Empty	Nuclear pore complex protein Nup153 OS=Homo sapiens GN=NUP153 PE=1 SV=2	P49790	NUP153	154 kDa		unknown	8	0	17	1
653	TRUE	Empty	Cytoskeleton-associated protein 4 OS=Homo sapiens GN=CKAP4 PE=1 SV=2	Q07065	CKAP4	66 kDa		unknown	6	0	19	0
654	TRUE	Empty	SWI/SNF-related matrix-associated actin-dependent regulator of chromatin subfamily D member 1 OS=Homo sapiens GN=SMARCD1 PE=1 SV=2	Q96GM5	SMARCD1	58 kDa		unknown	0	7	2	15
655	TRUE	Empty	Nucleolar protein 58 OS=Homo sapiens GN=NOP58 PE=1 SV=1	Q9Y2X3	NOP58	60 kDa		unknown	1	6	1	16
656	TRUE	Empty	Eukaryotic translation initiation factor 4 gamma 3 OS=Homo sapiens GN=EIF4G3 PE=1 SV=2	O43432	EIF4G3	177 kDa	TRUE	unknown	10	0	17	0
657	TRUE	Empty	Cluster of Ezrin OS=Homo sapiens GN=EZR PE=1 SV=4 (P15311)	P15311 [3]	EZR	69 kDa	TRUE	unknown	23	0	7	0
657.1	TRUE	Empty	Ezrin OS=Homo sapiens GN=EZR PE=1 SV=4	P15311	EZR	69 kDa	TRUE	unknown	16	0	7	0
657.2	TRUE	Empty	Moesin OS=Homo sapiens GN=MSN PE=1 SV=3	P26038	MSN	68 kDa	TRUE	unknown	13	0	0	0
657.3	TRUE	Empty	Radixin OS=Homo sapiens GN=RDX PE=1 SV=1	P35241	RDX	69 kDa	TRUE	unknown	13	0	0	0
658	TRUE	Empty	Exportin-2 OS=Homo sapiens GN=CSE1L PE=1 SV=3	P55060	CSE1L	110 kDa		unknown	7	0	17	0
659	TRUE	Empty	Parafibromin OS=Homo sapiens GN=CDC73 PE=1 SV=1	Q6P1J9	CDC73	61 kDa		unknown	10	0	15	0
660	TRUE	Empty	ATP-binding cassette sub-family F member 1 OS=Homo sapiens GN=ABCF1 PE=1 SV=2	Q8NE71	ABCF1	96 kDa		unknown	5	3	13	4
661	TRUE	Empty	COP9 signalosome complex subunit 5 OS=Homo sapiens GN=COPS5 PE=1 SV=4	Q92905	COPS5	38 kDa		unknown	7	0	17	0
662	TRUE	Empty	Anaphase-promoting complex subunit 1 OS=Homo sapiens GN=ANAPC1 PE=1 SV=1	Q9H1A4	ANAPC1	217 kDa		unknown	0	3	0	20
663	TRUE	Empty	Double-stranded RNA-binding protein Staufen homolog 2 OS=Homo sapiens GN=STAU2 PE=1 SV=1	Q9NUL3	STAU2	63 kDa	TRUE	unknown	0	4	1	18
664	TRUE	Empty	WD repeat-containing protein 61 OS=Homo sapiens GN=WDR61 PE=1 SV=1	Q9GZS3	WDR61	34 kDa		unknown	9	0	14	1
665	TRUE	Empty	Protein SON OS=Homo sapiens GN=SON PE=1 SV=4	P18583	SON	264 kDa		unknown	2	7	0	15
666	TRUE	Empty	Transcription initiation factor TFIID subunit 6 OS=Homo sapiens GN=TAF6 PE=1 SV=1	P49848	TAF6	73 kDa		unknown	1	6	0	16
667	TRUE	Empty	Cullin-4B OS=Homo sapiens GN=CUL4B PE=1 SV=4	Q13620	CUL4B	104 kDa		unknown	6	0	19	0
668	TRUE	Empty	PDZ and LIM domain protein 1 OS=Homo sapiens GN=PDLIM1 PE=1 SV=4	O00151	PDLIM1	36 kDa		unknown	7	0	17	0
669	TRUE	Empty	Proteasome activator complex subunit 3 OS=Homo sapiens GN=PSME3 PE=1 SV=1	P61289	PSME3	30 kDa		unknown	7	0	16	0
670	TRUE	Empty	SRSF protein kinase 2 OS=Homo sapiens GN=SRPK2 PE=1 SV=3	P78362	SRPK2	78 kDa	TRUE	unknown	0	6	0	15
671	TRUE	Empty	Nucleolus and neural progenitor protein OS=Homo sapiens GN=NEPRO PE=1 SV=3	Q6NW34	NEPRO	65 kDa		unknown	0	5	0	17
672	TRUE	Empty	Serine/arginine repetitive matrix protein 1 OS=Homo sapiens GN=SRRM1 PE=1 SV=2	Q8IYB3	SRRM1	102 kDa		unknown	1	1	0	19
673	TRUE	Empty	Cluster of Clustered mitochondria protein homolog OS=Homo sapiens GN=CLUH PE=1 SV=2 (O75153)	O75153 [2]	CLUH	147 kDa	TRUE	unknown	6	0	16	0
673.1	TRUE	Empty	Clustered mitochondria protein homolog OS=Homo sapiens GN=CLUH PE=1 SV=2	O75153	CLUH	147 kDa	TRUE	unknown	6	0	13	0
673.2	TRUE	Empty	I3L2B0	I3L2B0		?	TRUE	unknown	0	0	16	0
674	TRUE	Empty	Eukaryotic translation initiation factor 4 gamma 2 OS=Homo sapiens GN=EIF4G2 PE=1 SV=1	P78344	EIF4G2	102 kDa		unknown	8	0	14	0
675	TRUE	Empty	Ribosomal RNA processing protein 1 homolog B OS=Homo sapiens GN=RRP1B PE=1 SV=3	Q14684	RRP1B	84 kDa		unknown	1	6	0	15
676	TRUE	Empty	Rab3 GTPase-activating protein catalytic subunit OS=Homo sapiens GN=RAB3GAP1 PE=1 SV=3	Q15042	RAB3GAP1	111 kDa		unknown	6	0	15	0
677	TRUE	Empty	RING finger protein 219 OS=Homo sapiens GN=RNF219 PE=1 SV=1	Q5W0B1	RNF219	81 kDa		unknown	1	5	0	16
678	TRUE	Empty	Nuclear pore membrane glycoprotein 210 OS=Homo sapiens GN=NUP210 PE=1 SV=3	Q8TEM1	NUP210	205 kDa		unknown	0	7	0	14
679	TRUE	Empty	39S ribosomal protein L3, mitochondrial OS=Homo sapiens GN=MRPL3 PE=1 SV=1	P09001	MRPL3	39 kDa		unknown	2	6	0	13
680	TRUE	Empty	Protein SDA1 homolog OS=Homo sapiens GN=SDAD1 PE=1 SV=3	Q9NVU7	SDAD1	80 kDa		unknown	0	2	1	16
681	TRUE	Empty	Aldehyde dehydrogenase, mitochondrial OS=Homo sapiens GN=ALDH2 PE=1 SV=2	P05091	ALDH2	56 kDa	TRUE	unknown	8	0	12	0
682	TRUE	Empty	Nuclear factor related to kappa-B-binding protein OS=Homo sapiens GN=NFRKB PE=1 SV=2	Q6P4R8	NFRKB	139 kDa		unknown	2	6	0	12
683	TRUE	Empty	Tyrosine-protein kinase BAZ1B OS=Homo sapiens GN=BAZ1B PE=1 SV=2	Q9UIG0	BAZ1B	171 kDa		unknown	1	9	0	11
684	TRUE	Empty	Translin-associated protein X OS=Homo sapiens GN=TSNAX PE=1 SV=1	Q99598	TSNAX	33 kDa		unknown	9	0	11	0
685	TRUE	Empty	Protein PRRC2C OS=Homo sapiens GN=PRRC2C PE=1 SV=4	Q9Y520	PRRC2C	317 kDa		unknown	7	1	7	7
686	TRUE	Empty	Cluster of Sarcoplasmic/endoplasmic reticulum calcium ATPase 2 OS=Homo sapiens GN=ATP2A2 PE=1 SV=1 (P16615)	P16615 [3]	ATP2A2	115 kDa	TRUE	unknown	7	2	5	5
686.1	TRUE	Empty	Sarcoplasmic/endoplasmic reticulum calcium ATPase 2 OS=Homo sapiens GN=ATP2A2 PE=1 SV=1	P16615	ATP2A2	115 kDa	TRUE	unknown	4	1	5	5
686.2	TRUE	Empty	Sarcoplasmic/endoplasmic reticulum calcium ATPase 1 OS=Homo sapiens GN=ATP2A1 PE=1 SV=1	O14983	ATP2A1	110 kDa	TRUE	unknown	6	0	4	3
686.3	TRUE	Empty	Sarcoplasmic/endoplasmic reticulum calcium ATPase 3 OS=Homo sapiens GN=ATP2A3 PE=1 SV=2	Q93084	ATP2A3	114 kDa	TRUE	unknown	0	1	0	2
687	TRUE	Empty	Transcription initiation factor TFIID subunit 4 OS=Homo sapiens GN=TAF4 PE=1 SV=2	O00268	TAF4	110 kDa		unknown	1	5	0	14
688	TRUE	Empty	Zinc finger CCCH domain-containing protein 18 OS=Homo sapiens GN=ZC3H18 PE=1 SV=2	Q86VM9	ZC3H18	106 kDa		unknown	0	8	0	10
689	TRUE	Empty	sp|Q8WZ42|TITIN_HUMAN-DECOY	sp|Q8WZ42|TITIN_HUMAN-DECOY		?		unknown	21	18	0	0
690	TRUE	Empty	Probable global transcription activator SNF2L1 OS=Homo sapiens GN=SMARCA1 PE=1 SV=2	P28370	SMARCA1	123 kDa	TRUE	unknown	0	6	0	11
691	TRUE	Empty	Aspartate aminotransferase, mitochondrial OS=Homo sapiens GN=GOT2 PE=1 SV=3	P00505	GOT2	48 kDa		unknown	8	0	7	3
692	TRUE	Empty	RNA polymerase-associated protein CTR9 homolog OS=Homo sapiens GN=CTR9 PE=1 SV=1	Q6PD62	CTR9	134 kDa		unknown	5	1	12	0
693	TRUE	Empty	28S ribosomal protein S27, mitochondrial OS=Homo sapiens GN=MRPS27 PE=1 SV=3	Q92552	MRPS27	48 kDa		unknown	0	8	0	8
694	TRUE	Empty	Structural maintenance of chromosomes protein 1A OS=Homo sapiens GN=SMC1A PE=1 SV=2	Q14683	SMC1A	143 kDa		unknown	9	0	9	0
695	TRUE	Empty	Titin OS=Homo sapiens GN=TTN PE=1 SV=4	Q8WZ42	TTN	3816 kDa		unknown	19	14	0	0
696	TRUE	Empty	Epidermal growth factor receptor substrate 15-like 1 OS=Homo sapiens GN=EPS15L1 PE=1 SV=1	Q9UBC2	EPS15L1	94 kDa		unknown	5	0	11	0
697	TRUE	Empty	Structural maintenance of chromosomes protein 3 OS=Homo sapiens GN=SMC3 PE=1 SV=2	Q9UQE7	SMC3	142 kDa		unknown	6	0	11	0
698	TRUE	Empty	Rho-associated protein kinase 2 OS=Homo sapiens GN=ROCK2 PE=1 SV=4	O75116	ROCK2	161 kDa		unknown	6	0	10	0
699	TRUE	Empty	V-type proton ATPase catalytic subunit A OS=Homo sapiens GN=ATP6V1A PE=1 SV=2	P38606	ATP6V1A	68 kDa		unknown	8	1	9	0
700	TRUE	Empty	Cluster of V-type proton ATPase subunit E 1 OS=Homo sapiens GN=ATP6V1E1 PE=1 SV=1 (P36543)	P36543 [2]	ATP6V1E1	26 kDa	TRUE	unknown	9	0	8	0
700.1	TRUE	Empty	V-type proton ATPase subunit E 1 OS=Homo sapiens GN=ATP6V1E1 PE=1 SV=1	P36543	ATP6V1E1	26 kDa	TRUE	unknown	8	0	8	0
700.2	TRUE	Empty	V-type proton ATPase subunit E 2 OS=Homo sapiens GN=ATP6V1E2 PE=1 SV=1	Q96A05	ATP6V1E2	26 kDa	TRUE	unknown	4	0	2	0
701	TRUE	Empty	DNA-directed RNA polymerase I subunit RPA49 OS=Homo sapiens GN=POLR1E PE=1 SV=2	Q9GZS1	POLR1E	54 kDa		unknown	0	5	0	10
702	TRUE	Empty	Serine/threonine-protein phosphatase 4 regulatory subunit 2 OS=Homo sapiens GN=PPP4R2 PE=1 SV=3	Q9NY27	PPP4R2	47 kDa		unknown	5	0	11	0
703	TRUE	Empty	Periodic tryptophan protein 1 homolog OS=Homo sapiens GN=PWP1 PE=1 SV=1	Q13610	PWP1	56 kDa		unknown	0	5	0	9
704	TRUE	Empty	Baculoviral IAP repeat-containing protein 6 OS=Homo sapiens GN=BIRC6 PE=1 SV=2	Q9NR09	BIRC6	530 kDa		unknown	5	3	4	7
705	TRUE	Empty	sp|Q5VST9|OBSCN_HUMAN-DECOY	sp|Q5VST9|OBSCN_HUMAN-DECOY		?		unknown	11	7	0	0
706	TRUE	Empty	E3 ubiquitin-protein ligase HERC2 OS=Homo sapiens GN=HERC2 PE=1 SV=2	O95714	HERC2	527 kDa		unknown	1	9	0	6
707	TRUE	Empty	Myb-binding protein 1A OS=Homo sapiens GN=MYBBP1A PE=1 SV=2	Q9BQG0	MYBBP1A	149 kDa		unknown	0	6	1	7
708	TRUE	Empty	DNA-directed RNA polymerase II subunit RPB2 OS=Homo sapiens GN=POLR2B PE=1 SV=1	P30876	POLR2B	134 kDa		unknown	7	0	9	0
709	TRUE	Empty	Cluster of Kinesin-like protein KIF1A OS=Homo sapiens GN=KIF1A PE=1 SV=2 (Q12756)	Q12756 [3]	KIF1A	191 kDa	TRUE	unknown	8	2	5	0
709.1	TRUE	Empty	Kinesin-like protein KIF1A OS=Homo sapiens GN=KIF1A PE=1 SV=2	Q12756	KIF1A	191 kDa	TRUE	unknown	5	0	5	0
709.2	TRUE	Empty	Kinesin-like protein KIF1B OS=Homo sapiens GN=KIF1B PE=1 SV=5	O60333	KIF1B	204 kDa	TRUE	unknown	5	2	0	0
709.3	TRUE	Empty	Kinesin-like protein KIF1C OS=Homo sapiens GN=KIF1C PE=1 SV=3	O43896	KIF1C	123 kDa	TRUE	unknown	1	0	3	0
710	TRUE	Empty	Uncharacterized protein C11orf98 OS=Homo sapiens GN=C11orf98 PE=4 SV=1	E9PRG8	C11orf98	14 kDa		unknown	0	7	0	5
711	TRUE	Empty	Programmed cell death 6-interacting protein OS=Homo sapiens GN=PDCD6IP PE=1 SV=1	Q8WUM4	PDCD6IP	96 kDa		unknown	5	0	9	0
712	TRUE	Empty	Microtubule-actin cross-linking factor 1, isoforms 1/2/3/5 OS=Homo sapiens GN=MACF1 PE=1 SV=4	Q9UPN3	MACF1	838 kDa		unknown	11	4	5	0
713	TRUE	Empty	Enhancer of mRNA-decapping protein 4 OS=Homo sapiens GN=EDC4 PE=1 SV=1	Q6P2E9	EDC4	152 kDa		unknown	5	2	2	5
714	TRUE	Empty	SNW domain-containing protein 1 OS=Homo sapiens GN=SNW1 PE=1 SV=1	Q13573	SNW1	61 kDa		unknown	1	5	0	6
715	TRUE	Empty	Cluster of Ankyrin repeat domain-containing protein 17 OS=Homo sapiens GN=ANKRD17 PE=1 SV=3 (O75179)	O75179 [2]	ANKRD17	274 kDa	TRUE	unknown	8	2	6	0
715.1	TRUE	Empty	Ankyrin repeat domain-containing protein 17 OS=Homo sapiens GN=ANKRD17 PE=1 SV=3	O75179	ANKRD17	274 kDa	TRUE	unknown	7	2	6	0
715.2	TRUE	Empty	Ankyrin repeat and KH domain-containing protein 1 OS=Homo sapiens GN=ANKHD1 PE=1 SV=1	Q8IWZ3	ANKHD1	269 kDa	TRUE	unknown	4	1	3	0
716	TRUE	Empty	sp|Q8NF91|SYNE1_HUMAN-DECOY	sp|Q8NF91|SYNE1_HUMAN-DECOY		?		unknown	3	14	0	0
717	TRUE	Empty	Myotubularin-related protein 5 OS=Homo sapiens GN=SBF1 PE=1 SV=3	O95248	SBF1	208 kDa		unknown	0	5	0	6
718	TRUE	Empty	Acetyl-CoA carboxylase 2 OS=Homo sapiens GN=ACACB PE=1 SV=3	O00763	ACACB	277 kDa	TRUE	unknown	5	1	6	0
719	TRUE	Empty	sp|O94808|GFPT2_HUMAN-DECOY	sp|O94808|GFPT2_HUMAN-DECOY		?		unknown	7	6	0	0
720	TRUE	Empty	Ras GTPase-activating protein-binding protein 2 OS=Homo sapiens GN=G3BP2 PE=1 SV=2	Q9UN86	G3BP2	54 kDa	TRUE	unknown	8	1	0	0
721	TRUE	Empty	Phosphorylase b kinase regulatory subunit beta OS=Homo sapiens GN=PHKB PE=1 SV=3	Q93100	PHKB	125 kDa		unknown	1	6	0	6
722	TRUE	Empty	U4/U6.U5 tri-snRNP-associated protein 1 OS=Homo sapiens GN=SART1 PE=1 SV=1	O43290	SART1	90 kDa		unknown	0	8	0	4
723	TRUE	Empty	Large proline-rich protein BAG6 OS=Homo sapiens GN=BAG6 PE=1 SV=2	P46379	BAG6	119 kDa		unknown	5	0	3	2
724	TRUE	Empty	Mediator of RNA polymerase II transcription subunit 14 OS=Homo sapiens GN=MED14 PE=1 SV=2	O60244	MED14	161 kDa		unknown	0	5	0	2
725	TRUE	Empty	sp|P20929|NEBU_HUMAN-DECOY	sp|P20929|NEBU_HUMAN-DECOY		?		unknown	11	0	0	0
726	TRUE	Empty	Serine/threonine-protein kinase mTOR OS=Homo sapiens GN=MTOR PE=1 SV=1	P42345	MTOR	289 kDa		unknown	6	0	1	0
727	TRUE	Empty	Protein piccolo OS=Homo sapiens GN=PCLO PE=1 SV=4	Q9Y6V0	PCLO	553 kDa		unknown	6	0	0	0
728	TRUE	Empty	Ankyrin repeat domain-containing protein 12 OS=Homo sapiens GN=ANKRD12 PE=1 SV=3	Q6UB98	ANKRD12	236 kDa		unknown	6	0	0	0
729	TRUE	Empty	Fibrous sheath-interacting protein 2 OS=Homo sapiens GN=FSIP2 PE=2 SV=4	Q5CZC0	FSIP2	781 kDa		unknown	5	5	0	0
730	TRUE	Empty	Centrosomal protein of 290 kDa OS=Homo sapiens GN=CEP290 PE=1 SV=2	O15078	CEP290	290 kDa		unknown	5	0	0	0
731	TRUE	Empty	Histone-lysine N-methyltransferase 2A OS=Homo sapiens GN=KMT2A PE=1 SV=5	Q03164	KMT2A	432 kDa		unknown	6	2	1	2
732	TRUE	Empty	Plectin OS=Homo sapiens GN=PLEC PE=1 SV=3	Q15149	PLEC	532 kDa	TRUE	unknown	8	1	0	0
733	TRUE	Empty	Protocadherin Fat 3 OS=Homo sapiens GN=FAT3 PE=2 SV=2	Q8TDW7	FAT3	506 kDa		unknown	7	0	0	0
734	TRUE	Empty	sp|P15924|DESP_HUMAN-DECOY	sp|P15924|DESP_HUMAN-DECOY		?		unknown	5	1	0	0
735	TRUE	Empty	Dynein heavy chain 17, axonemal OS=Homo sapiens GN=DNAH17 PE=1 SV=2	Q9UFH2	DNAH17	512 kDa		unknown	5	0	0	0
736	TRUE	Empty	sp|Q8WXH0|SYNE2_HUMAN-DECOY	sp|Q8WXH0|SYNE2_HUMAN-DECOY		?		unknown	9	2	0	0
737	TRUE	Empty	Cardiomyopathy-associated protein 5 OS=Homo sapiens GN=CMYA5 PE=1 SV=3	Q8N3K9	CMYA5	449 kDa		unknown	5	1	0	0
738	TRUE	Empty	sp|O95714|HERC2_HUMAN-DECOY	sp|O95714|HERC2_HUMAN-DECOY		?		unknown	5	0	0	0
739	TRUE	Empty	Nesprin-2 OS=Homo sapiens GN=SYNE2 PE=1 SV=3	Q8WXH0	SYNE2	796 kDa		unknown	6	0	0	0
740	TRUE	Empty	Msx2-interacting protein OS=Homo sapiens GN=SPEN PE=1 SV=1	Q96T58	SPEN	402 kDa		unknown	8	0	0	0
END OF FILE
