# Supplementary material
Source: HighWire-hosted journal article supplement (doi:10.1101/rna.077602.120)
Supplement: Supplemental_Table_S3.xlsx [file Supplemental_Table_S3.xlsx]

## Sheet: Sheet1
PDB ID	EBP1	28S rRNA	eL19	uL23	5.8S rRNA	uL29	uL24
6zmo (Thoms et al. 2020)	K238				G78
	K311				G79
	D207						N91
	G241					A40
	K258		N36
	Y255		N34
	Q254		Q40
	G256
	K258			K88
	R290			N151
	K287			D148
	M259			E84
	T261			M87
	K288			E91
	M291			L147
	V294			I156
	R243
	K260	U2707
	R271	C2709
	R263	C390
	L257	U391
	K211	U2708
	Q254	C2526
	Y255
	G256
	K258
	F266
	S267
6z6l (Wells et al. 2020)	K238				G78
					G79
	G241					K43
	Y255		N36
	Q254		N34
	G256		Q40
	K258
	K258			K88
	M259			E84
	K260			M87
	T261			E91
	K287			L147
	R290			D148
	M291			N151
	V294			I156
	K260	U2707
	R263	U2708
	Y255	C2709
	S267	A389
	L257	C390
	K211	C2710
	G256	C2526
	K258
	F266
	L301
6sxo (Wild et al. 2020)	K236				A77
	K238				G78
	K311				G79
	A240					S42
	D239					A40
	G241					K43
	K210						N91
	D207
	Y255		N36
	G256		N34
	Q254		S37
	K258		Q39
	R263
	H299			E84
	T261			E91
	K287			D148
	R290			N151
	R243			I156
	M259			M87
	M291			L147
	V294
	E295
	Y255	U2708
	L257	C2709
	R263	G2711
	S267	C2526
	K258	A389
	K210	C390
	K211	U391
	K215
	Q254
	G256
	F266
	R271
6swa (Kraushar et al. 2020)	K238				G78
	D207						T93
	G256		N36
	R263		Q40
	Q254		N34
	Y255		S37
	K258		Q39
	M259			M87
	T261			E91
	K287			L147
	M291			N151
	K211	C2505
	Q254	U2687
	Y255	U2688
	G256	U2689
	L257	C384
	K258
	K260
	R263
	F266
	S267
	R271
7bhp (This study)	K238				G78
	A240					A40
	G256		N36
	Q254		N34
	Y255		S37
	K258
	K258			E84
	R290			N151
	M259			M87
	K287			K88
	K288			I90
	M291			E91
	V294			L147
	E295			D148
				I156
	K258	C2526
	Y255	U2708
	L257	C2709
	R263	G2711
	K260	G2712
	S267
	R271
	Q254
	G256
	F266
	L301
6lsr (Liang et al. 2020)	D207						N91
	G256		Q40
	Y255		N36
	R243			M87
	M259			K88
	T261			E91
	K287			L147
	K288			D148
	R290			N151
	M291			I156
	V294
	K211	C390
	K258	C2526
